# Supplementary material for: The contribution of avoidable mortality to life expectancy differences and lifespan disparities in the European Union: a population-based study
Source: PubMed Central journal article supplement (PMC11402299; doi:10.1016/j.lanepe.2024.101042), 2024-08-30
Supplement: mmc1.pdf [file mmc1.pdf]

## **SUPPLEMENTARY MATERIAL**

### **The contribution of avoidable mortality to life expectancy differences and lifespan disparities in the European Union**

Rok Hrzic and Tobias Vogt

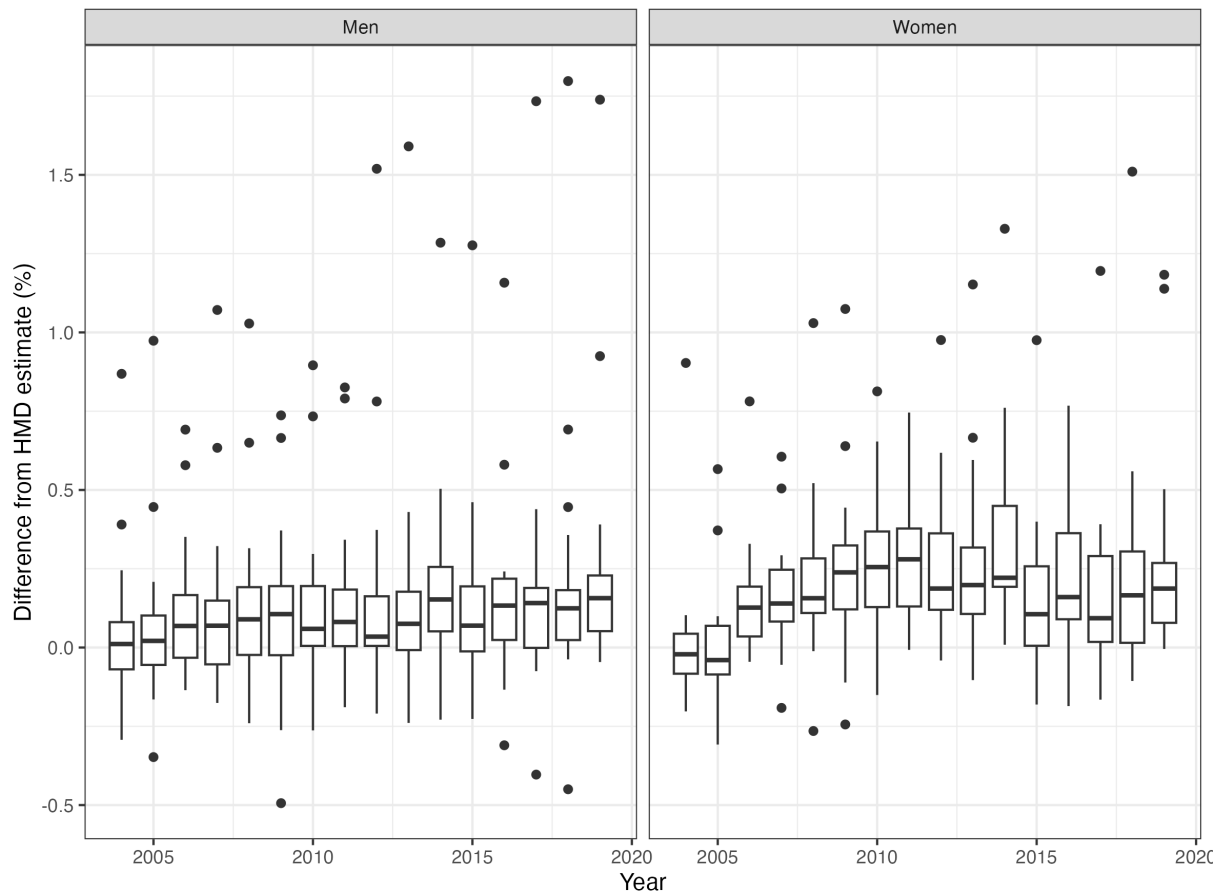

**Supplementary Fig. 1: Comparison of life expectancy at birth estimates in this study with the estimates from the Human Mortality Database.** Note: Most positive outliers are data points from Luxembourg.

**Supplementary Table 1: Life expectancy gains in men under different scenarios, 2005-2019**

| Country                   | Status Quo | EMS avoidable mortality in NMS <sup>a</sup> | EMS preventable mortality in NMS <sup>a</sup> | EMS treatable mortality in NMS <sup>a</sup> | All avoidable deaths removed | Only preventable deaths removed | Only treatable deaths removed |
|---------------------------|------------|---------------------------------------------|-----------------------------------------------|---------------------------------------------|------------------------------|---------------------------------|-------------------------------|
| Austria                   | 78.34      | 0.00                                        | 0.00                                          | 0.00                                        | 5.47                         | 3.83                            | 1.42                          |
| Belgium                   | 77.98      | 0.00                                        | 0.00                                          | 0.00                                        | 5.19                         | 3.73                            | 1.28                          |
| Bulgaria                  | 70.55      | 4.02                                        | 1.95                                          | 1.89                                        | 8.06                         | 4.43                            | 2.95                          |
| Croatia                   | 73.71      | 3.21                                        | 2.11                                          | 1.00                                        | 7.73                         | 5.00                            | 2.17                          |
| Cyprus                    | 79.36      | 0.27                                        | 0.21                                          | 0.17                                        | 4.68                         | 2.98                            | 1.54                          |
| Czech Republic            | 74.93      | 2.40                                        | 1.38                                          | 0.95                                        | 6.94                         | 4.31                            | 2.16                          |
| Denmark                   | 77.93      | 0.00                                        | 0.00                                          | 0.00                                        | 4.96                         | 3.43                            | 1.34                          |
| Estonia                   | 70.54      | 5.98                                        | 4.25                                          | 1.43                                        | 10.54                        | 7.10                            | 2.49                          |
| Finland                   | 77.46      | 0.00                                        | 0.00                                          | 0.00                                        | 6.49                         | 4.67                            | 1.52                          |
| France                    | 78.46      | 0.00                                        | 0.00                                          | 0.00                                        | 5.13                         | 3.76                            | 1.21                          |
| Germany                   | 78.09      | 0.00                                        | 0.00                                          | 0.00                                        | 5.20                         | 3.43                            | 1.55                          |
| Hungary                   | 71.22      | 5.40                                        | 3.52                                          | 1.56                                        | 9.83                         | 6.26                            | 2.63                          |
| Ireland                   | 78.91      | 0.00                                        | 0.00                                          | 0.00                                        | 4.93                         | 3.30                            | 1.44                          |
| Italy                     | 79.76      | 0.00                                        | 0.00                                          | 0.00                                        | 4.39                         | 2.95                            | 1.30                          |
| Latvia                    | 68.32      | 7.42                                        | 4.83                                          | 2.04                                        | 11.68                        | 7.38                            | 3.01                          |
| Lithuania                 | 68.06      | 7.78                                        | 5.24                                          | 1.98                                        | 12.11                        | 7.84                            | 2.96                          |
| Luxembourg                | 79.56      | 0.00                                        | 0.00                                          | 0.00                                        | 4.65                         | 3.23                            | 1.25                          |
| Malta                     | 78.69      | 0.47                                        | 0.19                                          | 0.39                                        | 4.98                         | 3.01                            | 1.77                          |
| Netherlands               | 79.27      | 0.00                                        | 0.00                                          | 0.00                                        | 4.02                         | 2.67                            | 1.22                          |
| Poland                    | 72.56      | 3.35                                        | 2.14                                          | 1.10                                        | 7.69                         | 4.92                            | 2.24                          |
| Portugal                  | 77.28      | 0.00                                        | 0.00                                          | 0.00                                        | 5.41                         | 3.58                            | 1.59                          |
| Romania                   | 70.65      | 5.79                                        | 3.24                                          | 2.20                                        | 10.21                        | 5.93                            | 3.30                          |
| Slovakia                  | 72.29      | 4.21                                        | 2.37                                          | 1.63                                        | 8.66                         | 5.12                            | 2.77                          |
| Slovenia                  | 76.76      | 1.69                                        | 1.43                                          | 0.27                                        | 6.43                         | 4.64                            | 1.48                          |
| Spain                     | 79.27      | 0.00                                        | 0.00                                          | 0.00                                        | 4.85                         | 3.27                            | 1.40                          |
| Sweden                    | 79.86      | 0.00                                        | 0.00                                          | 0.00                                        | 4.20                         | 2.80                            | 1.27                          |
| United Kingdom            | 78.65      | 0.00                                        | 0.00                                          | 0.00                                        | 5.39                         | 3.45                            | 1.72                          |
| New member states         | 72.87      | 4.01                                        | 2.53                                          | 1.28                                        | 8.43                         | 5.30                            | 2.43                          |
| Established member states | 78.65      | 0.00                                        | 0.00                                          | 0.00                                        | 5.01                         | 3.43                            | 1.39                          |

<sup>a</sup>NMS = New member states, EMS = Established member states;

**Supplementary Table 2: Life expectancy gains in women under different scenarios, 2005-2019**

| Country                   | Status Quo | EMS avoidable mortality in NMS <sup>a</sup> | EMS preventable mortality in NMS <sup>a</sup> | EMS treatable mortality in NMS <sup>a</sup> | All avoidable deaths removed | Only preventable deaths removed | Only treatable deaths removed |
|---------------------------|------------|---------------------------------------------|-----------------------------------------------|---------------------------------------------|------------------------------|---------------------------------|-------------------------------|
| Austria                   | 83·51      | 0·00                                        | 0·00                                          | 0·00                                        | 3·09                         | 1·70                            | 1·32                          |
| Belgium                   | 83·15      | 0·00                                        | 0·00                                          | 0·00                                        | 3·30                         | 1·79                            | 1·43                          |
| Bulgaria                  | 77·67      | 2·09                                        | 0·70                                          | 1·34                                        | 4·63                         | 1·92                            | 2·52                          |
| Croatia                   | 80·24      | 1·19                                        | 0·56                                          | 0·64                                        | 3·91                         | 1·88                            | 1·89                          |
| Cyprus                    | 83·70      | 0·10                                        | 0·08                                          | 0·08                                        | 2·39                         | 1·06                            | 1·29                          |
| Czech Republic            | 81·08      | 0·97                                        | 0·48                                          | 0·48                                        | 3·72                         | 1·86                            | 1·73                          |
| Denmark                   | 81·99      | 0·00                                        | 0·00                                          | 0·00                                        | 3·59                         | 2·07                            | 1·41                          |
| Estonia                   | 80·55      | 1·92                                        | 1·24                                          | 0·68                                        | 4·81                         | 2·65                            | 1·97                          |
| Finland                   | 83·74      | 0·00                                        | 0·00                                          | 0·00                                        | 3·18                         | 1·84                            | 1·26                          |
| France                    | 85·19      | 0·00                                        | 0·00                                          | 0·00                                        | 2·84                         | 1·43                            | 1·35                          |
| Germany                   | 82·99      | 0·00                                        | 0·00                                          | 0·00                                        | 3·15                         | 1·61                            | 1·46                          |
| Hungary                   | 78·71      | 2·75                                        | 1·62                                          | 1·06                                        | 5·48                         | 2·93                            | 2·27                          |
| Ireland                   | 83·11      | 0·00                                        | 0·00                                          | 0·00                                        | 3·22                         | 1·67                            | 1·47                          |
| Italy                     | 84·79      | 0·00                                        | 0·00                                          | 0·00                                        | 2·62                         | 1·19                            | 1·38                          |
| Latvia                    | 78·44      | 2·97                                        | 1·59                                          | 1·31                                        | 5·70                         | 2·89                            | 2·52                          |
| Lithuania                 | 79·14      | 2·72                                        | 1·54                                          | 1·13                                        | 5·50                         | 2·88                            | 2·37                          |
| Luxembourg                | 84·21      | 0·00                                        | 0·00                                          | 0·00                                        | 2·93                         | 1·59                            | 1·28                          |
| Malta                     | 83·15      | 0·41                                        | 0·10                                          | 0·49                                        | 3·05                         | 1·16                            | 1·81                          |
| Netherlands               | 83·01      | 0·00                                        | 0·00                                          | 0·00                                        | 3·20                         | 1·69                            | 1·43                          |
| Poland                    | 80·88      | 1·21                                        | 0·57                                          | 0·63                                        | 4·03                         | 1·95                            | 1·94                          |
| Portugal                  | 83·63      | 0·00                                        | 0·00                                          | 0·00                                        | 2·82                         | 1·26                            | 1·50                          |
| Romania                   | 77·94      | 3·12                                        | 1·40                                          | 1·63                                        | 5·80                         | 2·67                            | 2·84                          |
| Slovakia                  | 79·69      | 1·74                                        | 0·72                                          | 1·00                                        | 4·47                         | 2·03                            | 2·26                          |
| Slovenia                  | 83·18      | 0·40                                        | 0·33                                          | 0·13                                        | 3·27                         | 1·78                            | 1·40                          |
| Spain                     | 85·33      | 0·00                                        | 0·00                                          | 0·00                                        | 2·43                         | 1·10                            | 1·29                          |
| Sweden                    | 83·68      | 0·00                                        | 0·00                                          | 0·00                                        | 2·89                         | 1·60                            | 1·22                          |
| United Kingdom            | 82·54      | 0·00                                        | 0·00                                          | 0·00                                        | 3·66                         | 1·88                            | 1·67                          |
| New member states         | 80·31      | 1·67                                        | 0·84                                          | 0·82                                        | 4·37                         | 2·13                            | 2·07                          |
| Established member states | 83·62      | 0·00                                        | 0·00                                          | 0·00                                        | 3·07                         | 1·61                            | 1·39                          |

<sup>a</sup>NMS = New member states, EMS = Established member states;

**Supplementary Table 3: Lifespan disparity reductions in men under different scenarios, 2005-2019**

| Country                   | Status Quo | EMS avoidable mortality in NMS <sup>a</sup> | EMS preventable mortality in NMS <sup>a</sup> | EMS treatable mortality in NMS <sup>a</sup> | All avoidable deaths removed | Only preventable deaths removed | Only treatable deaths removed |
|---------------------------|------------|---------------------------------------------|-----------------------------------------------|---------------------------------------------|------------------------------|---------------------------------|-------------------------------|
| Austria                   | 16.01      | 0.00                                        | 0.00                                          | 0.00                                        | -3.94                        | -2.66                           | -0.90                         |
| Belgium                   | 16.11      | 0.00                                        | 0.00                                          | 0.00                                        | -3.69                        | -2.57                           | -0.80                         |
| Bulgaria                  | 17.28      | -1.83                                       | -0.80                                         | -0.79                                       | -4.31                        | -2.05                           | -1.29                         |
| Croatia                   | 16.16      | -1.62                                       | -1.04                                         | -0.42                                       | -4.78                        | -2.85                           | -1.05                         |
| Cyprus                    | 15.23      | -0.22                                       | -0.18                                         | -0.12                                       | -3.53                        | -2.17                           | -1.05                         |
| Czech Republic            | 16.20      | -1.21                                       | -0.70                                         | -0.40                                       | -4.38                        | -2.54                           | -1.09                         |
| Denmark                   | 15.51      | 0.00                                        | 0.00                                          | 0.00                                        | -3.47                        | -2.31                           | -0.83                         |
| Estonia                   | 18.49      | -2.95                                       | -2.11                                         | -0.43                                       | -6.01                        | -3.73                           | -0.88                         |
| Finland                   | 16.51      | 0.00                                        | 0.00                                          | 0.00                                        | -4.67                        | -3.25                           | -0.91                         |
| France                    | 17.19      | 0.00                                        | 0.00                                          | 0.00                                        | -3.68                        | -2.62                           | -0.78                         |
| Germany                   | 16.43      | 0.00                                        | 0.00                                          | 0.00                                        | -3.60                        | -2.27                           | -0.95                         |
| Hungary                   | 17.80      | -2.37                                       | -1.42                                         | -0.51                                       | -5.36                        | -2.97                           | -0.99                         |
| Ireland                   | 15.38      | 0.00                                        | 0.00                                          | 0.00                                        | -3.64                        | -2.37                           | -0.95                         |
| Italy                     | 15.40      | 0.00                                        | 0.00                                          | 0.00                                        | -3.28                        | -2.12                           | -0.89                         |
| Latvia                    | 18.75      | -3.32                                       | -2.08                                         | -0.54                                       | -6.12                        | -3.39                           | -0.91                         |
| Lithuania                 | 19.33      | -3.57                                       | -2.34                                         | -0.51                                       | -6.41                        | -3.68                           | -0.88                         |
| Luxembourg                | 15.30      | 0.00                                        | 0.00                                          | 0.00                                        | -3.42                        | -2.31                           | -0.82                         |
| Malta                     | 15.36      | -0.31                                       | -0.12                                         | -0.27                                       | -3.64                        | -2.08                           | -1.19                         |
| Netherlands               | 15.12      | 0.00                                        | 0.00                                          | 0.00                                        | -2.90                        | -1.85                           | -0.83                         |
| Poland                    | 18.30      | -1.66                                       | -1.05                                         | -0.46                                       | -4.39                        | -2.59                           | -1.01                         |
| Portugal                  | 16.05      | 0.00                                        | 0.00                                          | 0.00                                        | -3.80                        | -2.42                           | -0.99                         |
| Romania                   | 18.25      | -2.84                                       | -1.40                                         | -0.96                                       | -5.84                        | -2.89                           | -1.48                         |
| Slovakia                  | 17.29      | -1.98                                       | -1.06                                         | -0.62                                       | -5.00                        | -2.64                           | -1.20                         |
| Slovenia                  | 16.41      | -0.97                                       | -0.85                                         | -0.12                                       | -4.37                        | -3.02                           | -0.82                         |
| Spain                     | 16.35      | 0.00                                        | 0.00                                          | 0.00                                        | -3.51                        | -2.27                           | -0.92                         |
| Sweden                    | 14.70      | 0.00                                        | 0.00                                          | 0.00                                        | -3.19                        | -2.07                           | -0.87                         |
| United Kingdom            | 16.37      | 0.00                                        | 0.00                                          | 0.00                                        | -3.94                        | -2.41                           | -1.14                         |
| New member states         | 17.30      | -1.91                                       | -1.16                                         | -0.47                                       | -4.93                        | -2.81                           | -1.06                         |
| Established member states | 15.87      | 0.00                                        | 0.00                                          | 0.00                                        | -3.62                        | -2.39                           | -0.90                         |

<sup>a</sup>NMS = New member states, EMS = Established member states;

**Supplementary Table 4: Lifespan disparity reductions in women under different scenarios, 2005-2019**

| Country                   | Status Quo | EMS avoidable mortality in NMS <sup>a</sup> | EMS preventable mortality in NMS <sup>a</sup> | EMS treatable mortality in NMS <sup>a</sup> | All avoidable deaths removed | Only preventable deaths removed | Only treatable deaths removed |
|---------------------------|------------|---------------------------------------------|-----------------------------------------------|---------------------------------------------|------------------------------|---------------------------------|-------------------------------|
| Austria                   | 14.26      | 0.00                                        | 0.00                                          | 0.00                                        | -2.58                        | -1.37                           | -1.06                         |
| Belgium                   | 15.02      | 0.00                                        | 0.00                                          | 0.00                                        | -2.72                        | -1.44                           | -1.13                         |
| Bulgaria                  | 14.96      | -1.39                                       | -0.43                                         | -0.89                                       | -3.32                        | -1.26                           | -1.72                         |
| Croatia                   | 13.96      | -0.81                                       | -0.36                                         | -0.42                                       | -3.00                        | -1.36                           | -1.37                         |
| Cyprus                    | 13.37      | -0.08                                       | -0.07                                         | -0.07                                       | -2.00                        | -0.86                           | -1.05                         |
| Czech Republic            | 14.33      | -0.65                                       | -0.33                                         | -0.31                                       | -2.87                        | -1.37                           | -1.26                         |
| Denmark                   | 15.07      | 0.00                                        | 0.00                                          | 0.00                                        | -2.79                        | -1.54                           | -1.05                         |
| Estonia                   | 15.61      | -1.40                                       | -0.92                                         | -0.45                                       | -3.75                        | -1.99                           | -1.40                         |
| Finland                   | 14.56      | 0.00                                        | 0.00                                          | 0.00                                        | -2.67                        | -1.52                           | -1.01                         |
| France                    | 15.62      | 0.00                                        | 0.00                                          | 0.00                                        | -2.43                        | -1.20                           | -1.13                         |
| Germany                   | 14.41      | 0.00                                        | 0.00                                          | 0.00                                        | -2.58                        | -1.28                           | -1.15                         |
| Hungary                   | 15.82      | -1.82                                       | -1.03                                         | -0.66                                       | -3.98                        | -1.98                           | -1.51                         |
| Ireland                   | 14.64      | 0.00                                        | 0.00                                          | 0.00                                        | -2.63                        | -1.31                           | -1.16                         |
| Italy                     | 14.45      | 0.00                                        | 0.00                                          | 0.00                                        | -2.23                        | -0.98                           | -1.15                         |
| Latvia                    | 15.90      | -2.05                                       | -1.09                                         | -0.83                                       | -4.22                        | -2.02                           | -1.70                         |
| Lithuania                 | 15.86      | -1.94                                       | -1.09                                         | -0.74                                       | -4.18                        | -2.07                           | -1.64                         |
| Luxembourg                | 14.70      | 0.00                                        | 0.00                                          | 0.00                                        | -2.43                        | -1.28                           | -1.02                         |
| Malta                     | 14.71      | -0.33                                       | -0.08                                         | -0.39                                       | -2.49                        | -0.91                           | -1.45                         |
| Netherlands               | 14.81      | 0.00                                        | 0.00                                          | 0.00                                        | -2.61                        | -1.32                           | -1.13                         |
| Poland                    | 15.73      | -0.85                                       | -0.40                                         | -0.44                                       | -3.08                        | -1.42                           | -1.41                         |
| Portugal                  | 14.12      | 0.00                                        | 0.00                                          | 0.00                                        | -2.36                        | -1.03                           | -1.22                         |
| Romania                   | 15.55      | -2.13                                       | -0.88                                         | -1.09                                       | -4.26                        | -1.78                           | -1.96                         |
| Slovakia                  | 14.93      | -1.17                                       | -0.47                                         | -0.65                                       | -3.34                        | -1.42                           | -1.58                         |
| Slovenia                  | 14.60      | -0.30                                       | -0.25                                         | -0.09                                       | -2.67                        | -1.41                           | -1.09                         |
| Spain                     | 14.46      | 0.00                                        | 0.00                                          | 0.00                                        | -2.10                        | -0.93                           | -1.09                         |
| Sweden                    | 14.15      | 0.00                                        | 0.00                                          | 0.00                                        | -2.40                        | -1.29                           | -0.97                         |
| United Kingdom            | 15.30      | 0.00                                        | 0.00                                          | 0.00                                        | -2.95                        | -1.45                           | -1.30                         |
| New member states         | 15.03      | -1.15                                       | -0.57                                         | -0.54                                       | -3.32                        | -1.53                           | -1.47                         |
| Established member states | 14.68      | 0.00                                        | 0.00                                          | 0.00                                        | -2.54                        | -1.28                           | -1.11                         |

<sup>a</sup>NMS = New member states, EMS = Established member states;

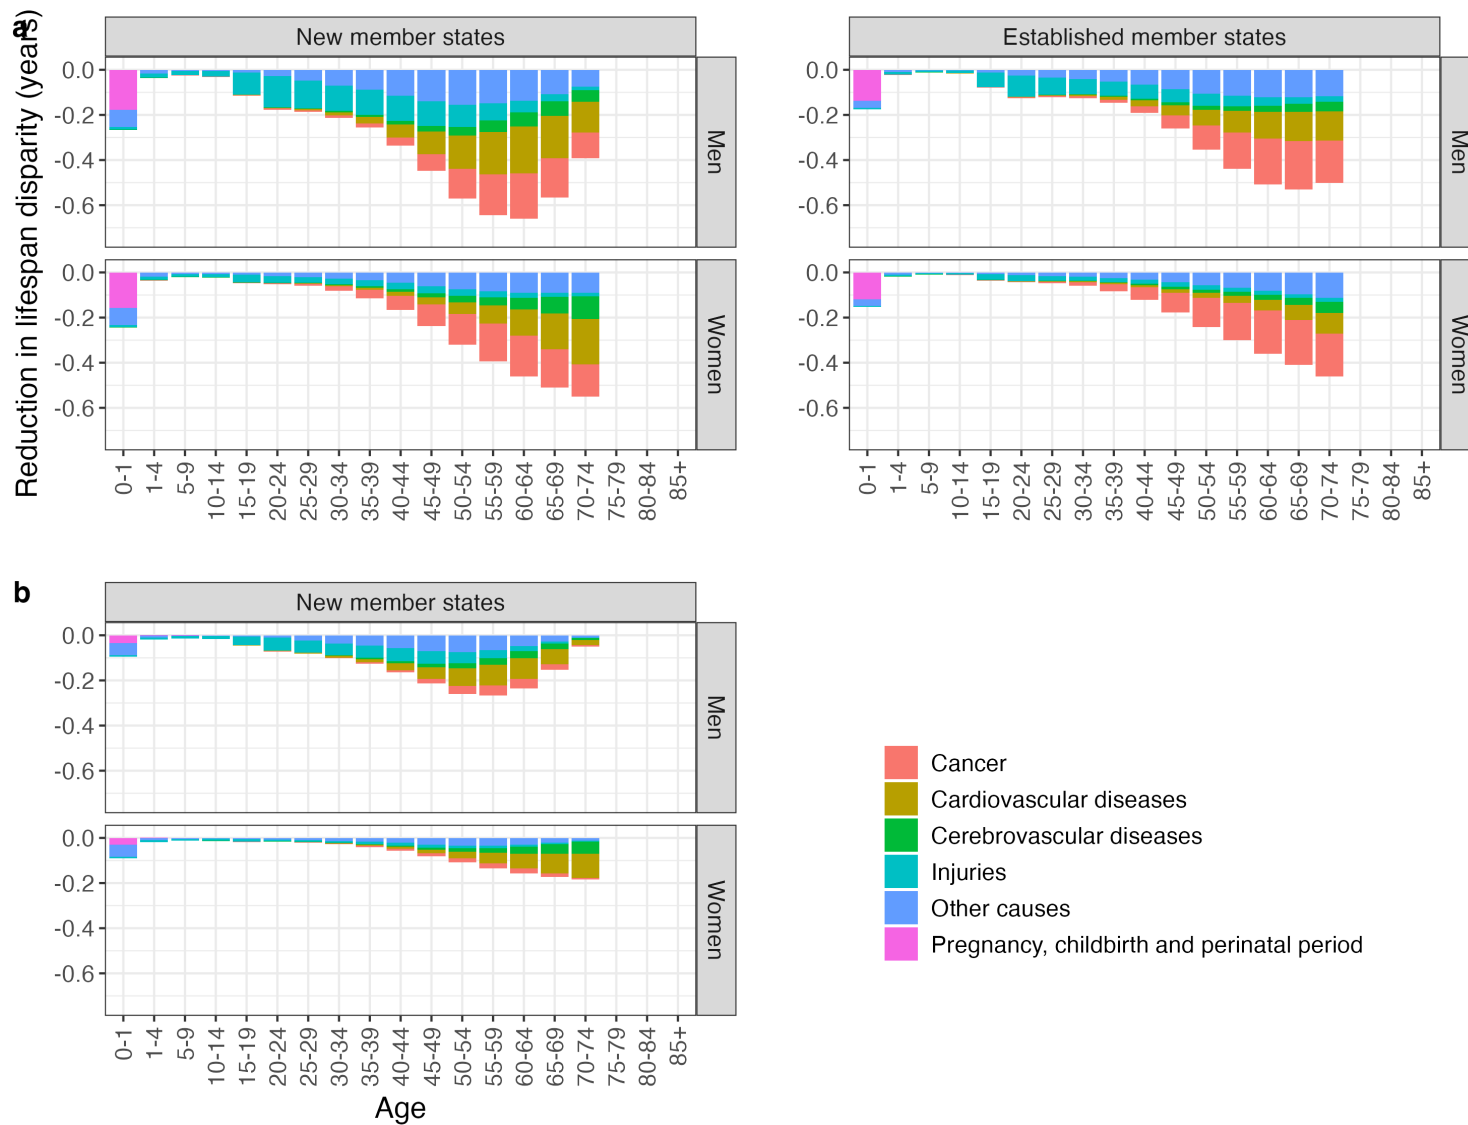

**Supplementary Fig. 2: The average contribution of cause groups to the estimated reductions in lifespan disparity (a) if all avoidable deaths were averted and (b) if new member states were assigned average avoidable mortality rates observed across the established member states, 2005-2019, by sex**

**Supplementary Table 5: The average contribution of cause groups to the estimated gains in male life expectancy by EU member state if all avoidable deaths were averted, 2005-2019**

| Country                                    | Cause Group                                  | 0-1  | 1-4  | 5-9  | 10-14 | 15-19 | 20-24 | 25-29 | 30-34 | 35-39 | 40-44 | 45-49 | 50-54 | 55-59 | 60-64 | 65-69 | 70-74 |
|--------------------------------------------|----------------------------------------------|------|------|------|-------|-------|-------|-------|-------|-------|-------|-------|-------|-------|-------|-------|-------|
| Austria                                    | Adverse effects of medical and surgical care | 0·00 | 0·00 | 0·00 | 0·00  | 0·00  | 0·00  | 0·00  | 0·00  | 0·00  | 0·00  | 0·00  | 0·00  | 0·00  | 0·00  | 0·00  | 0·00  |
|                                            | Alcohol- related and drug related deaths     | 0·00 | 0·00 | 0·00 | 0·00  | 0·02  | 0·03  | 0·03  | 0·03  | 0·04  | 0·04  | 0·07  | 0·08  | 0·10  | 0·10  | 0·08  | 0·06  |
|                                            | Cancer                                       | 0·00 | 0·00 | 0·00 | 0·00  | 0·00  | 0·00  | 0·01  | 0·01  | 0·02  | 0·03  | 0·07  | 0·14  | 0·23  | 0·30  | 0·33  | 0·32  |
|                                            | Cardiovascular diseases                      | 0·00 | 0·00 | 0·00 | 0·00  | 0·00  | 0·00  | 0·00  | 0·01  | 0·02  | 0·03  | 0·06  | 0·10  | 0·15  | 0·21  | 0·26  | 0·32  |
|                                            | Cerebrovascular diseases                     | 0·00 | 0·00 | 0·00 | 0·00  | 0·00  | 0·00  | 0·00  | 0·00  | 0·00  | 0·01  | 0·01  | 0·02  | 0·02  | 0·03  | 0·05  | 0·07  |
|                                            | Congenital malformations                     | 0·03 | 0·00 | 0·00 | 0·00  | 0·00  | 0·00  | 0·00  | 0·00  | 0·00  | 0·00  | 0·00  | 0·00  | 0·00  | 0·00  | 0·00  | 0·00  |
|                                            | Diseases of the digestive system             | 0·00 | 0·00 | 0·00 | 0·00  | 0·00  | 0·00  | 0·00  | 0·00  | 0·00  | 0·00  | 0·00  | 0·00  | 0·01  | 0·01  | 0·01  | 0·01  |
|                                            | Diseases of the genitourinary system         | 0·00 | 0·00 | 0·00 | 0·00  | 0·00  | 0·00  | 0·00  | 0·00  | 0·00  | 0·00  | 0·00  | 0·00  | 0·00  | 0·00  | 0·01  | 0·01  |
|                                            | Diseases of the nervous system               | 0·00 | 0·00 | 0·00 | 0·00  | 0·00  | 0·00  | 0·00  | 0·00  | 0·00  | 0·00  | 0·00  | 0·00  | 0·00  | 0·00  | 0·00  | 0·00  |
|                                            | Diseases of the respiratory system           | 0·00 | 0·00 | 0·00 | 0·00  | 0·00  | 0·00  | 0·00  | 0·00  | 0·00  | 0·00  | 0·01  | 0·01  | 0·03  | 0·05  | 0·08  | 0·09  |
|                                            | Endocrine and metabolic diseases             | 0·00 | 0·00 | 0·00 | 0·00  | 0·00  | 0·00  | 0·00  | 0·00  | 0·00  | 0·00  | 0·01  | 0·01  | 0·02  | 0·04  | 0·05  | 0·06  |
|                                            | Infectious diseases                          | 0·00 | 0·00 | 0·00 | 0·00  | 0·00  | 0·00  | 0·00  | 0·00  | 0·01  | 0·01  | 0·01  | 0·01  | 0·01  | 0·01  | 0·01  | 0·01  |
|                                            | Injuries                                     | 0·01 | 0·02 | 0·01 | 0·01  | 0·10  | 0·12  | 0·09  | 0·08  | 0·08  | 0·08  | 0·09  | 0·08  | 0·08  | 0·07  | 0·06  | 0·06  |
|                                            | Nonavoidable deaths                          | 0·00 | 0·00 | 0·00 | 0·00  | 0·00  | 0·00  | 0·00  | 0·00  | 0·00  | 0·00  | 0·00  | 0·00  | 0·00  | 0·00  | 0·00  | 0·00  |
| Pregnancy, childbirth and perinatal period | 0·16                                         | 0·00 | 0·00 | 0·00 | 0·00  | 0·00  | 0·00  | 0·00  | 0·00  | 0·00  | 0·00  | 0·00  | 0·00  | 0·00  | 0·00  | 0·00  |       |
| Belgium                                    | Adverse effects of medical and surgical care | 0·00 | 0·00 | 0·00 | 0·00  | 0·00  | 0·00  | 0·00  | 0·00  | 0·00  | 0·00  | 0·00  | 0·00  | 0·00  | 0·00  | 0·00  | 0·00  |
|                                            | Alcohol- related and drug related deaths     | 0·00 | 0·00 | 0·00 | 0·00  | 0·00  | 0·01  | 0·02  | 0·02  | 0·03  | 0·04  | 0·05  | 0·06  | 0·07  | 0·06  | 0·05  | 0·03  |
|                                            | Cancer                                       | 0·00 | 0·00 | 0·00 | 0·00  | 0·00  | 0·00  | 0·01  | 0·01  | 0·02  | 0·03  | 0·07  | 0·14  | 0·23  | 0·32  | 0·37  | 0·36  |
|                                            | Cardiovascular diseases                      | 0·00 | 0·00 | 0·00 | 0·00  | 0·00  | 0·00  | 0·00  | 0·01  | 0·01  | 0·02  | 0·04  | 0·07  | 0·10  | 0·13  | 0·16  | 0·18  |
|                                            | Cerebrovascular diseases                     | 0·00 | 0·00 | 0·00 | 0·00  | 0·00  | 0·00  | 0·00  | 0·00  | 0·00  | 0·01  | 0·01  | 0·02  | 0·03  | 0·04  | 0·05  | 0·07  |
|                                            | Congenital malformations                     | 0·03 | 0·00 | 0·00 | 0·00  | 0·00  | 0·00  | 0·00  | 0·00  | 0·00  | 0·00  | 0·00  | 0·00  | 0·00  | 0·00  | 0·00  | 0·00  |



| Country  | Cause Group                                  | 0-1  | 1-4  | 5-9  | 10-14 | 15-19 | 20-24 | 25-29 | 30-34 | 35-39 | 40-44 | 45-49 | 50-54 | 55-59 | 60-64 | 65-69 | 70-74 |
|----------|----------------------------------------------|------|------|------|-------|-------|-------|-------|-------|-------|-------|-------|-------|-------|-------|-------|-------|
|          | Diseases of the digestive system             | 0.00 | 0.00 | 0.00 | 0.00  | 0.00  | 0.00  | 0.00  | 0.00  | 0.00  | 0.00  | 0.00  | 0.00  | 0.01  | 0.01  | 0.01  | 0.01  |
|          | Diseases of the genitourinary system         | 0.00 | 0.00 | 0.00 | 0.00  | 0.00  | 0.00  | 0.00  | 0.00  | 0.00  | 0.00  | 0.00  | 0.00  | 0.00  | 0.01  | 0.01  | 0.01  |
|          | Diseases of the nervous system               | 0.00 | 0.00 | 0.00 | 0.00  | 0.00  | 0.00  | 0.00  | 0.00  | 0.00  | 0.00  | 0.00  | 0.00  | 0.00  | 0.00  | 0.00  | 0.00  |
|          | Diseases of the respiratory system           | 0.00 | 0.00 | 0.00 | 0.00  | 0.00  | 0.00  | 0.00  | 0.00  | 0.00  | 0.01  | 0.01  | 0.03  | 0.05  | 0.07  | 0.11  | 0.14  |
|          | Endocrine and metabolic diseases             | 0.00 | 0.00 | 0.00 | 0.00  | 0.00  | 0.00  | 0.00  | 0.00  | 0.00  | 0.00  | 0.00  | 0.01  | 0.01  | 0.02  | 0.02  | 0.02  |
|          | Infectious diseases                          | 0.01 | 0.01 | 0.00 | 0.00  | 0.00  | 0.00  | 0.00  | 0.00  | 0.00  | 0.01  | 0.01  | 0.01  | 0.01  | 0.01  | 0.02  | 0.02  |
|          | Injuries                                     | 0.01 | 0.02 | 0.01 | 0.02  | 0.08  | 0.14  | 0.13  | 0.12  | 0.11  | 0.11  | 0.11  | 0.10  | 0.09  | 0.07  | 0.06  | 0.05  |
|          | Nonavoidable deaths                          | 0.00 | 0.00 | 0.00 | 0.00  | 0.00  | 0.00  | 0.00  | 0.00  | 0.00  | 0.00  | 0.00  | 0.00  | 0.00  | 0.00  | 0.00  | 0.00  |
|          | Pregnancy, childbirth and perinatal period   | 0.16 | 0.00 | 0.00 | 0.00  | 0.00  | 0.00  | 0.00  | 0.00  | 0.00  | 0.00  | 0.00  | 0.00  | 0.00  | 0.00  | 0.00  | 0.00  |
| Bulgaria | Adverse effects of medical and surgical care | 0.00 | 0.00 | 0.00 | 0.00  | 0.00  | 0.00  | 0.00  | 0.00  | 0.00  | 0.00  | 0.00  | 0.00  | 0.00  | 0.00  | 0.00  | 0.00  |
|          | Alcohol- related and drug related deaths     | 0.00 | 0.00 | 0.00 | 0.00  | 0.00  | 0.01  | 0.01  | 0.02  | 0.03  | 0.05  | 0.07  | 0.09  | 0.09  | 0.08  | 0.06  | 0.03  |
|          | Cancer                                       | 0.00 | 0.00 | 0.00 | 0.00  | 0.00  | 0.01  | 0.01  | 0.02  | 0.03  | 0.06  | 0.11  | 0.20  | 0.28  | 0.32  | 0.31  | 0.24  |
|          | Cardiovascular diseases                      | 0.00 | 0.00 | 0.00 | 0.00  | 0.00  | 0.01  | 0.01  | 0.02  | 0.05  | 0.10  | 0.17  | 0.25  | 0.33  | 0.39  | 0.40  | 0.39  |
|          | Cerebrovascular diseases                     | 0.01 | 0.00 | 0.00 | 0.00  | 0.00  | 0.00  | 0.01  | 0.01  | 0.02  | 0.04  | 0.07  | 0.11  | 0.16  | 0.22  | 0.28  | 0.31  |
|          | Congenital malformations                     | 0.07 | 0.01 | 0.00 | 0.00  | 0.00  | 0.00  | 0.00  | 0.00  | 0.00  | 0.00  | 0.00  | 0.00  | 0.00  | 0.00  | 0.00  | 0.00  |
|          | Diseases of the digestive system             | 0.00 | 0.00 | 0.00 | 0.00  | 0.00  | 0.00  | 0.00  | 0.00  | 0.01  | 0.01  | 0.01  | 0.01  | 0.01  | 0.01  | 0.01  | 0.01  |
|          | Diseases of the genitourinary system         | 0.00 | 0.00 | 0.00 | 0.00  | 0.00  | 0.00  | 0.00  | 0.00  | 0.01  | 0.01  | 0.01  | 0.01  | 0.02  | 0.02  | 0.02  | 0.02  |
|          | Diseases of the nervous system               | 0.00 | 0.00 | 0.00 | 0.00  | 0.00  | 0.00  | 0.00  | 0.00  | 0.00  | 0.00  | 0.00  | 0.00  | 0.00  | 0.00  | 0.00  | 0.00  |
|          | Diseases of the respiratory system           | 0.08 | 0.02 | 0.01 | 0.01  | 0.01  | 0.01  | 0.01  | 0.01  | 0.01  | 0.02  | 0.03  | 0.04  | 0.05  | 0.06  | 0.06  | 0.06  |
|          | Endocrine and metabolic diseases             | 0.00 | 0.00 | 0.00 | 0.00  | 0.00  | 0.00  | 0.00  | 0.00  | 0.00  | 0.01  | 0.01  | 0.01  | 0.02  | 0.03  | 0.03  | 0.03  |
|          | Infectious diseases                          | 0.02 | 0.01 | 0.00 | 0.00  | 0.00  | 0.00  | 0.01  | 0.01  | 0.01  | 0.01  | 0.01  | 0.01  | 0.02  | 0.01  | 0.01  | 0.01  |
|          | Injuries                                     | 0.02 | 0.02 | 0.02 | 0.03  | 0.10  | 0.13  | 0.11  | 0.10  | 0.09  | 0.09  | 0.09  | 0.09  | 0.08  | 0.06  | 0.04  | 0.03  |

| Country | Cause Group                                  | 0-1  | 1-4  | 5-9  | 10-14 | 15-19 | 20-24 | 25-29 | 30-34 | 35-39 | 40-44 | 45-49 | 50-54 | 55-59 | 60-64 | 65-69 | 70-74 |
|---------|----------------------------------------------|------|------|------|-------|-------|-------|-------|-------|-------|-------|-------|-------|-------|-------|-------|-------|
| Croatia | Nonavoidable deaths                          | 0.00 | 0.00 | 0.00 | 0.00  | 0.00  | 0.00  | 0.00  | 0.00  | 0.00  | 0.00  | 0.00  | 0.00  | 0.00  | 0.00  | 0.00  | 0.00  |
|         | Pregnancy, childbirth and perinatal period   | 0.30 | 0.00 | 0.00 | 0.00  | 0.00  | 0.00  | 0.00  | 0.00  | 0.00  | 0.00  | 0.00  | 0.00  | 0.00  | 0.00  | 0.00  | 0.00  |
|         | Adverse effects of medical and surgical care | 0.00 | 0.00 | 0.00 | 0.00  | 0.00  | 0.00  | 0.00  | 0.00  | 0.00  | 0.00  | 0.00  | 0.00  | 0.00  | 0.00  | 0.00  | 0.00  |
|         | Alcohol- related and drug related deaths     | 0.00 | 0.00 | 0.00 | 0.00  | 0.00  | 0.01  | 0.02  | 0.03  | 0.04  | 0.06  | 0.09  | 0.11  | 0.12  | 0.11  | 0.10  | 0.07  |
|         | Cancer                                       | 0.00 | 0.00 | 0.00 | 0.00  | 0.00  | 0.01  | 0.01  | 0.02  | 0.03  | 0.06  | 0.12  | 0.24  | 0.36  | 0.44  | 0.45  | 0.41  |
|         | Cardiovascular diseases                      | 0.00 | 0.00 | 0.00 | 0.00  | 0.00  | 0.00  | 0.00  | 0.01  | 0.03  | 0.06  | 0.12  | 0.18  | 0.25  | 0.31  | 0.36  | 0.39  |
|         | Cerebrovascular diseases                     | 0.00 | 0.00 | 0.00 | 0.00  | 0.00  | 0.00  | 0.00  | 0.00  | 0.01  | 0.02  | 0.03  | 0.06  | 0.09  | 0.13  | 0.17  | 0.22  |
|         | Congenital malformations                     | 0.04 | 0.00 | 0.00 | 0.00  | 0.00  | 0.00  | 0.00  | 0.00  | 0.00  | 0.00  | 0.00  | 0.00  | 0.00  | 0.00  | 0.00  | 0.00  |
|         | Diseases of the digestive system             | 0.00 | 0.00 | 0.00 | 0.00  | 0.00  | 0.00  | 0.00  | 0.00  | 0.00  | 0.00  | 0.01  | 0.01  | 0.01  | 0.01  | 0.01  | 0.02  |
|         | Diseases of the genitourinary system         | 0.00 | 0.00 | 0.00 | 0.00  | 0.00  | 0.00  | 0.00  | 0.00  | 0.00  | 0.00  | 0.00  | 0.00  | 0.01  | 0.01  | 0.01  | 0.01  |
|         | Diseases of the nervous system               | 0.00 | 0.00 | 0.00 | 0.00  | 0.00  | 0.00  | 0.00  | 0.00  | 0.00  | 0.01  | 0.01  | 0.01  | 0.00  | 0.00  | 0.00  | 0.00  |
|         | Diseases of the respiratory system           | 0.00 | 0.00 | 0.00 | 0.00  | 0.00  | 0.00  | 0.00  | 0.00  | 0.00  | 0.01  | 0.02  | 0.02  | 0.03  | 0.05  | 0.07  | 0.09  |
|         | Endocrine and metabolic diseases             | 0.00 | 0.00 | 0.00 | 0.00  | 0.00  | 0.00  | 0.00  | 0.00  | 0.00  | 0.00  | 0.01  | 0.01  | 0.02  | 0.04  | 0.05  | 0.05  |
|         | Infectious diseases                          | 0.00 | 0.01 | 0.00 | 0.00  | 0.00  | 0.00  | 0.00  | 0.00  | 0.01  | 0.01  | 0.01  | 0.01  | 0.01  | 0.01  | 0.01  | 0.01  |
|         | Injuries                                     | 0.01 | 0.02 | 0.02 | 0.02  | 0.11  | 0.16  | 0.12  | 0.10  | 0.10  | 0.10  | 0.11  | 0.11  | 0.10  | 0.08  | 0.07  | 0.06  |
| Cyprus  | Nonavoidable deaths                          | 0.00 | 0.00 | 0.00 | 0.00  | 0.00  | 0.00  | 0.00  | 0.00  | 0.00  | 0.00  | 0.00  | 0.00  | 0.00  | 0.00  | 0.00  | 0.00  |
|         | Pregnancy, childbirth and perinatal period   | 0.21 | 0.00 | 0.00 | 0.00  | 0.00  | 0.00  | 0.00  | 0.00  | 0.00  | 0.00  | 0.00  | 0.00  | 0.00  | 0.00  | 0.00  | 0.00  |
|         | Adverse effects of medical and surgical care | 0.00 | 0.00 | 0.00 | 0.00  | 0.00  | 0.00  | 0.00  | 0.00  | 0.00  | 0.00  | 0.00  | 0.00  | 0.00  | 0.00  | 0.00  | 0.00  |
|         | Alcohol- related and drug related deaths     | 0.00 | 0.00 | 0.00 | 0.00  | 0.00  | 0.01  | 0.01  | 0.02  | 0.02  | 0.02  | 0.01  | 0.02  | 0.02  | 0.02  | 0.02  | 0.02  |
|         | Cancer                                       | 0.00 | 0.00 | 0.00 | 0.00  | 0.00  | 0.01  | 0.00  | 0.01  | 0.02  | 0.02  | 0.05  | 0.08  | 0.13  | 0.22  | 0.26  | 0.27  |
|         | Cardiovascular diseases                      | 0.00 | 0.00 | 0.00 | 0.00  | 0.00  | 0.00  | 0.01  | 0.02  | 0.03  | 0.08  | 0.10  | 0.15  | 0.19  | 0.22  | 0.25  | 0.29  |
|         | Cerebrovascular diseases                     | 0.00 | 0.00 | 0.00 | 0.00  | 0.00  | 0.00  | 0.00  | 0.01  | 0.00  | 0.01  | 0.01  | 0.02  | 0.02  | 0.04  | 0.05  | 0.08  |

| Country                          | Cause Group                                  | 0-1  | 1-4  | 5-9  | 10-14 | 15-19 | 20-24 | 25-29 | 30-34 | 35-39 | 40-44 | 45-49 | 50-54 | 55-59 | 60-64 | 65-69 | 70-74 |      |
|----------------------------------|----------------------------------------------|------|------|------|-------|-------|-------|-------|-------|-------|-------|-------|-------|-------|-------|-------|-------|------|
| Czech Republic                   | Congenital malformations                     | 0.02 | 0.00 | 0.00 | 0.00  | 0.00  | 0.00  | 0.00  | 0.00  | 0.00  | 0.00  | 0.00  | 0.00  | 0.00  | 0.00  | 0.00  | 0.00  |      |
|                                  | Diseases of the digestive system             | 0.00 | 0.00 | 0.00 | 0.00  | 0.00  | 0.00  | 0.00  | 0.00  | 0.00  | 0.00  | 0.00  | 0.00  | 0.00  | 0.00  | 0.01  | 0.01  | 0.01 |
|                                  | Diseases of the genitourinary system         | 0.00 | 0.00 | 0.00 | 0.00  | 0.00  | 0.00  | 0.00  | 0.00  | 0.00  | 0.00  | 0.00  | 0.00  | 0.00  | 0.01  | 0.01  | 0.02  | 0.02 |
|                                  | Diseases of the nervous system               | 0.00 | 0.00 | 0.00 | 0.00  | 0.00  | 0.00  | 0.00  | 0.00  | 0.00  | 0.00  | 0.00  | 0.00  | 0.00  | 0.00  | 0.00  | 0.00  | 0.00 |
|                                  | Diseases of the respiratory system           | 0.00 | 0.00 | 0.00 | 0.00  | 0.00  | 0.00  | 0.00  | 0.00  | 0.00  | 0.00  | 0.01  | 0.01  | 0.01  | 0.01  | 0.02  | 0.04  | 0.06 |
|                                  | Endocrine and metabolic diseases             | 0.00 | 0.00 | 0.00 | 0.00  | 0.00  | 0.00  | 0.00  | 0.00  | 0.00  | 0.00  | 0.00  | 0.01  | 0.01  | 0.03  | 0.04  | 0.07  | 0.10 |
|                                  | Infectious diseases                          | 0.01 | 0.00 | 0.00 | 0.00  | 0.00  | 0.00  | 0.00  | 0.00  | 0.00  | 0.00  | 0.01  | 0.00  | 0.01  | 0.01  | 0.01  | 0.01  | 0.02 |
|                                  | Injuries                                     | 0.01 | 0.01 | 0.01 | 0.01  | 0.10  | 0.16  | 0.12  | 0.10  | 0.09  | 0.08  | 0.07  | 0.05  | 0.04  | 0.04  | 0.04  | 0.04  | 0.04 |
|                                  | Nonavoidable deaths                          | 0.00 | 0.00 | 0.00 | 0.00  | 0.00  | 0.00  | 0.00  | 0.00  | 0.00  | 0.00  | 0.00  | 0.00  | 0.00  | 0.00  | 0.00  | 0.00  | 0.00 |
|                                  | Pregnancy, childbirth and perinatal period   | 0.17 | 0.00 | 0.00 | 0.00  | 0.00  | 0.00  | 0.00  | 0.00  | 0.00  | 0.00  | 0.00  | 0.00  | 0.00  | 0.00  | 0.00  | 0.00  | 0.00 |
|                                  | Adverse effects of medical and surgical care | 0.00 | 0.00 | 0.00 | 0.00  | 0.00  | 0.00  | 0.00  | 0.00  | 0.00  | 0.00  | 0.00  | 0.00  | 0.00  | 0.00  | 0.00  | 0.00  | 0.00 |
|                                  | Alcohol- related and drug related deaths     | 0.00 | 0.00 | 0.00 | 0.00  | 0.00  | 0.01  | 0.01  | 0.02  | 0.03  | 0.05  | 0.08  | 0.09  | 0.09  | 0.08  | 0.06  | 0.06  | 0.03 |
|                                  | Cancer                                       | 0.00 | 0.00 | 0.00 | 0.00  | 0.00  | 0.00  | 0.01  | 0.01  | 0.02  | 0.04  | 0.08  | 0.15  | 0.26  | 0.36  | 0.40  | 0.36  | 0.36 |
|                                  | Cardiovascular diseases                      | 0.00 | 0.00 | 0.00 | 0.00  | 0.00  | 0.00  | 0.00  | 0.01  | 0.02  | 0.05  | 0.10  | 0.17  | 0.26  | 0.36  | 0.43  | 0.48  | 0.48 |
|                                  | Cerebrovascular diseases                     | 0.00 | 0.00 | 0.00 | 0.00  | 0.00  | 0.00  | 0.00  | 0.00  | 0.01  | 0.01  | 0.02  | 0.03  | 0.05  | 0.07  | 0.10  | 0.13  | 0.13 |
|                                  | Congenital malformations                     | 0.02 | 0.00 | 0.00 | 0.00  | 0.00  | 0.00  | 0.00  | 0.00  | 0.00  | 0.00  | 0.00  | 0.00  | 0.00  | 0.00  | 0.00  | 0.00  | 0.00 |
|                                  | Diseases of the digestive system             | 0.00 | 0.00 | 0.00 | 0.00  | 0.00  | 0.00  | 0.00  | 0.00  | 0.00  | 0.00  | 0.01  | 0.01  | 0.01  | 0.02  | 0.02  | 0.02  | 0.02 |
|                                  | Diseases of the genitourinary system         | 0.00 | 0.00 | 0.00 | 0.00  | 0.00  | 0.00  | 0.00  | 0.00  | 0.00  | 0.00  | 0.00  | 0.00  | 0.00  | 0.01  | 0.01  | 0.01  | 0.01 |
|                                  | Diseases of the nervous system               | 0.00 | 0.00 | 0.00 | 0.00  | 0.00  | 0.00  | 0.00  | 0.00  | 0.00  | 0.00  | 0.00  | 0.00  | 0.00  | 0.00  | 0.00  | 0.00  | 0.00 |
|                                  | Diseases of the respiratory system           | 0.01 | 0.00 | 0.00 | 0.00  | 0.00  | 0.01  | 0.01  | 0.01  | 0.01  | 0.01  | 0.01  | 0.02  | 0.04  | 0.06  | 0.08  | 0.10  | 0.11 |
| Endocrine and metabolic diseases | 0.00                                         | 0.00 | 0.00 | 0.00 | 0.00  | 0.00  | 0.00  | 0.00  | 0.00  | 0.00  | 0.00  | 0.01  | 0.01  | 0.02  | 0.03  | 0.04  | 0.05  |      |
| Infectious diseases              | 0.00                                         | 0.00 | 0.00 | 0.00 | 0.00  | 0.00  | 0.00  | 0.00  | 0.00  | 0.00  | 0.00  | 0.01  | 0.01  | 0.01  | 0.01  | 0.02  | 0.02  |      |

| Country                                  | Cause Group                                  | 0-1                                          | 1-4  | 5-9  | 10-14 | 15-19 | 20-24 | 25-29 | 30-34 | 35-39 | 40-44 | 45-49 | 50-54 | 55-59 | 60-64 | 65-69 | 70-74 |
|------------------------------------------|----------------------------------------------|----------------------------------------------|------|------|-------|-------|-------|-------|-------|-------|-------|-------|-------|-------|-------|-------|-------|
| Denmark                                  | Injuries                                     | 0.01                                         | 0.01 | 0.01 | 0.02  | 0.10  | 0.15  | 0.13  | 0.11  | 0.11  | 0.11  | 0.11  | 0.12  | 0.10  | 0.08  | 0.06  | 0.05  |
|                                          | Nonavoidable deaths                          | 0.00                                         | 0.00 | 0.00 | 0.00  | 0.00  | 0.00  | 0.00  | 0.00  | 0.00  | 0.00  | 0.00  | 0.00  | 0.00  | 0.00  | 0.00  | 0.00  |
|                                          | Pregnancy, childbirth and perinatal period   | 0.14                                         | 0.00 | 0.00 | 0.00  | 0.00  | 0.00  | 0.00  | 0.00  | 0.00  | 0.00  | 0.00  | 0.00  | 0.00  | 0.00  | 0.00  | 0.00  |
|                                          | Adverse effects of medical and surgical care | 0.00                                         | 0.00 | 0.00 | 0.00  | 0.00  | 0.00  | 0.00  | 0.00  | 0.00  | 0.00  | 0.00  | 0.00  | 0.00  | 0.00  | 0.00  | 0.00  |
|                                          | Alcohol- related and drug related deaths     | 0.00                                         | 0.00 | 0.00 | 0.00  | 0.01  | 0.02  | 0.03  | 0.04  | 0.05  | 0.07  | 0.10  | 0.14  | 0.14  | 0.12  | 0.08  | 0.05  |
|                                          | Cancer                                       | 0.00                                         | 0.00 | 0.00 | 0.00  | 0.00  | 0.00  | 0.01  | 0.01  | 0.02  | 0.03  | 0.06  | 0.12  | 0.20  | 0.28  | 0.34  | 0.35  |
|                                          | Cardiovascular diseases                      | 0.00                                         | 0.00 | 0.00 | 0.00  | 0.00  | 0.00  | 0.00  | 0.01  | 0.01  | 0.02  | 0.04  | 0.07  | 0.09  | 0.13  | 0.16  | 0.20  |
|                                          | Cerebrovascular diseases                     | 0.00                                         | 0.00 | 0.00 | 0.00  | 0.00  | 0.00  | 0.00  | 0.00  | 0.00  | 0.01  | 0.01  | 0.02  | 0.03  | 0.04  | 0.06  | 0.08  |
|                                          | Congenital malformations                     | 0.02                                         | 0.00 | 0.00 | 0.00  | 0.00  | 0.00  | 0.00  | 0.00  | 0.00  | 0.00  | 0.00  | 0.00  | 0.00  | 0.00  | 0.00  | 0.00  |
|                                          | Diseases of the digestive system             | 0.00                                         | 0.00 | 0.00 | 0.00  | 0.00  | 0.00  | 0.00  | 0.00  | 0.00  | 0.00  | 0.00  | 0.01  | 0.01  | 0.01  | 0.01  | 0.01  |
|                                          | Diseases of the genitourinary system         | 0.00                                         | 0.00 | 0.00 | 0.00  | 0.00  | 0.00  | 0.00  | 0.00  | 0.00  | 0.00  | 0.00  | 0.00  | 0.00  | 0.01  | 0.01  | 0.01  |
|                                          | Diseases of the nervous system               | 0.00                                         | 0.00 | 0.00 | 0.00  | 0.00  | 0.00  | 0.00  | 0.00  | 0.00  | 0.00  | 0.00  | 0.00  | 0.00  | 0.00  | 0.00  | 0.00  |
|                                          | Diseases of the respiratory system           | 0.00                                         | 0.00 | 0.00 | 0.00  | 0.00  | 0.00  | 0.00  | 0.00  | 0.00  | 0.01  | 0.01  | 0.03  | 0.04  | 0.07  | 0.09  | 0.12  |
|                                          | Endocrine and metabolic diseases             | 0.00                                         | 0.00 | 0.00 | 0.00  | 0.00  | 0.00  | 0.00  | 0.00  | 0.00  | 0.01  | 0.01  | 0.02  | 0.03  | 0.03  | 0.04  | 0.05  |
|                                          | Infectious diseases                          | 0.00                                         | 0.00 | 0.00 | 0.00  | 0.00  | 0.00  | 0.00  | 0.00  | 0.00  | 0.00  | 0.01  | 0.01  | 0.01  | 0.01  | 0.01  | 0.01  |
|                                          | Injuries                                     | 0.01                                         | 0.01 | 0.01 | 0.01  | 0.06  | 0.07  | 0.06  | 0.05  | 0.05  | 0.06  | 0.06  | 0.06  | 0.06  | 0.05  | 0.04  | 0.03  |
|                                          | Nonavoidable deaths                          | 0.00                                         | 0.00 | 0.00 | 0.00  | 0.00  | 0.00  | 0.00  | 0.00  | 0.00  | 0.00  | 0.00  | 0.00  | 0.00  | 0.00  | 0.00  | 0.00  |
|                                          | Pregnancy, childbirth and perinatal period   | 0.16                                         | 0.00 | 0.00 | 0.00  | 0.00  | 0.00  | 0.00  | 0.00  | 0.00  | 0.00  | 0.00  | 0.00  | 0.00  | 0.00  | 0.00  | 0.00  |
|                                          | Estonia                                      | Adverse effects of medical and surgical care | 0.00 | 0.00 | 0.00  | 0.00  | 0.00  | 0.00  | 0.00  | 0.00  | 0.00  | 0.00  | 0.00  | 0.00  | 0.00  | 0.00  | 0.00  |
| Alcohol- related and drug related deaths |                                              | 0.00                                         | 0.00 | 0.00 | 0.00  | 0.02  | 0.09  | 0.17  | 0.19  | 0.16  | 0.19  | 0.22  | 0.26  | 0.24  | 0.18  | 0.12  |       |
| Cancer                                   |                                              | 0.00                                         | 0.00 | 0.00 | 0.00  | 0.00  | 0.00  | 0.01  | 0.01  | 0.02  | 0.04  | 0.09  | 0.16  | 0.26  | 0.36  | 0.40  |       |
| Cardiovascular diseases                  |                                              | 0.00                                         | 0.00 | 0.00 | 0.00  | 0.00  | 0.01  | 0.01  | 0.02  | 0.03  | 0.07  | 0.16  | 0.26  | 0.40  | 0.55  | 0.62  |       |

| Country | Cause Group                                  | 0-1  | 1-4  | 5-9  | 10-14 | 15-19 | 20-24 | 25-29 | 30-34 | 35-39 | 40-44 | 45-49 | 50-54 | 55-59 | 60-64 | 65-69 | 70-74 |
|---------|----------------------------------------------|------|------|------|-------|-------|-------|-------|-------|-------|-------|-------|-------|-------|-------|-------|-------|
|         | Cerebrovascular diseases                     | 0.00 | 0.00 | 0.00 | 0.00  | 0.00  | 0.01  | 0.01  | 0.01  | 0.01  | 0.02  | 0.04  | 0.05  | 0.07  | 0.11  | 0.14  | 0.15  |
|         | Congenital malformations                     | 0.04 | 0.01 | 0.00 | 0.00  | 0.00  | 0.00  | 0.00  | 0.00  | 0.00  | 0.00  | 0.00  | 0.00  | 0.00  | 0.00  | 0.00  | 0.00  |
|         | Diseases of the digestive system             | 0.00 | 0.00 | 0.00 | 0.00  | 0.00  | 0.00  | 0.00  | 0.01  | 0.01  | 0.01  | 0.02  | 0.02  | 0.03  | 0.02  | 0.02  | 0.02  |
|         | Diseases of the genitourinary system         | 0.00 | 0.00 | 0.00 | 0.00  | 0.00  | 0.00  | 0.00  | 0.00  | 0.00  | 0.00  | 0.00  | 0.00  | 0.00  | 0.00  | 0.01  | 0.01  |
|         | Diseases of the nervous system               | 0.00 | 0.00 | 0.00 | 0.00  | 0.01  | 0.00  | 0.00  | 0.01  | 0.01  | 0.01  | 0.01  | 0.02  | 0.01  | 0.01  | 0.00  | 0.00  |
|         | Diseases of the respiratory system           | 0.01 | 0.01 | 0.00 | 0.00  | 0.00  | 0.00  | 0.01  | 0.02  | 0.01  | 0.03  | 0.04  | 0.05  | 0.06  | 0.07  | 0.07  | 0.07  |
|         | Endocrine and metabolic diseases             | 0.00 | 0.00 | 0.00 | 0.00  | 0.00  | 0.00  | 0.00  | 0.00  | 0.01  | 0.01  | 0.01  | 0.01  | 0.01  | 0.02  | 0.02  | 0.02  |
|         | Infectious diseases                          | 0.01 | 0.00 | 0.00 | 0.00  | 0.00  | 0.01  | 0.04  | 0.05  | 0.04  | 0.03  | 0.03  | 0.02  | 0.02  | 0.01  | 0.01  | 0.01  |
|         | Injuries                                     | 0.03 | 0.02 | 0.03 | 0.03  | 0.14  | 0.23  | 0.20  | 0.18  | 0.18  | 0.20  | 0.21  | 0.21  | 0.19  | 0.13  | 0.09  | 0.06  |
|         | Nonavoidable deaths                          | 0.00 | 0.00 | 0.00 | 0.00  | 0.00  | 0.00  | 0.00  | 0.00  | 0.00  | 0.00  | 0.00  | 0.00  | 0.00  | 0.00  | 0.00  | 0.00  |
|         | Pregnancy, childbirth and perinatal period   | 0.13 | 0.00 | 0.00 | 0.00  | 0.00  | 0.00  | 0.00  | 0.00  | 0.00  | 0.00  | 0.00  | 0.00  | 0.00  | 0.00  | 0.00  | 0.00  |
| Finland | Adverse effects of medical and surgical care | 0.00 | 0.00 | 0.00 | 0.00  | 0.00  | 0.00  | 0.00  | 0.00  | 0.00  | 0.00  | 0.00  | 0.00  | 0.00  | 0.00  | 0.00  | 0.00  |
|         | Alcohol- related and drug related deaths     | 0.00 | 0.00 | 0.00 | 0.00  | 0.02  | 0.06  | 0.07  | 0.09  | 0.11  | 0.13  | 0.18  | 0.21  | 0.22  | 0.18  | 0.13  | 0.09  |
|         | Cancer                                       | 0.00 | 0.00 | 0.00 | 0.00  | 0.00  | 0.01  | 0.01  | 0.01  | 0.01  | 0.03  | 0.04  | 0.08  | 0.15  | 0.22  | 0.27  | 0.28  |
|         | Cardiovascular diseases                      | 0.00 | 0.00 | 0.00 | 0.00  | 0.00  | 0.00  | 0.00  | 0.01  | 0.02  | 0.04  | 0.07  | 0.13  | 0.21  | 0.29  | 0.36  | 0.40  |
|         | Cerebrovascular diseases                     | 0.00 | 0.00 | 0.00 | 0.00  | 0.00  | 0.00  | 0.00  | 0.00  | 0.01  | 0.01  | 0.02  | 0.03  | 0.04  | 0.06  | 0.08  | 0.10  |
|         | Congenital malformations                     | 0.02 | 0.00 | 0.00 | 0.00  | 0.00  | 0.00  | 0.00  | 0.00  | 0.00  | 0.00  | 0.00  | 0.00  | 0.00  | 0.00  | 0.00  | 0.00  |
|         | Diseases of the digestive system             | 0.00 | 0.00 | 0.00 | 0.00  | 0.00  | 0.00  | 0.00  | 0.00  | 0.01  | 0.01  | 0.01  | 0.02  | 0.02  | 0.02  | 0.02  | 0.01  |
|         | Diseases of the genitourinary system         | 0.00 | 0.00 | 0.00 | 0.00  | 0.00  | 0.00  | 0.00  | 0.00  | 0.00  | 0.00  | 0.00  | 0.00  | 0.00  | 0.00  | 0.00  | 0.00  |
|         | Diseases of the nervous system               | 0.00 | 0.00 | 0.00 | 0.00  | 0.00  | 0.00  | 0.00  | 0.00  | 0.00  | 0.00  | 0.01  | 0.01  | 0.00  | 0.00  | 0.00  | 0.00  |
|         | Diseases of the respiratory system           | 0.00 | 0.00 | 0.00 | 0.00  | 0.00  | 0.00  | 0.00  | 0.00  | 0.00  | 0.01  | 0.01  | 0.01  | 0.03  | 0.04  | 0.06  | 0.07  |
|         | Endocrine and metabolic diseases             | 0.00 | 0.00 | 0.00 | 0.00  | 0.00  | 0.00  | 0.00  | 0.00  | 0.00  | 0.01  | 0.01  | 0.01  | 0.01  | 0.01  | 0.02  | 0.02  |

| Country                                      | Cause Group                                  | 0-1  | 1-4  | 5-9  | 10-14 | 15-19 | 20-24 | 25-29 | 30-34 | 35-39 | 40-44 | 45-49 | 50-54 | 55-59 | 60-64 | 65-69 | 70-74 |
|----------------------------------------------|----------------------------------------------|------|------|------|-------|-------|-------|-------|-------|-------|-------|-------|-------|-------|-------|-------|-------|
| France                                       | Infectious diseases                          | 0·00 | 0·00 | 0·00 | 0·00  | 0·00  | 0·00  | 0·00  | 0·00  | 0·00  | 0·00  | 0·00  | 0·00  | 0·00  | 0·01  | 0·01  | 0·01  |
|                                              | Injuries                                     | 0·00 | 0·01 | 0·01 | 0·01  | 0·11  | 0·15  | 0·13  | 0·11  | 0·10  | 0·10  | 0·11  | 0·11  | 0·10  | 0·09  | 0·08  | 0·07  |
|                                              | Nonavoidable deaths                          | 0·00 | 0·00 | 0·00 | 0·00  | 0·00  | 0·00  | 0·00  | 0·00  | 0·00  | 0·00  | 0·00  | 0·00  | 0·00  | 0·00  | 0·00  | 0·00  |
|                                              | Pregnancy, childbirth and perinatal period   | 0·09 | 0·00 | 0·00 | 0·00  | 0·00  | 0·00  | 0·00  | 0·00  | 0·00  | 0·00  | 0·00  | 0·00  | 0·00  | 0·00  | 0·00  | 0·00  |
|                                              | Adverse effects of medical and surgical care | 0·00 | 0·00 | 0·00 | 0·00  | 0·00  | 0·00  | 0·00  | 0·00  | 0·00  | 0·00  | 0·00  | 0·00  | 0·00  | 0·00  | 0·00  | 0·00  |
|                                              | Alcohol- related and drug related deaths     | 0·00 | 0·00 | 0·00 | 0·00  | 0·00  | 0·01  | 0·01  | 0·02  | 0·03  | 0·05  | 0·07  | 0·08  | 0·08  | 0·07  | 0·05  | 0·04  |
|                                              | Cancer                                       | 0·00 | 0·00 | 0·00 | 0·00  | 0·00  | 0·00  | 0·01  | 0·01  | 0·02  | 0·05  | 0·11  | 0·22  | 0·31  | 0·37  | 0·38  | 0·37  |
|                                              | Cardiovascular diseases                      | 0·00 | 0·00 | 0·00 | 0·00  | 0·00  | 0·00  | 0·00  | 0·01  | 0·01  | 0·03  | 0·04  | 0·06  | 0·09  | 0·10  | 0·12  | 0·14  |
|                                              | Cerebrovascular diseases                     | 0·00 | 0·00 | 0·00 | 0·00  | 0·00  | 0·00  | 0·00  | 0·00  | 0·01  | 0·01  | 0·01  | 0·02  | 0·03  | 0·03  | 0·04  | 0·06  |
|                                              | Congenital malformations                     | 0·03 | 0·00 | 0·00 | 0·00  | 0·00  | 0·00  | 0·00  | 0·00  | 0·00  | 0·00  | 0·00  | 0·00  | 0·00  | 0·00  | 0·00  | 0·00  |
|                                              | Diseases of the digestive system             | 0·00 | 0·00 | 0·00 | 0·00  | 0·00  | 0·00  | 0·00  | 0·00  | 0·00  | 0·00  | 0·00  | 0·00  | 0·01  | 0·01  | 0·01  | 0·01  |
|                                              | Diseases of the genitourinary system         | 0·00 | 0·00 | 0·00 | 0·00  | 0·00  | 0·00  | 0·00  | 0·00  | 0·00  | 0·00  | 0·00  | 0·00  | 0·00  | 0·01  | 0·01  | 0·01  |
|                                              | Diseases of the nervous system               | 0·00 | 0·00 | 0·00 | 0·00  | 0·00  | 0·00  | 0·00  | 0·00  | 0·00  | 0·00  | 0·00  | 0·00  | 0·00  | 0·00  | 0·00  | 0·00  |
|                                              | Diseases of the respiratory system           | 0·00 | 0·00 | 0·00 | 0·00  | 0·00  | 0·00  | 0·00  | 0·00  | 0·00  | 0·01  | 0·01  | 0·02  | 0·02  | 0·03  | 0·04  | 0·06  |
|                                              | Endocrine and metabolic diseases             | 0·00 | 0·00 | 0·00 | 0·00  | 0·00  | 0·00  | 0·00  | 0·00  | 0·00  | 0·00  | 0·01  | 0·01  | 0·01  | 0·02  | 0·03  | 0·03  |
|                                              | Infectious diseases                          | 0·01 | 0·00 | 0·00 | 0·00  | 0·00  | 0·00  | 0·00  | 0·00  | 0·01  | 0·01  | 0·01  | 0·01  | 0·01  | 0·01  | 0·02  | 0·02  |
|                                              | Injuries                                     | 0·01 | 0·02 | 0·01 | 0·01  | 0·08  | 0·13  | 0·11  | 0·10  | 0·10  | 0·11  | 0·11  | 0·10  | 0·08  | 0·06  | 0·06  | 0·06  |
|                                              | Nonavoidable deaths                          | 0·00 | 0·00 | 0·00 | 0·00  | 0·00  | 0·00  | 0·00  | 0·00  | 0·00  | 0·00  | 0·00  | 0·00  | 0·00  | 0·00  | 0·00  | 0·00  |
|                                              | Pregnancy, childbirth and perinatal period   | 0·16 | 0·00 | 0·00 | 0·00  | 0·00  | 0·00  | 0·00  | 0·00  | 0·00  | 0·00  | 0·00  | 0·00  | 0·00  | 0·00  | 0·00  | 0·00  |
| Adverse effects of medical and surgical care | 0·00                                         | 0·00 | 0·00 | 0·00 | 0·00  | 0·00  | 0·00  | 0·00  | 0·00  | 0·00  | 0·00  | 0·00  | 0·00  | 0·00  | 0·00  | 0·00  |       |
| Alcohol- related and drug related deaths     | 0·00                                         | 0·00 | 0·00 | 0·00 | 0·00  | 0·01  | 0·02  | 0·03  | 0·04  | 0·05  | 0·07  | 0·09  | 0·09  | 0·09  | 0·07  | 0·05  |       |
| Cancer                                       | 0·00                                         | 0·00 | 0·00 | 0·00 | 0·00  | 0·00  | 0·01  | 0·01  | 0·02  | 0·03  | 0·07  | 0·14  | 0·23  | 0·30  | 0·33  | 0·32  |       |
| Germany                                      |                                              |      |      |      |       |       |       |       |       |       |       |       |       |       |       |       |       |

| Country | Cause Group                                  | 0-1  | 1-4  | 5-9  | 10-14 | 15-19 | 20-24 | 25-29 | 30-34 | 35-39 | 40-44 | 45-49 | 50-54 | 55-59 | 60-64 | 65-69 | 70-74 |
|---------|----------------------------------------------|------|------|------|-------|-------|-------|-------|-------|-------|-------|-------|-------|-------|-------|-------|-------|
|         | Cardiovascular diseases                      | 0.00 | 0.00 | 0.00 | 0.00  | 0.00  | 0.00  | 0.00  | 0.01  | 0.02  | 0.04  | 0.07  | 0.11  | 0.16  | 0.21  | 0.25  | 0.30  |
|         | Cerebrovascular diseases                     | 0.00 | 0.00 | 0.00 | 0.00  | 0.00  | 0.00  | 0.00  | 0.00  | 0.00  | 0.01  | 0.01  | 0.02  | 0.03  | 0.04  | 0.06  | 0.08  |
|         | Congenital malformations                     | 0.03 | 0.00 | 0.00 | 0.00  | 0.00  | 0.00  | 0.00  | 0.00  | 0.00  | 0.00  | 0.00  | 0.00  | 0.00  | 0.00  | 0.00  | 0.00  |
|         | Diseases of the digestive system             | 0.00 | 0.00 | 0.00 | 0.00  | 0.00  | 0.00  | 0.00  | 0.00  | 0.00  | 0.00  | 0.00  | 0.01  | 0.01  | 0.01  | 0.01  | 0.01  |
|         | Diseases of the genitourinary system         | 0.00 | 0.00 | 0.00 | 0.00  | 0.00  | 0.00  | 0.00  | 0.00  | 0.00  | 0.00  | 0.00  | 0.00  | 0.00  | 0.01  | 0.01  | 0.02  |
|         | Diseases of the nervous system               | 0.00 | 0.00 | 0.00 | 0.00  | 0.00  | 0.00  | 0.00  | 0.00  | 0.00  | 0.00  | 0.00  | 0.00  | 0.00  | 0.00  | 0.00  | 0.00  |
|         | Diseases of the respiratory system           | 0.00 | 0.00 | 0.00 | 0.00  | 0.00  | 0.00  | 0.00  | 0.00  | 0.00  | 0.01  | 0.01  | 0.02  | 0.04  | 0.06  | 0.09  | 0.11  |
|         | Endocrine and metabolic diseases             | 0.00 | 0.00 | 0.00 | 0.00  | 0.00  | 0.00  | 0.00  | 0.00  | 0.00  | 0.00  | 0.01  | 0.01  | 0.02  | 0.03  | 0.03  | 0.04  |
|         | Infectious diseases                          | 0.00 | 0.00 | 0.00 | 0.00  | 0.00  | 0.00  | 0.00  | 0.00  | 0.01  | 0.01  | 0.01  | 0.01  | 0.01  | 0.02  | 0.02  | 0.02  |
|         | Injuries                                     | 0.01 | 0.01 | 0.01 | 0.01  | 0.07  | 0.09  | 0.07  | 0.06  | 0.05  | 0.06  | 0.06  | 0.06  | 0.05  | 0.05  | 0.04  | 0.04  |
|         | Nonavoidable deaths                          | 0.00 | 0.00 | 0.00 | 0.00  | 0.00  | 0.00  | 0.00  | 0.00  | 0.00  | 0.00  | 0.00  | 0.00  | 0.00  | 0.00  | 0.00  | 0.00  |
|         | Pregnancy, childbirth and perinatal period   | 0.16 | 0.00 | 0.00 | 0.00  | 0.00  | 0.00  | 0.00  | 0.00  | 0.00  | 0.00  | 0.00  | 0.00  | 0.00  | 0.00  | 0.00  | 0.00  |
| Hungary | Adverse effects of medical and surgical care | 0.00 | 0.00 | 0.00 | 0.00  | 0.00  | 0.00  | 0.00  | 0.00  | 0.00  | 0.00  | 0.00  | 0.00  | 0.00  | 0.00  | 0.00  | 0.00  |
|         | Alcohol- related and drug related deaths     | 0.00 | 0.00 | 0.00 | 0.00  | 0.00  | 0.01  | 0.01  | 0.03  | 0.05  | 0.10  | 0.17  | 0.21  | 0.19  | 0.17  | 0.12  | 0.07  |
|         | Cancer                                       | 0.00 | 0.00 | 0.00 | 0.00  | 0.00  | 0.01  | 0.01  | 0.01  | 0.03  | 0.07  | 0.18  | 0.35  | 0.49  | 0.54  | 0.50  | 0.40  |
|         | Cardiovascular diseases                      | 0.00 | 0.00 | 0.00 | 0.00  | 0.00  | 0.00  | 0.01  | 0.02  | 0.04  | 0.09  | 0.18  | 0.29  | 0.40  | 0.49  | 0.53  | 0.55  |
|         | Cerebrovascular diseases                     | 0.00 | 0.00 | 0.00 | 0.00  | 0.00  | 0.00  | 0.00  | 0.00  | 0.01  | 0.03  | 0.04  | 0.07  | 0.10  | 0.13  | 0.15  | 0.17  |
|         | Congenital malformations                     | 0.05 | 0.00 | 0.00 | 0.00  | 0.00  | 0.00  | 0.00  | 0.00  | 0.00  | 0.00  | 0.00  | 0.00  | 0.00  | 0.00  | 0.00  | 0.00  |
|         | Diseases of the digestive system             | 0.00 | 0.00 | 0.00 | 0.00  | 0.00  | 0.00  | 0.00  | 0.00  | 0.01  | 0.01  | 0.02  | 0.02  | 0.03  | 0.03  | 0.03  | 0.02  |
|         | Diseases of the genitourinary system         | 0.00 | 0.00 | 0.00 | 0.00  | 0.00  | 0.00  | 0.00  | 0.00  | 0.00  | 0.00  | 0.00  | 0.00  | 0.00  | 0.00  | 0.01  | 0.01  |
|         | Diseases of the nervous system               | 0.00 | 0.00 | 0.00 | 0.00  | 0.00  | 0.00  | 0.00  | 0.00  | 0.00  | 0.00  | 0.00  | 0.00  | 0.00  | 0.00  | 0.00  | 0.00  |
|         | Diseases of the respiratory system           | 0.01 | 0.01 | 0.00 | 0.00  | 0.00  | 0.00  | 0.01  | 0.01  | 0.01  | 0.02  | 0.04  | 0.06  | 0.09  | 0.11  | 0.11  | 0.12  |

| Country | Cause Group                                  | 0-1  | 1-4  | 5-9  | 10-14 | 15-19 | 20-24 | 25-29 | 30-34 | 35-39 | 40-44 | 45-49 | 50-54 | 55-59 | 60-64 | 65-69 | 70-74 |
|---------|----------------------------------------------|------|------|------|-------|-------|-------|-------|-------|-------|-------|-------|-------|-------|-------|-------|-------|
|         | Endocrine and metabolic diseases             | 0.00 | 0.00 | 0.00 | 0.00  | 0.00  | 0.00  | 0.00  | 0.00  | 0.00  | 0.01  | 0.01  | 0.02  | 0.03  | 0.04  | 0.04  | 0.04  |
|         | Infectious diseases                          | 0.01 | 0.00 | 0.00 | 0.00  | 0.00  | 0.00  | 0.00  | 0.00  | 0.00  | 0.01  | 0.01  | 0.01  | 0.01  | 0.01  | 0.01  | 0.01  |
|         | Injuries                                     | 0.01 | 0.02 | 0.01 | 0.02  | 0.07  | 0.10  | 0.10  | 0.11  | 0.11  | 0.13  | 0.15  | 0.15  | 0.13  | 0.10  | 0.08  | 0.06  |
|         | Nonavoidable deaths                          | 0.00 | 0.00 | 0.00 | 0.00  | 0.00  | 0.00  | 0.00  | 0.00  | 0.00  | 0.00  | 0.00  | 0.00  | 0.00  | 0.00  | 0.00  | 0.00  |
|         | Pregnancy, childbirth and perinatal period   | 0.23 | 0.00 | 0.00 | 0.00  | 0.00  | 0.00  | 0.00  | 0.00  | 0.00  | 0.00  | 0.00  | 0.00  | 0.00  | 0.00  | 0.00  | 0.00  |
| Ireland | Adverse effects of medical and surgical care | 0.00 | 0.00 | 0.00 | 0.00  | 0.00  | 0.00  | 0.00  | 0.00  | 0.00  | 0.00  | 0.00  | 0.00  | 0.00  | 0.00  | 0.00  | 0.00  |
|         | Alcohol- related and drug related deaths     | 0.00 | 0.00 | 0.00 | 0.00  | 0.01  | 0.03  | 0.04  | 0.05  | 0.05  | 0.06  | 0.05  | 0.05  | 0.05  | 0.04  | 0.03  | 0.02  |
|         | Cancer                                       | 0.00 | 0.00 | 0.00 | 0.00  | 0.00  | 0.00  | 0.01  | 0.01  | 0.02  | 0.04  | 0.06  | 0.11  | 0.18  | 0.26  | 0.32  | 0.35  |
|         | Cardiovascular diseases                      | 0.00 | 0.00 | 0.00 | 0.00  | 0.00  | 0.00  | 0.00  | 0.01  | 0.02  | 0.04  | 0.07  | 0.11  | 0.16  | 0.20  | 0.26  | 0.31  |
|         | Cerebrovascular diseases                     | 0.00 | 0.00 | 0.00 | 0.00  | 0.00  | 0.00  | 0.00  | 0.00  | 0.01  | 0.01  | 0.01  | 0.02  | 0.02  | 0.03  | 0.04  | 0.06  |
|         | Congenital malformations                     | 0.04 | 0.00 | 0.00 | 0.00  | 0.00  | 0.00  | 0.00  | 0.00  | 0.00  | 0.00  | 0.00  | 0.00  | 0.00  | 0.00  | 0.00  | 0.00  |
|         | Diseases of the digestive system             | 0.00 | 0.00 | 0.00 | 0.00  | 0.00  | 0.00  | 0.00  | 0.00  | 0.00  | 0.00  | 0.00  | 0.00  | 0.01  | 0.01  | 0.01  | 0.01  |
|         | Diseases of the genitourinary system         | 0.00 | 0.00 | 0.00 | 0.00  | 0.00  | 0.00  | 0.00  | 0.00  | 0.00  | 0.00  | 0.00  | 0.00  | 0.00  | 0.01  | 0.01  | 0.01  |
|         | Diseases of the nervous system               | 0.00 | 0.00 | 0.00 | 0.00  | 0.00  | 0.00  | 0.00  | 0.00  | 0.00  | 0.00  | 0.00  | 0.00  | 0.00  | 0.00  | 0.00  | 0.00  |
|         | Diseases of the respiratory system           | 0.00 | 0.00 | 0.00 | 0.00  | 0.00  | 0.00  | 0.00  | 0.00  | 0.00  | 0.01  | 0.01  | 0.02  | 0.03  | 0.05  | 0.07  | 0.12  |
|         | Endocrine and metabolic diseases             | 0.00 | 0.00 | 0.00 | 0.00  | 0.00  | 0.00  | 0.00  | 0.00  | 0.00  | 0.00  | 0.00  | 0.00  | 0.01  | 0.01  | 0.02  | 0.03  |
|         | Infectious diseases                          | 0.00 | 0.00 | 0.00 | 0.00  | 0.00  | 0.00  | 0.00  | 0.00  | 0.00  | 0.01  | 0.01  | 0.00  | 0.01  | 0.01  | 0.01  | 0.01  |
|         | Injuries                                     | 0.00 | 0.01 | 0.00 | 0.02  | 0.08  | 0.13  | 0.10  | 0.08  | 0.08  | 0.08  | 0.07  | 0.07  | 0.06  | 0.05  | 0.04  | 0.03  |
|         | Nonavoidable deaths                          | 0.00 | 0.00 | 0.00 | 0.00  | 0.00  | 0.00  | 0.00  | 0.00  | 0.00  | 0.00  | 0.00  | 0.00  | 0.00  | 0.00  | 0.00  | 0.00  |
|         | Pregnancy, childbirth and perinatal period   | 0.13 | 0.00 | 0.00 | 0.00  | 0.00  | 0.00  | 0.00  | 0.00  | 0.00  | 0.00  | 0.00  | 0.00  | 0.00  | 0.00  | 0.00  | 0.00  |
| Italy   | Adverse effects of medical and surgical care | 0.00 | 0.00 | 0.00 | 0.00  | 0.00  | 0.00  | 0.00  | 0.00  | 0.00  | 0.00  | 0.00  | 0.00  | 0.00  | 0.00  | 0.00  | 0.00  |
|         | Alcohol- related and drug related deaths     | 0.00 | 0.00 | 0.00 | 0.00  | 0.00  | 0.00  | 0.01  | 0.01  | 0.01  | 0.02  | 0.02  | 0.03  | 0.03  | 0.03  | 0.03  | 0.03  |



| Country | Cause Group                                  | 0-1  | 1-4  | 5-9  | 10-14 | 15-19 | 20-24 | 25-29 | 30-34 | 35-39 | 40-44 | 45-49 | 50-54 | 55-59 | 60-64 | 65-69 | 70-74 |
|---------|----------------------------------------------|------|------|------|-------|-------|-------|-------|-------|-------|-------|-------|-------|-------|-------|-------|-------|
|         | Cancer                                       | 0.00 | 0.00 | 0.00 | 0.00  | 0.00  | 0.01  | 0.01  | 0.01  | 0.02  | 0.04  | 0.07  | 0.13  | 0.21  | 0.30  | 0.37  | 0.39  |
|         | Cardiovascular diseases                      | 0.00 | 0.00 | 0.00 | 0.00  | 0.00  | 0.00  | 0.00  | 0.01  | 0.01  | 0.03  | 0.05  | 0.07  | 0.11  | 0.14  | 0.17  | 0.21  |
|         | Cerebrovascular diseases                     | 0.00 | 0.00 | 0.00 | 0.00  | 0.00  | 0.00  | 0.00  | 0.00  | 0.00  | 0.01  | 0.01  | 0.02  | 0.02  | 0.04  | 0.05  | 0.08  |
|         | Congenital malformations                     | 0.04 | 0.00 | 0.00 | 0.00  | 0.00  | 0.00  | 0.00  | 0.00  | 0.00  | 0.00  | 0.00  | 0.00  | 0.00  | 0.00  | 0.00  | 0.00  |
|         | Diseases of the digestive system             | 0.00 | 0.00 | 0.00 | 0.00  | 0.00  | 0.00  | 0.00  | 0.00  | 0.00  | 0.00  | 0.00  | 0.00  | 0.00  | 0.01  | 0.01  | 0.01  |
|         | Diseases of the genitourinary system         | 0.00 | 0.00 | 0.00 | 0.00  | 0.00  | 0.00  | 0.00  | 0.00  | 0.00  | 0.00  | 0.00  | 0.00  | 0.00  | 0.01  | 0.01  | 0.01  |
|         | Diseases of the nervous system               | 0.00 | 0.00 | 0.00 | 0.00  | 0.00  | 0.00  | 0.00  | 0.00  | 0.00  | 0.00  | 0.00  | 0.00  | 0.00  | 0.00  | 0.00  | 0.00  |
|         | Diseases of the respiratory system           | 0.00 | 0.00 | 0.00 | 0.00  | 0.00  | 0.00  | 0.00  | 0.00  | 0.00  | 0.01  | 0.01  | 0.01  | 0.02  | 0.02  | 0.04  | 0.06  |
|         | Endocrine and metabolic diseases             | 0.00 | 0.00 | 0.00 | 0.00  | 0.00  | 0.00  | 0.00  | 0.00  | 0.00  | 0.00  | 0.01  | 0.01  | 0.02  | 0.03  | 0.04  | 0.05  |
|         | Infectious diseases                          | 0.00 | 0.00 | 0.00 | 0.00  | 0.00  | 0.00  | 0.00  | 0.00  | 0.01  | 0.01  | 0.02  | 0.02  | 0.02  | 0.01  | 0.02  | 0.02  |
|         | Injuries                                     | 0.00 | 0.01 | 0.01 | 0.01  | 0.07  | 0.10  | 0.09  | 0.08  | 0.06  | 0.06  | 0.06  | 0.05  | 0.04  | 0.04  | 0.03  | 0.03  |
|         | Nonavoidable deaths                          | 0.00 | 0.00 | 0.00 | 0.00  | 0.00  | 0.00  | 0.00  | 0.00  | 0.00  | 0.00  | 0.00  | 0.00  | 0.00  | 0.00  | 0.00  | 0.00  |
|         | Pregnancy, childbirth and perinatal period   | 0.16 | 0.00 | 0.00 | 0.00  | 0.00  | 0.00  | 0.00  | 0.00  | 0.00  | 0.00  | 0.00  | 0.00  | 0.00  | 0.00  | 0.00  | 0.00  |
| Latvia  | Adverse effects of medical and surgical care | 0.00 | 0.00 | 0.00 | 0.00  | 0.00  | 0.00  | 0.00  | 0.00  | 0.00  | 0.00  | 0.00  | 0.00  | 0.00  | 0.00  | 0.00  | 0.00  |
|         | Alcohol- related and drug related deaths     | 0.00 | 0.00 | 0.00 | 0.00  | 0.00  | 0.03  | 0.07  | 0.12  | 0.16  | 0.20  | 0.22  | 0.22  | 0.18  | 0.14  | 0.08  | 0.04  |
|         | Cancer                                       | 0.00 | 0.00 | 0.00 | 0.00  | 0.00  | 0.01  | 0.01  | 0.02  | 0.02  | 0.05  | 0.10  | 0.19  | 0.29  | 0.37  | 0.38  | 0.34  |
|         | Cardiovascular diseases                      | 0.00 | 0.00 | 0.00 | 0.00  | 0.00  | 0.00  | 0.01  | 0.03  | 0.05  | 0.12  | 0.21  | 0.35  | 0.49  | 0.62  | 0.66  | 0.62  |
|         | Cerebrovascular diseases                     | 0.00 | 0.00 | 0.00 | 0.00  | 0.00  | 0.00  | 0.01  | 0.01  | 0.02  | 0.03  | 0.06  | 0.09  | 0.14  | 0.20  | 0.25  | 0.27  |
|         | Congenital malformations                     | 0.04 | 0.00 | 0.00 | 0.00  | 0.00  | 0.00  | 0.00  | 0.00  | 0.00  | 0.00  | 0.00  | 0.00  | 0.00  | 0.00  | 0.00  | 0.00  |
|         | Diseases of the digestive system             | 0.00 | 0.00 | 0.00 | 0.00  | 0.00  | 0.00  | 0.01  | 0.01  | 0.01  | 0.02  | 0.02  | 0.03  | 0.02  | 0.02  | 0.02  | 0.02  |
|         | Diseases of the genitourinary system         | 0.00 | 0.00 | 0.00 | 0.00  | 0.00  | 0.00  | 0.00  | 0.00  | 0.00  | 0.00  | 0.00  | 0.00  | 0.01  | 0.01  | 0.01  | 0.01  |
|         | Diseases of the nervous system               | 0.00 | 0.00 | 0.00 | 0.00  | 0.00  | 0.00  | 0.01  | 0.01  | 0.01  | 0.01  | 0.01  | 0.01  | 0.01  | 0.00  | 0.00  | 0.00  |

| Country                                    | Cause Group                                  | 0-1  | 1-4  | 5-9  | 10-14 | 15-19 | 20-24 | 25-29 | 30-34 | 35-39 | 40-44 | 45-49 | 50-54 | 55-59 | 60-64 | 65-69 | 70-74 |
|--------------------------------------------|----------------------------------------------|------|------|------|-------|-------|-------|-------|-------|-------|-------|-------|-------|-------|-------|-------|-------|
| Lithuania                                  | Diseases of the respiratory system           | 0.01 | 0.00 | 0.00 | 0.00  | 0.01  | 0.01  | 0.01  | 0.02  | 0.03  | 0.04  | 0.05  | 0.06  | 0.07  | 0.08  | 0.07  | 0.07  |
|                                            | Endocrine and metabolic diseases             | 0.00 | 0.00 | 0.00 | 0.00  | 0.00  | 0.00  | 0.00  | 0.01  | 0.01  | 0.01  | 0.01  | 0.02  | 0.02  | 0.02  | 0.03  | 0.03  |
|                                            | Infectious diseases                          | 0.00 | 0.00 | 0.00 | 0.00  | 0.00  | 0.00  | 0.02  | 0.04  | 0.05  | 0.05  | 0.04  | 0.04  | 0.03  | 0.02  | 0.02  | 0.01  |
|                                            | Injuries                                     | 0.01 | 0.03 | 0.03 | 0.04  | 0.15  | 0.22  | 0.25  | 0.24  | 0.26  | 0.27  | 0.27  | 0.25  | 0.21  | 0.15  | 0.10  | 0.06  |
|                                            | Nonavoidable deaths                          | 0.00 | 0.00 | 0.00 | 0.00  | 0.00  | 0.00  | 0.00  | 0.00  | 0.00  | 0.00  | 0.00  | 0.00  | 0.00  | 0.00  | 0.00  | 0.00  |
|                                            | Pregnancy, childbirth and perinatal period   | 0.22 | 0.00 | 0.00 | 0.00  | 0.00  | 0.00  | 0.00  | 0.00  | 0.00  | 0.00  | 0.00  | 0.00  | 0.00  | 0.00  | 0.00  | 0.00  |
|                                            | Adverse effects of medical and surgical care | 0.00 | 0.00 | 0.00 | 0.00  | 0.00  | 0.00  | 0.00  | 0.00  | 0.00  | 0.00  | 0.00  | 0.00  | 0.00  | 0.00  | 0.00  | 0.00  |
|                                            | Alcohol- related and drug related deaths     | 0.00 | 0.00 | 0.00 | 0.00  | 0.01  | 0.03  | 0.07  | 0.12  | 0.16  | 0.19  | 0.20  | 0.19  | 0.15  | 0.12  | 0.07  | 0.03  |
|                                            | Cancer                                       | 0.00 | 0.00 | 0.00 | 0.00  | 0.00  | 0.01  | 0.01  | 0.02  | 0.03  | 0.05  | 0.10  | 0.18  | 0.29  | 0.38  | 0.38  | 0.32  |
|                                            | Cardiovascular diseases                      | 0.00 | 0.00 | 0.00 | 0.00  | 0.00  | 0.01  | 0.01  | 0.03  | 0.07  | 0.13  | 0.22  | 0.33  | 0.48  | 0.62  | 0.67  | 0.64  |
|                                            | Cerebrovascular diseases                     | 0.00 | 0.00 | 0.00 | 0.00  | 0.00  | 0.00  | 0.01  | 0.01  | 0.02  | 0.03  | 0.05  | 0.07  | 0.11  | 0.15  | 0.19  | 0.20  |
|                                            | Congenital malformations                     | 0.05 | 0.00 | 0.00 | 0.00  | 0.00  | 0.00  | 0.00  | 0.00  | 0.00  | 0.00  | 0.00  | 0.00  | 0.00  | 0.00  | 0.00  | 0.00  |
|                                            | Diseases of the digestive system             | 0.00 | 0.00 | 0.00 | 0.00  | 0.00  | 0.00  | 0.01  | 0.01  | 0.02  | 0.02  | 0.03  | 0.03  | 0.03  | 0.03  | 0.03  | 0.02  |
|                                            | Diseases of the genitourinary system         | 0.00 | 0.00 | 0.00 | 0.00  | 0.00  | 0.00  | 0.00  | 0.00  | 0.00  | 0.00  | 0.00  | 0.00  | 0.01  | 0.00  | 0.01  | 0.01  |
|                                            | Diseases of the nervous system               | 0.00 | 0.00 | 0.00 | 0.00  | 0.00  | 0.00  | 0.01  | 0.01  | 0.01  | 0.01  | 0.01  | 0.01  | 0.01  | 0.01  | 0.00  | 0.00  |
|                                            | Diseases of the respiratory system           | 0.01 | 0.00 | 0.00 | 0.00  | 0.00  | 0.01  | 0.01  | 0.02  | 0.03  | 0.04  | 0.05  | 0.06  | 0.07  | 0.09  | 0.09  | 0.09  |
|                                            | Endocrine and metabolic diseases             | 0.00 | 0.00 | 0.00 | 0.00  | 0.00  | 0.00  | 0.00  | 0.00  | 0.01  | 0.01  | 0.01  | 0.01  | 0.01  | 0.01  | 0.02  | 0.02  |
|                                            | Infectious diseases                          | 0.01 | 0.01 | 0.00 | 0.00  | 0.00  | 0.00  | 0.01  | 0.03  | 0.04  | 0.05  | 0.05  | 0.05  | 0.04  | 0.04  | 0.03  | 0.02  |
|                                            | Injuries                                     | 0.02 | 0.04 | 0.04 | 0.05  | 0.20  | 0.30  | 0.30  | 0.31  | 0.33  | 0.34  | 0.34  | 0.33  | 0.28  | 0.22  | 0.14  | 0.08  |
|                                            | Nonavoidable deaths                          | 0.00 | 0.00 | 0.00 | 0.00  | 0.00  | 0.00  | 0.00  | 0.00  | 0.00  | 0.00  | 0.00  | 0.00  | 0.00  | 0.00  | 0.00  | 0.00  |
| Pregnancy, childbirth and perinatal period | 0.15                                         | 0.00 | 0.00 | 0.00 | 0.00  | 0.00  | 0.00  | 0.00  | 0.00  | 0.00  | 0.00  | 0.00  | 0.00  | 0.00  | 0.00  | 0.00  |       |
| Luxembourg                                 | Adverse effects of medical and surgical care | 0.00 | 0.00 | 0.00 | 0.00  | 0.00  | 0.00  | 0.00  | 0.00  | 0.00  | 0.00  | 0.00  | 0.00  | 0.01  | 0.00  | 0.00  | 0.01  |

| Country | Cause Group                                  | 0-1  | 1-4  | 5-9  | 10-14 | 15-19 | 20-24 | 25-29 | 30-34 | 35-39 | 40-44 | 45-49 | 50-54 | 55-59 | 60-64 | 65-69 | 70-74 |
|---------|----------------------------------------------|------|------|------|-------|-------|-------|-------|-------|-------|-------|-------|-------|-------|-------|-------|-------|
|         | Alcohol- related and drug related deaths     | 0.00 | 0.00 | 0.00 | 0.00  | 0.01  | 0.02  | 0.02  | 0.02  | 0.04  | 0.04  | 0.06  | 0.08  | 0.07  | 0.08  | 0.06  | 0.04  |
|         | Cancer                                       | 0.00 | 0.00 | 0.00 | 0.00  | 0.00  | 0.00  | 0.01  | 0.01  | 0.01  | 0.03  | 0.07  | 0.13  | 0.19  | 0.27  | 0.32  | 0.36  |
|         | Cardiovascular diseases                      | 0.00 | 0.00 | 0.00 | 0.00  | 0.00  | 0.00  | 0.00  | 0.00  | 0.02  | 0.03  | 0.05  | 0.08  | 0.12  | 0.14  | 0.18  | 0.21  |
|         | Cerebrovascular diseases                     | 0.00 | 0.00 | 0.00 | 0.00  | 0.00  | 0.00  | 0.00  | 0.00  | 0.01  | 0.01  | 0.01  | 0.02  | 0.03  | 0.03  | 0.06  | 0.08  |
|         | Congenital malformations                     | 0.01 | 0.00 | 0.00 | 0.00  | 0.00  | 0.00  | 0.00  | 0.00  | 0.00  | 0.00  | 0.00  | 0.00  | 0.00  | 0.00  | 0.00  | 0.00  |
|         | Diseases of the digestive system             | 0.00 | 0.00 | 0.00 | 0.00  | 0.00  | 0.00  | 0.00  | 0.00  | 0.00  | 0.00  | 0.00  | 0.00  | 0.00  | 0.01  | 0.00  | 0.01  |
|         | Diseases of the genitourinary system         | 0.00 | 0.00 | 0.00 | 0.00  | 0.00  | 0.00  | 0.00  | 0.00  | 0.00  | 0.00  | 0.00  | 0.00  | 0.00  | 0.01  | 0.01  | 0.02  |
|         | Diseases of the nervous system               | 0.00 | 0.00 | 0.00 | 0.00  | 0.00  | 0.00  | 0.00  | 0.00  | 0.00  | 0.00  | 0.00  | 0.01  | 0.01  | 0.00  | 0.01  | 0.00  |
|         | Diseases of the respiratory system           | 0.00 | 0.00 | 0.00 | 0.00  | 0.00  | 0.00  | 0.00  | 0.00  | 0.00  | 0.00  | 0.01  | 0.02  | 0.03  | 0.05  | 0.08  | 0.11  |
|         | Endocrine and metabolic diseases             | 0.00 | 0.00 | 0.00 | 0.00  | 0.00  | 0.00  | 0.00  | 0.00  | 0.00  | 0.00  | 0.00  | 0.01  | 0.01  | 0.02  | 0.02  | 0.02  |
|         | Infectious diseases                          | 0.00 | 0.00 | 0.00 | 0.00  | 0.00  | 0.00  | 0.00  | 0.01  | 0.00  | 0.00  | 0.01  | 0.01  | 0.02  | 0.01  | 0.02  | 0.02  |
|         | Injuries                                     | 0.01 | 0.03 | 0.01 | 0.01  | 0.06  | 0.10  | 0.07  | 0.08  | 0.08  | 0.07  | 0.06  | 0.07  | 0.05  | 0.05  | 0.05  | 0.05  |
|         | Nonavoidable deaths                          | 0.00 | 0.00 | 0.00 | 0.00  | 0.00  | 0.00  | 0.00  | 0.00  | 0.00  | 0.00  | 0.00  | 0.00  | 0.00  | 0.00  | 0.00  | 0.00  |
|         | Pregnancy, childbirth and perinatal period   | 0.13 | 0.00 | 0.00 | 0.00  | 0.00  | 0.00  | 0.00  | 0.00  | 0.00  | 0.00  | 0.00  | 0.00  | 0.00  | 0.00  | 0.00  | 0.00  |
| Malta   | Adverse effects of medical and surgical care | 0.00 | 0.00 | 0.00 | 0.00  | 0.00  | 0.00  | 0.00  | 0.00  | 0.00  | 0.00  | 0.00  | 0.00  | 0.00  | 0.00  | 0.00  | 0.00  |
|         | Alcohol- related and drug related deaths     | 0.00 | 0.00 | 0.00 | 0.00  | 0.00  | 0.01  | 0.02  | 0.03  | 0.02  | 0.02  | 0.03  | 0.02  | 0.02  | 0.02  | 0.02  | 0.03  |
|         | Cancer                                       | 0.00 | 0.00 | 0.00 | 0.00  | 0.00  | 0.01  | 0.01  | 0.01  | 0.02  | 0.03  | 0.05  | 0.11  | 0.18  | 0.26  | 0.31  | 0.35  |
|         | Cardiovascular diseases                      | 0.00 | 0.00 | 0.00 | 0.00  | 0.00  | 0.00  | 0.01  | 0.02  | 0.02  | 0.04  | 0.08  | 0.12  | 0.18  | 0.23  | 0.32  | 0.37  |
|         | Cerebrovascular diseases                     | 0.01 | 0.00 | 0.00 | 0.00  | 0.00  | 0.01  | 0.00  | 0.00  | 0.01  | 0.01  | 0.01  | 0.02  | 0.03  | 0.04  | 0.06  | 0.09  |
|         | Congenital malformations                     | 0.07 | 0.00 | 0.00 | 0.00  | 0.00  | 0.00  | 0.00  | 0.00  | 0.00  | 0.00  | 0.00  | 0.00  | 0.00  | 0.00  | 0.00  | 0.00  |
|         | Diseases of the digestive system             | 0.00 | 0.00 | 0.00 | 0.00  | 0.00  | 0.00  | 0.00  | 0.00  | 0.00  | 0.00  | 0.00  | 0.00  | 0.00  | 0.01  | 0.01  | 0.01  |
|         | Diseases of the genitourinary system         | 0.00 | 0.00 | 0.00 | 0.00  | 0.00  | 0.00  | 0.00  | 0.00  | 0.00  | 0.00  | 0.00  | 0.00  | 0.00  | 0.01  | 0.01  | 0.02  |

| Country     | Cause Group                                  | 0-1  | 1-4  | 5-9  | 10-14 | 15-19 | 20-24 | 25-29 | 30-34 | 35-39 | 40-44 | 45-49 | 50-54 | 55-59 | 60-64 | 65-69 | 70-74 |
|-------------|----------------------------------------------|------|------|------|-------|-------|-------|-------|-------|-------|-------|-------|-------|-------|-------|-------|-------|
|             | Diseases of the nervous system               | 0.00 | 0.00 | 0.00 | 0.00  | 0.00  | 0.00  | 0.00  | 0.00  | 0.00  | 0.00  | 0.00  | 0.00  | 0.00  | 0.00  | 0.00  | 0.00  |
|             | Diseases of the respiratory system           | 0.01 | 0.01 | 0.00 | 0.00  | 0.01  | 0.00  | 0.00  | 0.01  | 0.01  | 0.01  | 0.01  | 0.02  | 0.02  | 0.04  | 0.07  | 0.11  |
|             | Endocrine and metabolic diseases             | 0.00 | 0.00 | 0.00 | 0.00  | 0.00  | 0.00  | 0.00  | 0.00  | 0.00  | 0.01  | 0.01  | 0.02  | 0.03  | 0.04  | 0.05  | 0.05  |
|             | Infectious diseases                          | 0.00 | 0.01 | 0.00 | 0.00  | 0.00  | 0.00  | 0.00  | 0.00  | 0.01  | 0.00  | 0.01  | 0.01  | 0.00  | 0.01  | 0.01  | 0.00  |
|             | Injuries                                     | 0.00 | 0.01 | 0.00 | 0.02  | 0.06  | 0.07  | 0.08  | 0.08  | 0.07  | 0.08  | 0.05  | 0.05  | 0.04  | 0.03  | 0.02  | 0.03  |
|             | Nonavoidable deaths                          | 0.00 | 0.00 | 0.00 | 0.00  | 0.00  | 0.00  | 0.00  | 0.00  | 0.00  | 0.00  | 0.00  | 0.00  | 0.00  | 0.00  | 0.00  | 0.00  |
|             | Pregnancy, childbirth and perinatal period   | 0.25 | 0.00 | 0.00 | 0.00  | 0.00  | 0.00  | 0.00  | 0.00  | 0.00  | 0.00  | 0.00  | 0.00  | 0.00  | 0.00  | 0.00  | 0.00  |
| Netherlands | Adverse effects of medical and surgical care | 0.00 | 0.00 | 0.00 | 0.00  | 0.00  | 0.00  | 0.00  | 0.00  | 0.00  | 0.00  | 0.00  | 0.00  | 0.00  | 0.00  | 0.00  | 0.00  |
|             | Alcohol- related and drug related deaths     | 0.00 | 0.00 | 0.00 | 0.00  | 0.00  | 0.01  | 0.01  | 0.01  | 0.02  | 0.02  | 0.03  | 0.03  | 0.03  | 0.03  | 0.02  | 0.02  |
|             | Cancer                                       | 0.00 | 0.00 | 0.00 | 0.00  | 0.00  | 0.00  | 0.01  | 0.01  | 0.02  | 0.04  | 0.07  | 0.13  | 0.21  | 0.29  | 0.36  | 0.38  |
|             | Cardiovascular diseases                      | 0.00 | 0.00 | 0.00 | 0.00  | 0.00  | 0.00  | 0.00  | 0.01  | 0.01  | 0.02  | 0.04  | 0.06  | 0.08  | 0.11  | 0.14  | 0.17  |
|             | Cerebrovascular diseases                     | 0.00 | 0.00 | 0.00 | 0.00  | 0.00  | 0.00  | 0.00  | 0.00  | 0.00  | 0.01  | 0.01  | 0.02  | 0.02  | 0.03  | 0.05  | 0.07  |
|             | Congenital malformations                     | 0.03 | 0.00 | 0.00 | 0.00  | 0.00  | 0.00  | 0.00  | 0.00  | 0.00  | 0.00  | 0.00  | 0.00  | 0.00  | 0.00  | 0.00  | 0.00  |
|             | Diseases of the digestive system             | 0.00 | 0.00 | 0.00 | 0.00  | 0.00  | 0.00  | 0.00  | 0.00  | 0.00  | 0.00  | 0.00  | 0.00  | 0.00  | 0.01  | 0.01  | 0.01  |
|             | Diseases of the genitourinary system         | 0.00 | 0.00 | 0.00 | 0.00  | 0.00  | 0.00  | 0.00  | 0.00  | 0.00  | 0.00  | 0.00  | 0.00  | 0.00  | 0.00  | 0.01  | 0.01  |
|             | Diseases of the nervous system               | 0.00 | 0.00 | 0.00 | 0.00  | 0.00  | 0.00  | 0.00  | 0.00  | 0.00  | 0.00  | 0.00  | 0.00  | 0.00  | 0.00  | 0.00  | 0.00  |
|             | Diseases of the respiratory system           | 0.00 | 0.00 | 0.00 | 0.00  | 0.00  | 0.00  | 0.00  | 0.00  | 0.00  | 0.00  | 0.01  | 0.01  | 0.03  | 0.04  | 0.07  | 0.11  |
|             | Endocrine and metabolic diseases             | 0.00 | 0.00 | 0.00 | 0.00  | 0.00  | 0.00  | 0.00  | 0.00  | 0.00  | 0.00  | 0.01  | 0.01  | 0.02  | 0.02  | 0.03  | 0.03  |
|             | Infectious diseases                          | 0.00 | 0.00 | 0.00 | 0.00  | 0.00  | 0.00  | 0.00  | 0.00  | 0.00  | 0.00  | 0.01  | 0.01  | 0.01  | 0.01  | 0.01  | 0.02  |
|             | Injuries                                     | 0.01 | 0.01 | 0.01 | 0.01  | 0.05  | 0.07  | 0.06  | 0.05  | 0.05  | 0.05  | 0.05  | 0.05  | 0.04  | 0.03  | 0.03  | 0.03  |
|             | Nonavoidable deaths                          | 0.00 | 0.00 | 0.00 | 0.00  | 0.00  | 0.00  | 0.00  | 0.00  | 0.00  | 0.00  | 0.00  | 0.00  | 0.00  | 0.00  | 0.00  | 0.00  |
|             | Pregnancy, childbirth and perinatal period   | 0.19 | 0.00 | 0.00 | 0.00  | 0.00  | 0.00  | 0.00  | 0.00  | 0.00  | 0.00  | 0.00  | 0.00  | 0.00  | 0.00  | 0.00  | 0.00  |

| Country                                    | Cause Group                                  | 0-1  | 1-4  | 5-9  | 10-14 | 15-19 | 20-24 | 25-29 | 30-34 | 35-39 | 40-44 | 45-49 | 50-54 | 55-59 | 60-64 | 65-69 | 70-74 |
|--------------------------------------------|----------------------------------------------|------|------|------|-------|-------|-------|-------|-------|-------|-------|-------|-------|-------|-------|-------|-------|
| Poland                                     | Adverse effects of medical and surgical care | 0.00 | 0.00 | 0.00 | 0.00  | 0.00  | 0.00  | 0.00  | 0.00  | 0.00  | 0.00  | 0.00  | 0.00  | 0.00  | 0.00  | 0.00  | 0.00  |
|                                            | Alcohol- related and drug related deaths     | 0.00 | 0.00 | 0.00 | 0.00  | 0.00  | 0.01  | 0.02  | 0.04  | 0.07  | 0.09  | 0.12  | 0.13  | 0.11  | 0.09  | 0.06  | 0.03  |
|                                            | Cancer                                       | 0.00 | 0.00 | 0.00 | 0.00  | 0.00  | 0.01  | 0.01  | 0.01  | 0.02  | 0.04  | 0.10  | 0.19  | 0.30  | 0.40  | 0.44  | 0.40  |
|                                            | Cardiovascular diseases                      | 0.00 | 0.00 | 0.00 | 0.00  | 0.00  | 0.00  | 0.00  | 0.01  | 0.02  | 0.05  | 0.10  | 0.16  | 0.22  | 0.28  | 0.33  | 0.35  |
|                                            | Cerebrovascular diseases                     | 0.00 | 0.00 | 0.00 | 0.00  | 0.00  | 0.00  | 0.00  | 0.01  | 0.01  | 0.02  | 0.04  | 0.06  | 0.08  | 0.10  | 0.13  | 0.14  |
|                                            | Congenital malformations                     | 0.06 | 0.01 | 0.00 | 0.00  | 0.00  | 0.00  | 0.00  | 0.00  | 0.00  | 0.00  | 0.00  | 0.00  | 0.00  | 0.00  | 0.00  | 0.00  |
|                                            | Diseases of the digestive system             | 0.00 | 0.00 | 0.00 | 0.00  | 0.00  | 0.00  | 0.01  | 0.01  | 0.01  | 0.01  | 0.02  | 0.02  | 0.02  | 0.02  | 0.02  | 0.02  |
|                                            | Diseases of the genitourinary system         | 0.00 | 0.00 | 0.00 | 0.00  | 0.00  | 0.00  | 0.00  | 0.00  | 0.00  | 0.00  | 0.00  | 0.01  | 0.01  | 0.01  | 0.01  | 0.01  |
|                                            | Diseases of the nervous system               | 0.00 | 0.00 | 0.00 | 0.00  | 0.00  | 0.00  | 0.00  | 0.00  | 0.01  | 0.01  | 0.01  | 0.01  | 0.01  | 0.01  | 0.00  | 0.00  |
|                                            | Diseases of the respiratory system           | 0.01 | 0.01 | 0.00 | 0.00  | 0.01  | 0.01  | 0.01  | 0.01  | 0.01  | 0.02  | 0.03  | 0.04  | 0.05  | 0.07  | 0.09  | 0.11  |
|                                            | Endocrine and metabolic diseases             | 0.00 | 0.00 | 0.00 | 0.00  | 0.00  | 0.00  | 0.00  | 0.00  | 0.00  | 0.01  | 0.01  | 0.02  | 0.02  | 0.03  | 0.03  | 0.03  |
|                                            | Infectious diseases                          | 0.01 | 0.00 | 0.00 | 0.00  | 0.00  | 0.00  | 0.00  | 0.01  | 0.01  | 0.01  | 0.01  | 0.01  | 0.01  | 0.01  | 0.01  | 0.01  |
|                                            | Injuries                                     | 0.01 | 0.01 | 0.01 | 0.02  | 0.13  | 0.19  | 0.15  | 0.14  | 0.14  | 0.15  | 0.15  | 0.15  | 0.12  | 0.09  | 0.06  | 0.05  |
|                                            | Nonavoidable deaths                          | 0.00 | 0.00 | 0.00 | 0.00  | 0.00  | 0.00  | 0.00  | 0.00  | 0.00  | 0.00  | 0.00  | 0.00  | 0.00  | 0.00  | 0.00  | 0.00  |
| Pregnancy, childbirth and perinatal period | 0.22                                         | 0.00 | 0.00 | 0.00 | 0.00  | 0.00  | 0.00  | 0.00  | 0.00  | 0.00  | 0.00  | 0.00  | 0.00  | 0.00  | 0.00  | 0.00  |       |
| Portugal                                   | Adverse effects of medical and surgical care | 0.00 | 0.00 | 0.00 | 0.00  | 0.00  | 0.00  | 0.00  | 0.00  | 0.00  | 0.00  | 0.00  | 0.00  | 0.00  | 0.00  | 0.00  | 0.00  |
|                                            | Alcohol- related and drug related deaths     | 0.00 | 0.00 | 0.00 | 0.00  | 0.00  | 0.00  | 0.01  | 0.01  | 0.02  | 0.04  | 0.05  | 0.06  | 0.05  | 0.05  | 0.04  | 0.03  |
|                                            | Cancer                                       | 0.00 | 0.00 | 0.00 | 0.00  | 0.00  | 0.01  | 0.01  | 0.02  | 0.03  | 0.07  | 0.13  | 0.22  | 0.29  | 0.33  | 0.34  | 0.32  |
|                                            | Cardiovascular diseases                      | 0.00 | 0.00 | 0.00 | 0.00  | 0.00  | 0.00  | 0.01  | 0.01  | 0.02  | 0.03  | 0.05  | 0.08  | 0.10  | 0.12  | 0.13  | 0.16  |
|                                            | Cerebrovascular diseases                     | 0.00 | 0.00 | 0.00 | 0.00  | 0.00  | 0.00  | 0.00  | 0.00  | 0.01  | 0.02  | 0.02  | 0.04  | 0.05  | 0.07  | 0.09  | 0.14  |
|                                            | Congenital malformations                     | 0.03 | 0.00 | 0.00 | 0.00  | 0.00  | 0.00  | 0.00  | 0.00  | 0.00  | 0.00  | 0.00  | 0.00  | 0.00  | 0.00  | 0.00  | 0.00  |
|                                            | Diseases of the digestive system             | 0.00 | 0.00 | 0.00 | 0.00  | 0.00  | 0.00  | 0.00  | 0.00  | 0.00  | 0.00  | 0.01  | 0.01  | 0.01  | 0.01  | 0.01  | 0.01  |

| Country | Cause Group                                  | 0-1  | 1-4  | 5-9  | 10-14 | 15-19 | 20-24 | 25-29 | 30-34 | 35-39 | 40-44 | 45-49 | 50-54 | 55-59 | 60-64 | 65-69 | 70-74 |
|---------|----------------------------------------------|------|------|------|-------|-------|-------|-------|-------|-------|-------|-------|-------|-------|-------|-------|-------|
|         | Diseases of the genitourinary system         | 0·00 | 0·00 | 0·00 | 0·00  | 0·00  | 0·00  | 0·00  | 0·00  | 0·00  | 0·00  | 0·00  | 0·00  | 0·00  | 0·01  | 0·01  | 0·01  |
|         | Diseases of the nervous system               | 0·00 | 0·00 | 0·00 | 0·00  | 0·00  | 0·00  | 0·00  | 0·00  | 0·00  | 0·00  | 0·00  | 0·00  | 0·00  | 0·00  | 0·00  | 0·00  |
|         | Diseases of the respiratory system           | 0·00 | 0·00 | 0·00 | 0·00  | 0·00  | 0·00  | 0·00  | 0·01  | 0·01  | 0·01  | 0·02  | 0·03  | 0·04  | 0·05  | 0·07  | 0·10  |
|         | Endocrine and metabolic diseases             | 0·00 | 0·00 | 0·00 | 0·00  | 0·00  | 0·00  | 0·00  | 0·00  | 0·00  | 0·00  | 0·01  | 0·01  | 0·02  | 0·03  | 0·04  | 0·06  |
|         | Infectious diseases                          | 0·00 | 0·00 | 0·00 | 0·00  | 0·00  | 0·00  | 0·01  | 0·02  | 0·04  | 0·04  | 0·04  | 0·04  | 0·03  | 0·02  | 0·02  | 0·02  |
|         | Injuries                                     | 0·00 | 0·02 | 0·01 | 0·01  | 0·06  | 0·09  | 0·09  | 0·08  | 0·08  | 0·08  | 0·08  | 0·09  | 0·07  | 0·06  | 0·05  | 0·05  |
|         | Nonavoidable deaths                          | 0·00 | 0·00 | 0·00 | 0·00  | 0·00  | 0·00  | 0·00  | 0·00  | 0·00  | 0·00  | 0·00  | 0·00  | 0·00  | 0·00  | 0·00  | 0·00  |
|         | Pregnancy, childbirth and perinatal period   | 0·16 | 0·00 | 0·00 | 0·00  | 0·00  | 0·00  | 0·00  | 0·00  | 0·00  | 0·00  | 0·00  | 0·00  | 0·00  | 0·00  | 0·00  | 0·00  |
| Romania | Adverse effects of medical and surgical care | 0·00 | 0·00 | 0·00 | 0·00  | 0·00  | 0·00  | 0·00  | 0·00  | 0·00  | 0·00  | 0·00  | 0·00  | 0·00  | 0·00  | 0·00  | 0·00  |
|         | Alcohol- related and drug related deaths     | 0·00 | 0·00 | 0·00 | 0·00  | 0·00  | 0·01  | 0·01  | 0·02  | 0·04  | 0·08  | 0·12  | 0·15  | 0·16  | 0·14  | 0·11  | 0·07  |
|         | Cancer                                       | 0·00 | 0·00 | 0·00 | 0·00  | 0·01  | 0·01  | 0·01  | 0·02  | 0·03  | 0·07  | 0·15  | 0·26  | 0·37  | 0·40  | 0·38  | 0·30  |
|         | Cardiovascular diseases                      | 0·00 | 0·00 | 0·00 | 0·00  | 0·00  | 0·01  | 0·01  | 0·02  | 0·05  | 0·10  | 0·17  | 0·27  | 0·37  | 0·45  | 0·51  | 0·56  |
|         | Cerebrovascular diseases                     | 0·00 | 0·00 | 0·00 | 0·00  | 0·00  | 0·00  | 0·00  | 0·01  | 0·02  | 0·03  | 0·06  | 0·10  | 0·15  | 0·21  | 0·27  | 0·32  |
|         | Congenital malformations                     | 0·10 | 0·01 | 0·00 | 0·00  | 0·00  | 0·00  | 0·00  | 0·00  | 0·00  | 0·00  | 0·00  | 0·00  | 0·00  | 0·00  | 0·00  | 0·00  |
|         | Diseases of the digestive system             | 0·00 | 0·00 | 0·00 | 0·00  | 0·00  | 0·00  | 0·00  | 0·01  | 0·01  | 0·01  | 0·02  | 0·02  | 0·02  | 0·02  | 0·01  | 0·01  |
|         | Diseases of the genitourinary system         | 0·00 | 0·00 | 0·00 | 0·00  | 0·00  | 0·00  | 0·00  | 0·00  | 0·00  | 0·00  | 0·01  | 0·01  | 0·01  | 0·02  | 0·02  | 0·02  |
|         | Diseases of the nervous system               | 0·00 | 0·00 | 0·00 | 0·00  | 0·00  | 0·00  | 0·00  | 0·00  | 0·00  | 0·00  | 0·00  | 0·00  | 0·00  | 0·00  | 0·00  | 0·00  |
|         | Diseases of the respiratory system           | 0·20 | 0·03 | 0·01 | 0·01  | 0·01  | 0·01  | 0·01  | 0·02  | 0·03  | 0·04  | 0·06  | 0·07  | 0·09  | 0·10  | 0·11  | 0·11  |
|         | Endocrine and metabolic diseases             | 0·00 | 0·00 | 0·00 | 0·00  | 0·00  | 0·00  | 0·00  | 0·00  | 0·00  | 0·00  | 0·01  | 0·01  | 0·01  | 0·02  | 0·02  | 0·02  |
|         | Infectious diseases                          | 0·02 | 0·01 | 0·00 | 0·00  | 0·01  | 0·01  | 0·01  | 0·02  | 0·02  | 0·03  | 0·04  | 0·04  | 0·03  | 0·03  | 0·02  | 0·02  |
|         | Injuries                                     | 0·03 | 0·04 | 0·04 | 0·05  | 0·11  | 0·14  | 0·12  | 0·12  | 0·13  | 0·15  | 0·16  | 0·15  | 0·13  | 0·10  | 0·07  | 0·05  |
|         | Nonavoidable deaths                          | 0·00 | 0·00 | 0·00 | 0·00  | 0·00  | 0·00  | 0·00  | 0·00  | 0·00  | 0·00  | 0·00  | 0·00  | 0·00  | 0·00  | 0·00  | 0·00  |

| Country             | Cause Group                                  | 0-1  | 1-4  | 5-9  | 10-14 | 15-19 | 20-24 | 25-29 | 30-34 | 35-39 | 40-44 | 45-49 | 50-54 | 55-59 | 60-64 | 65-69 | 70-74 |
|---------------------|----------------------------------------------|------|------|------|-------|-------|-------|-------|-------|-------|-------|-------|-------|-------|-------|-------|-------|
| Slovakia            | Pregnancy, childbirth and perinatal period   | 0.30 | 0.00 | 0.00 | 0.00  | 0.00  | 0.00  | 0.00  | 0.00  | 0.00  | 0.00  | 0.00  | 0.00  | 0.00  | 0.00  | 0.00  | 0.00  |
|                     | Adverse effects of medical and surgical care | 0.00 | 0.00 | 0.00 | 0.00  | 0.00  | 0.00  | 0.00  | 0.00  | 0.00  | 0.00  | 0.00  | 0.00  | 0.00  | 0.00  | 0.00  | 0.00  |
|                     | Alcohol- related and drug related deaths     | 0.00 | 0.00 | 0.00 | 0.00  | 0.00  | 0.01  | 0.02  | 0.03  | 0.06  | 0.09  | 0.12  | 0.15  | 0.14  | 0.14  | 0.09  | 0.05  |
|                     | Cancer                                       | 0.00 | 0.00 | 0.00 | 0.00  | 0.00  | 0.01  | 0.01  | 0.01  | 0.02  | 0.04  | 0.11  | 0.21  | 0.31  | 0.39  | 0.42  | 0.37  |
|                     | Cardiovascular diseases                      | 0.00 | 0.00 | 0.00 | 0.00  | 0.00  | 0.00  | 0.01  | 0.01  | 0.03  | 0.07  | 0.14  | 0.22  | 0.33  | 0.45  | 0.52  | 0.57  |
|                     | Cerebrovascular diseases                     | 0.00 | 0.00 | 0.00 | 0.00  | 0.00  | 0.00  | 0.00  | 0.00  | 0.01  | 0.02  | 0.03  | 0.06  | 0.08  | 0.12  | 0.16  | 0.18  |
|                     | Congenital malformations                     | 0.06 | 0.01 | 0.00 | 0.00  | 0.00  | 0.00  | 0.00  | 0.00  | 0.00  | 0.00  | 0.00  | 0.00  | 0.00  | 0.00  | 0.00  | 0.00  |
|                     | Diseases of the digestive system             | 0.00 | 0.00 | 0.00 | 0.00  | 0.00  | 0.00  | 0.00  | 0.00  | 0.01  | 0.01  | 0.01  | 0.02  | 0.02  | 0.02  | 0.02  | 0.02  |
|                     | Diseases of the genitourinary system         | 0.00 | 0.00 | 0.00 | 0.00  | 0.00  | 0.00  | 0.00  | 0.00  | 0.00  | 0.00  | 0.00  | 0.01  | 0.01  | 0.01  | 0.02  | 0.02  |
|                     | Diseases of the nervous system               | 0.00 | 0.00 | 0.00 | 0.00  | 0.00  | 0.00  | 0.00  | 0.00  | 0.01  | 0.01  | 0.01  | 0.01  | 0.01  | 0.01  | 0.01  | 0.00  |
|                     | Diseases of the respiratory system           | 0.03 | 0.01 | 0.00 | 0.00  | 0.01  | 0.01  | 0.01  | 0.01  | 0.01  | 0.02  | 0.03  | 0.04  | 0.06  | 0.08  | 0.09  | 0.11  |
|                     | Endocrine and metabolic diseases             | 0.00 | 0.00 | 0.00 | 0.00  | 0.00  | 0.00  | 0.00  | 0.00  | 0.00  | 0.01  | 0.01  | 0.01  | 0.02  | 0.02  | 0.03  | 0.03  |
|                     | Infectious diseases                          | 0.01 | 0.00 | 0.00 | 0.00  | 0.00  | 0.00  | 0.00  | 0.00  | 0.00  | 0.00  | 0.01  | 0.01  | 0.01  | 0.01  | 0.01  | 0.01  |
|                     | Injuries                                     | 0.01 | 0.02 | 0.02 | 0.02  | 0.09  | 0.14  | 0.11  | 0.11  | 0.12  | 0.14  | 0.15  | 0.16  | 0.14  | 0.11  | 0.08  | 0.06  |
| Nonavoidable deaths | 0.00                                         | 0.00 | 0.00 | 0.00 | 0.00  | 0.00  | 0.00  | 0.00  | 0.00  | 0.00  | 0.00  | 0.00  | 0.00  | 0.00  | 0.00  | 0.00  |       |
| Slovenia            | Pregnancy, childbirth and perinatal period   | 0.21 | 0.00 | 0.00 | 0.00  | 0.00  | 0.00  | 0.00  | 0.00  | 0.00  | 0.00  | 0.00  | 0.00  | 0.00  | 0.00  | 0.00  | 0.00  |
|                     | Adverse effects of medical and surgical care | 0.00 | 0.00 | 0.00 | 0.00  | 0.00  | 0.00  | 0.00  | 0.00  | 0.00  | 0.00  | 0.00  | 0.01  | 0.01  | 0.01  | 0.01  | 0.01  |
|                     | Alcohol- related and drug related deaths     | 0.00 | 0.00 | 0.00 | 0.00  | 0.01  | 0.02  | 0.03  | 0.03  | 0.05  | 0.07  | 0.11  | 0.15  | 0.16  | 0.17  | 0.15  | 0.12  |
|                     | Cancer                                       | 0.00 | 0.00 | 0.00 | 0.00  | 0.00  | 0.01  | 0.01  | 0.01  | 0.02  | 0.04  | 0.09  | 0.18  | 0.30  | 0.38  | 0.42  | 0.41  |
|                     | Cardiovascular diseases                      | 0.00 | 0.00 | 0.00 | 0.00  | 0.00  | 0.00  | 0.00  | 0.01  | 0.02  | 0.03  | 0.07  | 0.11  | 0.15  | 0.20  | 0.22  | 0.26  |
|                     | Cerebrovascular diseases                     | 0.00 | 0.00 | 0.00 | 0.00  | 0.00  | 0.00  | 0.00  | 0.00  | 0.01  | 0.01  | 0.02  | 0.03  | 0.04  | 0.06  | 0.10  | 0.13  |
|                     | Congenital malformations                     | 0.02 | 0.00 | 0.00 | 0.00  | 0.00  | 0.00  | 0.00  | 0.00  | 0.00  | 0.00  | 0.00  | 0.00  | 0.00  | 0.00  | 0.00  | 0.00  |

| Country | Cause Group                                  | 0-1  | 1-4  | 5-9  | 10-14 | 15-19 | 20-24 | 25-29 | 30-34 | 35-39 | 40-44 | 45-49 | 50-54 | 55-59 | 60-64 | 65-69 | 70-74 |
|---------|----------------------------------------------|------|------|------|-------|-------|-------|-------|-------|-------|-------|-------|-------|-------|-------|-------|-------|
|         | Diseases of the digestive system             | 0.00 | 0.00 | 0.00 | 0.00  | 0.00  | 0.00  | 0.00  | 0.00  | 0.00  | 0.00  | 0.01  | 0.01  | 0.01  | 0.01  | 0.01  | 0.01  |
|         | Diseases of the genitourinary system         | 0.00 | 0.00 | 0.00 | 0.00  | 0.00  | 0.00  | 0.00  | 0.00  | 0.00  | 0.00  | 0.00  | 0.00  | 0.00  | 0.00  | 0.01  | 0.01  |
|         | Diseases of the nervous system               | 0.00 | 0.00 | 0.00 | 0.00  | 0.00  | 0.00  | 0.00  | 0.00  | 0.00  | 0.00  | 0.00  | 0.00  | 0.00  | 0.00  | 0.00  | 0.00  |
|         | Diseases of the respiratory system           | 0.00 | 0.00 | 0.00 | 0.00  | 0.00  | 0.00  | 0.00  | 0.00  | 0.00  | 0.00  | 0.01  | 0.01  | 0.02  | 0.03  | 0.05  | 0.08  |
|         | Endocrine and metabolic diseases             | 0.00 | 0.00 | 0.00 | 0.00  | 0.00  | 0.00  | 0.00  | 0.00  | 0.00  | 0.00  | 0.00  | 0.01  | 0.01  | 0.02  | 0.02  | 0.03  |
|         | Infectious diseases                          | 0.00 | 0.00 | 0.00 | 0.00  | 0.00  | 0.00  | 0.00  | 0.00  | 0.00  | 0.00  | 0.00  | 0.00  | 0.00  | 0.00  | 0.01  | 0.01  |
|         | Injuries                                     | 0.00 | 0.01 | 0.01 | 0.02  | 0.10  | 0.15  | 0.13  | 0.11  | 0.10  | 0.12  | 0.12  | 0.12  | 0.11  | 0.10  | 0.08  | 0.08  |
|         | Nonavoidable deaths                          | 0.00 | 0.00 | 0.00 | 0.00  | 0.00  | 0.00  | 0.00  | 0.00  | 0.00  | 0.00  | 0.00  | 0.00  | 0.00  | 0.00  | 0.00  | 0.00  |
|         | Pregnancy, childbirth and perinatal period   | 0.12 | 0.00 | 0.00 | 0.00  | 0.00  | 0.00  | 0.00  | 0.00  | 0.00  | 0.00  | 0.00  | 0.00  | 0.00  | 0.00  | 0.00  | 0.00  |
| Spain   | Adverse effects of medical and surgical care | 0.00 | 0.00 | 0.00 | 0.00  | 0.00  | 0.00  | 0.00  | 0.00  | 0.00  | 0.00  | 0.00  | 0.00  | 0.00  | 0.00  | 0.00  | 0.00  |
|         | Alcohol- related and drug related deaths     | 0.00 | 0.00 | 0.00 | 0.00  | 0.00  | 0.00  | 0.01  | 0.01  | 0.02  | 0.03  | 0.04  | 0.04  | 0.05  | 0.04  | 0.04  | 0.03  |
|         | Cancer                                       | 0.00 | 0.00 | 0.00 | 0.00  | 0.00  | 0.00  | 0.01  | 0.01  | 0.02  | 0.04  | 0.10  | 0.19  | 0.29  | 0.37  | 0.40  | 0.40  |
|         | Cardiovascular diseases                      | 0.00 | 0.00 | 0.00 | 0.00  | 0.00  | 0.00  | 0.00  | 0.01  | 0.01  | 0.03  | 0.05  | 0.08  | 0.11  | 0.14  | 0.16  | 0.19  |
|         | Cerebrovascular diseases                     | 0.00 | 0.00 | 0.00 | 0.00  | 0.00  | 0.00  | 0.00  | 0.00  | 0.00  | 0.01  | 0.02  | 0.02  | 0.03  | 0.04  | 0.05  | 0.08  |
|         | Congenital malformations                     | 0.03 | 0.00 | 0.00 | 0.00  | 0.00  | 0.00  | 0.00  | 0.00  | 0.00  | 0.00  | 0.00  | 0.00  | 0.00  | 0.00  | 0.00  | 0.00  |
|         | Diseases of the digestive system             | 0.00 | 0.00 | 0.00 | 0.00  | 0.00  | 0.00  | 0.00  | 0.00  | 0.00  | 0.00  | 0.00  | 0.00  | 0.01  | 0.01  | 0.01  | 0.01  |
|         | Diseases of the genitourinary system         | 0.00 | 0.00 | 0.00 | 0.00  | 0.00  | 0.00  | 0.00  | 0.00  | 0.00  | 0.00  | 0.00  | 0.00  | 0.00  | 0.01  | 0.01  | 0.02  |
|         | Diseases of the nervous system               | 0.00 | 0.00 | 0.00 | 0.00  | 0.00  | 0.00  | 0.00  | 0.00  | 0.00  | 0.00  | 0.00  | 0.00  | 0.00  | 0.00  | 0.00  | 0.00  |
|         | Diseases of the respiratory system           | 0.00 | 0.00 | 0.00 | 0.00  | 0.00  | 0.00  | 0.00  | 0.01  | 0.01  | 0.01  | 0.02  | 0.02  | 0.03  | 0.05  | 0.07  | 0.11  |
|         | Endocrine and metabolic diseases             | 0.00 | 0.00 | 0.00 | 0.00  | 0.00  | 0.00  | 0.00  | 0.00  | 0.00  | 0.00  | 0.00  | 0.01  | 0.01  | 0.02  | 0.02  | 0.03  |
|         | Infectious diseases                          | 0.00 | 0.00 | 0.00 | 0.00  | 0.00  | 0.00  | 0.00  | 0.01  | 0.01  | 0.02  | 0.03  | 0.02  | 0.02  | 0.01  | 0.01  | 0.02  |
|         | Injuries                                     | 0.00 | 0.01 | 0.01 | 0.01  | 0.06  | 0.08  | 0.07  | 0.07  | 0.06  | 0.06  | 0.06  | 0.06  | 0.05  | 0.04  | 0.04  | 0.04  |



| Country                                      | Cause Group                                  | 0-1  | 1-4  | 5-9  | 10-14 | 15-19 | 20-24 | 25-29 | 30-34 | 35-39 | 40-44 | 45-49 | 50-54 | 55-59 | 60-64 | 65-69 | 70-74 |
|----------------------------------------------|----------------------------------------------|------|------|------|-------|-------|-------|-------|-------|-------|-------|-------|-------|-------|-------|-------|-------|
| Sweden                                       | Nonavoidable deaths                          | 0.00 | 0.00 | 0.00 | 0.00  | 0.00  | 0.00  | 0.00  | 0.00  | 0.00  | 0.00  | 0.00  | 0.00  | 0.00  | 0.00  | 0.00  | 0.00  |
|                                              | Pregnancy, childbirth and perinatal period   | 0.15 | 0.00 | 0.00 | 0.00  | 0.00  | 0.00  | 0.00  | 0.00  | 0.00  | 0.00  | 0.00  | 0.00  | 0.00  | 0.00  | 0.00  | 0.00  |
|                                              | Adverse effects of medical and surgical care | 0.00 | 0.00 | 0.00 | 0.00  | 0.00  | 0.00  | 0.00  | 0.00  | 0.00  | 0.00  | 0.00  | 0.00  | 0.00  | 0.00  | 0.00  | 0.00  |
|                                              | Alcohol- related and drug related deaths     | 0.00 | 0.00 | 0.00 | 0.00  | 0.01  | 0.05  | 0.06  | 0.05  | 0.04  | 0.04  | 0.05  | 0.06  | 0.06  | 0.06  | 0.05  | 0.03  |
|                                              | Cancer                                       | 0.00 | 0.00 | 0.00 | 0.00  | 0.00  | 0.00  | 0.01  | 0.01  | 0.02  | 0.02  | 0.04  | 0.08  | 0.12  | 0.19  | 0.24  | 0.26  |
|                                              | Cardiovascular diseases                      | 0.00 | 0.00 | 0.00 | 0.00  | 0.00  | 0.00  | 0.00  | 0.00  | 0.01  | 0.02  | 0.04  | 0.08  | 0.13  | 0.19  | 0.24  | 0.28  |
|                                              | Cerebrovascular diseases                     | 0.00 | 0.00 | 0.00 | 0.00  | 0.00  | 0.00  | 0.00  | 0.00  | 0.00  | 0.01  | 0.01  | 0.02  | 0.02  | 0.04  | 0.05  | 0.08  |
|                                              | Congenital malformations                     | 0.02 | 0.00 | 0.00 | 0.00  | 0.00  | 0.00  | 0.00  | 0.00  | 0.00  | 0.00  | 0.00  | 0.00  | 0.00  | 0.00  | 0.00  | 0.00  |
|                                              | Diseases of the digestive system             | 0.00 | 0.00 | 0.00 | 0.00  | 0.00  | 0.00  | 0.00  | 0.00  | 0.00  | 0.00  | 0.00  | 0.00  | 0.01  | 0.01  | 0.01  | 0.01  |
|                                              | Diseases of the genitourinary system         | 0.00 | 0.00 | 0.00 | 0.00  | 0.00  | 0.00  | 0.00  | 0.00  | 0.00  | 0.00  | 0.00  | 0.00  | 0.00  | 0.00  | 0.01  | 0.01  |
|                                              | Diseases of the nervous system               | 0.00 | 0.00 | 0.00 | 0.00  | 0.00  | 0.00  | 0.00  | 0.00  | 0.00  | 0.00  | 0.00  | 0.00  | 0.00  | 0.00  | 0.00  | 0.00  |
|                                              | Diseases of the respiratory system           | 0.00 | 0.00 | 0.00 | 0.00  | 0.00  | 0.00  | 0.00  | 0.00  | 0.00  | 0.00  | 0.01  | 0.01  | 0.02  | 0.03  | 0.05  | 0.06  |
|                                              | Endocrine and metabolic diseases             | 0.00 | 0.00 | 0.00 | 0.00  | 0.00  | 0.00  | 0.00  | 0.00  | 0.00  | 0.00  | 0.01  | 0.01  | 0.01  | 0.02  | 0.03  | 0.03  |
|                                              | Infectious diseases                          | 0.00 | 0.00 | 0.00 | 0.00  | 0.00  | 0.00  | 0.00  | 0.00  | 0.00  | 0.00  | 0.01  | 0.01  | 0.01  | 0.01  | 0.01  | 0.02  |
| Injuries                                     | 0.00                                         | 0.01 | 0.01 | 0.01 | 0.06  | 0.10  | 0.08  | 0.06  | 0.05  | 0.06  | 0.06  | 0.06  | 0.06  | 0.05  | 0.05  | 0.04  |       |
| Nonavoidable deaths                          | 0.00                                         | 0.00 | 0.00 | 0.00 | 0.00  | 0.00  | 0.00  | 0.00  | 0.00  | 0.00  | 0.00  | 0.00  | 0.00  | 0.00  | 0.00  | 0.00  |       |
| Pregnancy, childbirth and perinatal period   | 0.10                                         | 0.00 | 0.00 | 0.00 | 0.00  | 0.00  | 0.00  | 0.00  | 0.00  | 0.00  | 0.00  | 0.00  | 0.00  | 0.00  | 0.00  | 0.00  |       |
| Adverse effects of medical and surgical care | 0.00                                         | 0.00 | 0.00 | 0.00 | 0.00  | 0.00  | 0.00  | 0.00  | 0.00  | 0.00  | 0.00  | 0.00  | 0.00  | 0.00  | 0.00  | 0.00  |       |
| Alcohol- related and drug related deaths     | 0.00                                         | 0.00 | 0.00 | 0.00 | 0.01  | 0.03  | 0.04  | 0.06  | 0.08  | 0.09  | 0.08  | 0.08  | 0.07  | 0.05  | 0.04  | 0.02  |       |
| Cancer                                       | 0.00                                         | 0.00 | 0.00 | 0.00 | 0.00  | 0.00  | 0.01  | 0.01  | 0.02  | 0.03  | 0.06  | 0.11  | 0.19  | 0.27  | 0.33  | 0.35  |       |
| Cardiovascular diseases                      | 0.00                                         | 0.00 | 0.00 | 0.00 | 0.00  | 0.00  | 0.01  | 0.01  | 0.03  | 0.05  | 0.09  | 0.13  | 0.17  | 0.22  | 0.27  | 0.31  |       |
| Cerebrovascular diseases                     | 0.00                                         | 0.00 | 0.00 | 0.00 | 0.00  | 0.00  | 0.00  | 0.00  | 0.01  | 0.01  | 0.02  | 0.02  | 0.03  | 0.04  | 0.05  | 0.08  |       |
| United Kingdom                               | Nonavoidable deaths                          | 0.00 | 0.00 | 0.00 | 0.00  | 0.00  | 0.00  | 0.00  | 0.00  | 0.00  | 0.00  | 0.00  | 0.00  | 0.00  | 0.00  | 0.00  | 0.00  |
|                                              | Pregnancy, childbirth and perinatal period   | 0.10 | 0.00 | 0.00 | 0.00  | 0.00  | 0.00  | 0.00  | 0.00  | 0.00  | 0.00  | 0.00  | 0.00  | 0.00  | 0.00  | 0.00  | 0.00  |
|                                              | Adverse effects of medical and surgical care | 0.00 | 0.00 | 0.00 | 0.00  | 0.00  | 0.00  | 0.00  | 0.00  | 0.00  | 0.00  | 0.00  | 0.00  | 0.00  | 0.00  | 0.00  | 0.00  |
|                                              | Alcohol- related and drug related deaths     | 0.00 | 0.00 | 0.00 | 0.00  | 0.01  | 0.03  | 0.04  | 0.06  | 0.08  | 0.09  | 0.08  | 0.08  | 0.07  | 0.05  | 0.04  | 0.02  |
|                                              | Cancer                                       | 0.00 | 0.00 | 0.00 | 0.00  | 0.00  | 0.00  | 0.01  | 0.01  | 0.02  | 0.03  | 0.06  | 0.11  | 0.19  | 0.27  | 0.33  | 0.35  |
|                                              | Cardiovascular diseases                      | 0.00 | 0.00 | 0.00 | 0.00  | 0.00  | 0.00  | 0.01  | 0.01  | 0.03  | 0.05  | 0.09  | 0.13  | 0.17  | 0.22  | 0.27  | 0.31  |

| Country                   | Cause Group                                  | 0-1  | 1-4  | 5-9  | 10-14 | 15-19 | 20-24 | 25-29 | 30-34 | 35-39 | 40-44 | 45-49 | 50-54 | 55-59 | 60-64 | 65-69 | 70-74 |
|---------------------------|----------------------------------------------|------|------|------|-------|-------|-------|-------|-------|-------|-------|-------|-------|-------|-------|-------|-------|
|                           | Congenital malformations                     | 0.03 | 0.00 | 0.00 | 0.00  | 0.00  | 0.00  | 0.00  | 0.00  | 0.00  | 0.00  | 0.00  | 0.00  | 0.00  | 0.00  | 0.00  | 0.00  |
|                           | Diseases of the digestive system             | 0.00 | 0.00 | 0.00 | 0.00  | 0.00  | 0.00  | 0.00  | 0.00  | 0.00  | 0.00  | 0.01  | 0.01  | 0.01  | 0.01  | 0.01  | 0.02  |
|                           | Diseases of the genitourinary system         | 0.00 | 0.00 | 0.00 | 0.00  | 0.00  | 0.00  | 0.00  | 0.00  | 0.00  | 0.00  | 0.00  | 0.00  | 0.00  | 0.00  | 0.00  | 0.01  |
|                           | Diseases of the nervous system               | 0.00 | 0.00 | 0.00 | 0.00  | 0.00  | 0.00  | 0.00  | 0.00  | 0.00  | 0.00  | 0.00  | 0.00  | 0.00  | 0.00  | 0.00  | 0.00  |
|                           | Diseases of the respiratory system           | 0.01 | 0.01 | 0.00 | 0.00  | 0.00  | 0.00  | 0.00  | 0.01  | 0.01  | 0.01  | 0.02  | 0.03  | 0.05  | 0.08  | 0.11  | 0.15  |
|                           | Endocrine and metabolic diseases             | 0.00 | 0.00 | 0.00 | 0.00  | 0.00  | 0.00  | 0.00  | 0.00  | 0.00  | 0.00  | 0.01  | 0.01  | 0.01  | 0.01  | 0.01  | 0.02  |
|                           | Infectious diseases                          | 0.01 | 0.00 | 0.00 | 0.00  | 0.00  | 0.00  | 0.00  | 0.00  | 0.00  | 0.01  | 0.01  | 0.01  | 0.01  | 0.01  | 0.01  | 0.01  |
|                           | Injuries                                     | 0.01 | 0.01 | 0.01 | 0.01  | 0.07  | 0.09  | 0.08  | 0.07  | 0.07  | 0.07  | 0.06  | 0.05  | 0.04  | 0.03  | 0.02  | 0.02  |
|                           | Nonavoidable deaths                          | 0.00 | 0.00 | 0.00 | 0.00  | 0.00  | 0.00  | 0.00  | 0.00  | 0.00  | 0.00  | 0.00  | 0.00  | 0.00  | 0.00  | 0.00  | 0.00  |
|                           | Pregnancy, childbirth and perinatal period   | 0.22 | 0.00 | 0.00 | 0.00  | 0.00  | 0.00  | 0.00  | 0.00  | 0.00  | 0.00  | 0.00  | 0.00  | 0.00  | 0.00  | 0.00  | 0.00  |
| Established member states | Adverse effects of medical and surgical care | 0.00 | 0.00 | 0.00 | 0.00  | 0.00  | 0.00  | 0.00  | 0.00  | 0.00  | 0.00  | 0.00  | 0.00  | 0.00  | 0.00  | 0.00  | 0.00  |
|                           | Alcohol- related and drug related deaths     | 0.00 | 0.00 | 0.00 | 0.00  | 0.01  | 0.02  | 0.03  | 0.03  | 0.04  | 0.05  | 0.07  | 0.08  | 0.08  | 0.07  | 0.06  | 0.04  |
|                           | Cancer                                       | 0.00 | 0.00 | 0.00 | 0.00  | 0.00  | 0.00  | 0.01  | 0.01  | 0.02  | 0.04  | 0.07  | 0.14  | 0.21  | 0.29  | 0.34  | 0.34  |
|                           | Cardiovascular diseases                      | 0.00 | 0.00 | 0.00 | 0.00  | 0.00  | 0.00  | 0.00  | 0.01  | 0.02  | 0.03  | 0.06  | 0.09  | 0.13  | 0.17  | 0.21  | 0.24  |
|                           | Cerebrovascular diseases                     | 0.00 | 0.00 | 0.00 | 0.00  | 0.00  | 0.00  | 0.00  | 0.00  | 0.01  | 0.01  | 0.01  | 0.02  | 0.03  | 0.04  | 0.06  | 0.08  |
|                           | Congenital malformations                     | 0.03 | 0.00 | 0.00 | 0.00  | 0.00  | 0.00  | 0.00  | 0.00  | 0.00  | 0.00  | 0.00  | 0.00  | 0.00  | 0.00  | 0.00  | 0.00  |
|                           | Diseases of the digestive system             | 0.00 | 0.00 | 0.00 | 0.00  | 0.00  | 0.00  | 0.00  | 0.00  | 0.00  | 0.00  | 0.00  | 0.01  | 0.01  | 0.01  | 0.01  | 0.01  |
|                           | Diseases of the genitourinary system         | 0.00 | 0.00 | 0.00 | 0.00  | 0.00  | 0.00  | 0.00  | 0.00  | 0.00  | 0.00  | 0.00  | 0.00  | 0.00  | 0.01  | 0.01  | 0.01  |
|                           | Diseases of the nervous system               | 0.00 | 0.00 | 0.00 | 0.00  | 0.00  | 0.00  | 0.00  | 0.00  | 0.00  | 0.00  | 0.00  | 0.00  | 0.00  | 0.00  | 0.00  | 0.00  |
|                           | Diseases of the respiratory system           | 0.00 | 0.00 | 0.00 | 0.00  | 0.00  | 0.00  | 0.00  | 0.00  | 0.00  | 0.01  | 0.01  | 0.02  | 0.03  | 0.05  | 0.07  | 0.10  |
|                           | Endocrine and metabolic diseases             | 0.00 | 0.00 | 0.00 | 0.00  | 0.00  | 0.00  | 0.00  | 0.00  | 0.00  | 0.00  | 0.01  | 0.01  | 0.02  | 0.02  | 0.03  | 0.03  |
|                           | Infectious diseases                          | 0.00 | 0.00 | 0.00 | 0.00  | 0.00  | 0.00  | 0.00  | 0.00  | 0.01  | 0.01  | 0.01  | 0.01  | 0.01  | 0.01  | 0.01  | 0.02  |

| Country           | Cause Group                                  | 0-1  | 1-4  | 5-9  | 10-14 | 15-19 | 20-24 | 25-29 | 30-34 | 35-39 | 40-44 | 45-49 | 50-54 | 55-59 | 60-64 | 65-69 | 70-74 |
|-------------------|----------------------------------------------|------|------|------|-------|-------|-------|-------|-------|-------|-------|-------|-------|-------|-------|-------|-------|
|                   | Injuries                                     | 0.01 | 0.01 | 0.01 | 0.01  | 0.07  | 0.10  | 0.09  | 0.08  | 0.07  | 0.07  | 0.07  | 0.07  | 0.06  | 0.05  | 0.05  | 0.04  |
|                   | Nonavoidable deaths                          | 0.00 | 0.00 | 0.00 | 0.00  | 0.00  | 0.00  | 0.00  | 0.00  | 0.00  | 0.00  | 0.00  | 0.00  | 0.00  | 0.00  | 0.00  | 0.00  |
|                   | Pregnancy, childbirth and perinatal period   | 0.15 | 0.00 | 0.00 | 0.00  | 0.00  | 0.00  | 0.00  | 0.00  | 0.00  | 0.00  | 0.00  | 0.00  | 0.00  | 0.00  | 0.00  | 0.00  |
| New member states | Adverse effects of medical and surgical care | 0.00 | 0.00 | 0.00 | 0.00  | 0.00  | 0.00  | 0.00  | 0.00  | 0.00  | 0.00  | 0.00  | 0.00  | 0.00  | 0.00  | 0.00  | 0.00  |
|                   | Alcohol- related and drug related deaths     | 0.00 | 0.00 | 0.00 | 0.00  | 0.00  | 0.02  | 0.04  | 0.05  | 0.07  | 0.09  | 0.12  | 0.14  | 0.13  | 0.11  | 0.08  | 0.05  |
|                   | Cancer                                       | 0.00 | 0.00 | 0.00 | 0.00  | 0.00  | 0.01  | 0.01  | 0.01  | 0.02  | 0.05  | 0.10  | 0.19  | 0.29  | 0.37  | 0.39  | 0.35  |
|                   | Cardiovascular diseases                      | 0.00 | 0.00 | 0.00 | 0.00  | 0.00  | 0.00  | 0.01  | 0.02  | 0.04  | 0.08  | 0.14  | 0.22  | 0.31  | 0.40  | 0.45  | 0.47  |
|                   | Cerebrovascular diseases                     | 0.00 | 0.00 | 0.00 | 0.00  | 0.00  | 0.00  | 0.00  | 0.01  | 0.01  | 0.02  | 0.04  | 0.06  | 0.09  | 0.12  | 0.16  | 0.19  |
|                   | Congenital malformations                     | 0.05 | 0.00 | 0.00 | 0.00  | 0.00  | 0.00  | 0.00  | 0.00  | 0.00  | 0.00  | 0.00  | 0.00  | 0.00  | 0.00  | 0.00  | 0.00  |
|                   | Diseases of the digestive system             | 0.00 | 0.00 | 0.00 | 0.00  | 0.00  | 0.00  | 0.00  | 0.00  | 0.01  | 0.01  | 0.01  | 0.02  | 0.02  | 0.02  | 0.02  | 0.02  |
|                   | Diseases of the genitourinary system         | 0.00 | 0.00 | 0.00 | 0.00  | 0.00  | 0.00  | 0.00  | 0.00  | 0.00  | 0.00  | 0.00  | 0.01  | 0.01  | 0.01  | 0.01  | 0.01  |
|                   | Diseases of the nervous system               | 0.00 | 0.00 | 0.00 | 0.00  | 0.00  | 0.00  | 0.00  | 0.00  | 0.00  | 0.01  | 0.01  | 0.01  | 0.00  | 0.00  | 0.00  | 0.00  |
|                   | Diseases of the respiratory system           | 0.03 | 0.01 | 0.00 | 0.00  | 0.00  | 0.00  | 0.01  | 0.01  | 0.01  | 0.02  | 0.03  | 0.04  | 0.05  | 0.07  | 0.08  | 0.09  |
|                   | Endocrine and metabolic diseases             | 0.00 | 0.00 | 0.00 | 0.00  | 0.00  | 0.00  | 0.00  | 0.00  | 0.00  | 0.01  | 0.01  | 0.01  | 0.02  | 0.03  | 0.03  | 0.04  |
|                   | Infectious diseases                          | 0.01 | 0.00 | 0.00 | 0.00  | 0.00  | 0.00  | 0.01  | 0.01  | 0.01  | 0.02  | 0.02  | 0.02  | 0.02  | 0.02  | 0.01  | 0.01  |
|                   | Injuries                                     | 0.01 | 0.02 | 0.02 | 0.03  | 0.11  | 0.16  | 0.15  | 0.14  | 0.14  | 0.15  | 0.15  | 0.15  | 0.13  | 0.10  | 0.07  | 0.06  |
|                   | Nonavoidable deaths                          | 0.00 | 0.00 | 0.00 | 0.00  | 0.00  | 0.00  | 0.00  | 0.00  | 0.00  | 0.00  | 0.00  | 0.00  | 0.00  | 0.00  | 0.00  | 0.00  |
|                   | Pregnancy, childbirth and perinatal period   | 0.20 | 0.00 | 0.00 | 0.00  | 0.00  | 0.00  | 0.00  | 0.00  | 0.00  | 0.00  | 0.00  | 0.00  | 0.00  | 0.00  | 0.00  | 0.00  |

**Supplementary Table 6: The average contribution of cause groups to the estimated gains in female life expectancy by EU member state if all avoidable deaths were averted, 2005-2019**

| Country | Cause Group                                  | 0-1  | 1-4  | 5-9  | 10-14 | 15-19 | 20-24 | 25-29 | 30-34 | 35-39 | 40-44 | 45-49 | 50-54 | 55-59 | 60-64 | 65-69 | 70-74 |
|---------|----------------------------------------------|------|------|------|-------|-------|-------|-------|-------|-------|-------|-------|-------|-------|-------|-------|-------|
| Austria | Adverse effects of medical and surgical care | 0.00 | 0.00 | 0.00 | 0.00  | 0.00  | 0.00  | 0.00  | 0.00  | 0.00  | 0.00  | 0.00  | 0.00  | 0.00  | 0.00  | 0.00  | 0.00  |
|         | Alcohol- related and drug related deaths     | 0.00 | 0.00 | 0.00 | 0.00  | 0.01  | 0.01  | 0.01  | 0.01  | 0.01  | 0.02  | 0.02  | 0.03  | 0.03  | 0.03  | 0.03  | 0.02  |
|         | Cancer                                       | 0.00 | 0.00 | 0.00 | 0.00  | 0.00  | 0.00  | 0.01  | 0.02  | 0.03  | 0.06  | 0.09  | 0.14  | 0.19  | 0.23  | 0.25  | 0.24  |
|         | Cardiovascular diseases                      | 0.00 | 0.00 | 0.00 | 0.00  | 0.00  | 0.00  | 0.00  | 0.00  | 0.01  | 0.01  | 0.02  | 0.03  | 0.04  | 0.07  | 0.11  | 0.18  |
|         | Cerebrovascular diseases                     | 0.00 | 0.00 | 0.00 | 0.00  | 0.00  | 0.00  | 0.00  | 0.00  | 0.00  | 0.01  | 0.01  | 0.01  | 0.02  | 0.02  | 0.03  | 0.06  |
|         | Congenital malformations                     | 0.03 | 0.00 | 0.00 | 0.00  | 0.00  | 0.00  | 0.00  | 0.00  | 0.00  | 0.00  | 0.00  | 0.00  | 0.00  | 0.00  | 0.00  | 0.00  |
|         | Diseases of the digestive system             | 0.00 | 0.00 | 0.00 | 0.00  | 0.00  | 0.00  | 0.00  | 0.00  | 0.00  | 0.00  | 0.00  | 0.00  | 0.00  | 0.00  | 0.01  | 0.01  |
|         | Diseases of the genitourinary system         | 0.00 | 0.00 | 0.00 | 0.00  | 0.00  | 0.00  | 0.00  | 0.00  | 0.00  | 0.00  | 0.00  | 0.00  | 0.00  | 0.00  | 0.01  | 0.01  |
|         | Diseases of the nervous system               | 0.00 | 0.00 | 0.00 | 0.00  | 0.00  | 0.00  | 0.00  | 0.00  | 0.00  | 0.00  | 0.00  | 0.00  | 0.00  | 0.00  | 0.00  | 0.00  |
|         | Diseases of the respiratory system           | 0.00 | 0.00 | 0.00 | 0.00  | 0.00  | 0.00  | 0.00  | 0.00  | 0.00  | 0.00  | 0.01  | 0.01  | 0.02  | 0.03  | 0.05  | 0.06  |
|         | Endocrine and metabolic diseases             | 0.00 | 0.00 | 0.00 | 0.00  | 0.00  | 0.00  | 0.00  | 0.00  | 0.00  | 0.00  | 0.00  | 0.01  | 0.01  | 0.02  | 0.03  | 0.04  |
|         | Infectious diseases                          | 0.00 | 0.00 | 0.00 | 0.00  | 0.00  | 0.00  | 0.00  | 0.00  | 0.00  | 0.00  | 0.00  | 0.00  | 0.00  | 0.00  | 0.01  | 0.01  |
|         | Injuries                                     | 0.00 | 0.01 | 0.00 | 0.01  | 0.03  | 0.03  | 0.02  | 0.02  | 0.02  | 0.02  | 0.02  | 0.03  | 0.03  | 0.02  | 0.02  | 0.03  |
|         | Nonavoidable deaths                          | 0.00 | 0.00 | 0.00 | 0.00  | 0.00  | 0.00  | 0.00  | 0.00  | 0.00  | 0.00  | 0.00  | 0.00  | 0.00  | 0.00  | 0.00  | 0.00  |
|         | Pregnancy, childbirth and perinatal period   | 0.14 | 0.00 | 0.00 | 0.00  | 0.00  | 0.00  | 0.00  | 0.00  | 0.00  | 0.00  | 0.00  | 0.00  | 0.00  | 0.00  | 0.00  | 0.00  |
| Belgium | Adverse effects of medical and surgical care | 0.00 | 0.00 | 0.00 | 0.00  | 0.00  | 0.00  | 0.00  | 0.00  | 0.00  | 0.00  | 0.00  | 0.00  | 0.00  | 0.00  | 0.00  | 0.00  |
|         | Alcohol- related and drug related deaths     | 0.00 | 0.00 | 0.00 | 0.00  | 0.00  | 0.00  | 0.01  | 0.01  | 0.02  | 0.02  | 0.03  | 0.04  | 0.04  | 0.03  | 0.03  | 0.02  |
|         | Cancer                                       | 0.00 | 0.00 | 0.00 | 0.00  | 0.00  | 0.00  | 0.01  | 0.02  | 0.04  | 0.06  | 0.10  | 0.16  | 0.21  | 0.25  | 0.26  | 0.25  |
|         | Cardiovascular diseases                      | 0.00 | 0.00 | 0.00 | 0.00  | 0.00  | 0.00  | 0.00  | 0.00  | 0.00  | 0.01  | 0.02  | 0.02  | 0.04  | 0.05  | 0.07  | 0.10  |
|         | Cerebrovascular diseases                     | 0.00 | 0.00 | 0.00 | 0.00  | 0.00  | 0.00  | 0.00  | 0.00  | 0.01  | 0.01  | 0.01  | 0.02  | 0.02  | 0.03  | 0.04  | 0.06  |

| Country  | Cause Group                                  | 0-1  | 1-4  | 5-9  | 10-14 | 15-19 | 20-24 | 25-29 | 30-34 | 35-39 | 40-44 | 45-49 | 50-54 | 55-59 | 60-64 | 65-69 | 70-74 |
|----------|----------------------------------------------|------|------|------|-------|-------|-------|-------|-------|-------|-------|-------|-------|-------|-------|-------|-------|
|          | Congenital malformations                     | 0.02 | 0.00 | 0.00 | 0.00  | 0.00  | 0.00  | 0.00  | 0.00  | 0.00  | 0.00  | 0.00  | 0.00  | 0.00  | 0.00  | 0.00  | 0.00  |
|          | Diseases of the digestive system             | 0.00 | 0.00 | 0.00 | 0.00  | 0.00  | 0.00  | 0.00  | 0.00  | 0.00  | 0.00  | 0.00  | 0.00  | 0.00  | 0.00  | 0.01  | 0.01  |
|          | Diseases of the genitourinary system         | 0.00 | 0.00 | 0.00 | 0.00  | 0.00  | 0.00  | 0.00  | 0.00  | 0.00  | 0.00  | 0.00  | 0.00  | 0.00  | 0.00  | 0.01  | 0.01  |
|          | Diseases of the nervous system               | 0.00 | 0.00 | 0.00 | 0.00  | 0.00  | 0.00  | 0.00  | 0.00  | 0.00  | 0.00  | 0.00  | 0.00  | 0.00  | 0.00  | 0.00  | 0.00  |
|          | Diseases of the respiratory system           | 0.00 | 0.00 | 0.00 | 0.00  | 0.00  | 0.00  | 0.00  | 0.00  | 0.00  | 0.01  | 0.01  | 0.02  | 0.03  | 0.05  | 0.07  | 0.08  |
|          | Endocrine and metabolic diseases             | 0.00 | 0.00 | 0.00 | 0.00  | 0.00  | 0.00  | 0.00  | 0.00  | 0.00  | 0.00  | 0.00  | 0.00  | 0.01  | 0.01  | 0.01  | 0.02  |
|          | Infectious diseases                          | 0.00 | 0.00 | 0.00 | 0.00  | 0.00  | 0.00  | 0.00  | 0.00  | 0.00  | 0.00  | 0.00  | 0.01  | 0.01  | 0.01  | 0.01  | 0.02  |
|          | Injuries                                     | 0.01 | 0.01 | 0.01 | 0.01  | 0.03  | 0.03  | 0.03  | 0.03  | 0.03  | 0.04  | 0.04  | 0.04  | 0.04  | 0.04  | 0.03  | 0.04  |
|          | Nonavoidable deaths                          | 0.00 | 0.00 | 0.00 | 0.00  | 0.00  | 0.00  | 0.00  | 0.00  | 0.00  | 0.00  | 0.00  | 0.00  | 0.00  | 0.00  | 0.00  | 0.00  |
|          | Pregnancy, childbirth and perinatal period   | 0.13 | 0.00 | 0.00 | 0.00  | 0.00  | 0.00  | 0.00  | 0.00  | 0.00  | 0.00  | 0.00  | 0.00  | 0.00  | 0.00  | 0.00  | 0.00  |
| Bulgaria | Adverse effects of medical and surgical care | 0.00 | 0.00 | 0.00 | 0.00  | 0.00  | 0.00  | 0.00  | 0.00  | 0.00  | 0.00  | 0.00  | 0.00  | 0.00  | 0.00  | 0.00  | 0.00  |
|          | Alcohol- related and drug related deaths     | 0.00 | 0.00 | 0.00 | 0.00  | 0.00  | 0.00  | 0.00  | 0.01  | 0.01  | 0.01  | 0.02  | 0.02  | 0.02  | 0.02  | 0.02  | 0.02  |
|          | Cancer                                       | 0.00 | 0.00 | 0.00 | 0.00  | 0.00  | 0.01  | 0.01  | 0.03  | 0.06  | 0.09  | 0.13  | 0.17  | 0.19  | 0.20  | 0.19  | 0.17  |
|          | Cardiovascular diseases                      | 0.00 | 0.00 | 0.00 | 0.00  | 0.00  | 0.00  | 0.01  | 0.01  | 0.01  | 0.03  | 0.05  | 0.08  | 0.12  | 0.17  | 0.23  | 0.32  |
|          | Cerebrovascular diseases                     | 0.01 | 0.00 | 0.00 | 0.00  | 0.00  | 0.00  | 0.00  | 0.01  | 0.01  | 0.02  | 0.04  | 0.06  | 0.09  | 0.13  | 0.20  | 0.29  |
|          | Congenital malformations                     | 0.06 | 0.01 | 0.00 | 0.00  | 0.00  | 0.00  | 0.00  | 0.00  | 0.00  | 0.00  | 0.00  | 0.00  | 0.00  | 0.00  | 0.00  | 0.00  |
|          | Diseases of the digestive system             | 0.00 | 0.00 | 0.00 | 0.00  | 0.00  | 0.00  | 0.00  | 0.00  | 0.00  | 0.00  | 0.00  | 0.00  | 0.00  | 0.01  | 0.01  | 0.01  |
|          | Diseases of the genitourinary system         | 0.00 | 0.00 | 0.00 | 0.00  | 0.00  | 0.00  | 0.00  | 0.00  | 0.00  | 0.01  | 0.01  | 0.01  | 0.01  | 0.01  | 0.02  | 0.02  |
|          | Diseases of the nervous system               | 0.00 | 0.00 | 0.00 | 0.00  | 0.00  | 0.00  | 0.00  | 0.00  | 0.00  | 0.00  | 0.00  | 0.00  | 0.00  | 0.00  | 0.00  | 0.00  |
|          | Diseases of the respiratory system           | 0.07 | 0.02 | 0.01 | 0.01  | 0.01  | 0.01  | 0.01  | 0.01  | 0.01  | 0.01  | 0.01  | 0.01  | 0.02  | 0.02  | 0.03  | 0.03  |
|          | Endocrine and metabolic diseases             | 0.00 | 0.00 | 0.00 | 0.00  | 0.00  | 0.00  | 0.00  | 0.00  | 0.00  | 0.00  | 0.01  | 0.01  | 0.01  | 0.02  | 0.03  | 0.04  |
|          | Infectious diseases                          | 0.02 | 0.01 | 0.00 | 0.00  | 0.00  | 0.00  | 0.00  | 0.00  | 0.00  | 0.00  | 0.01  | 0.00  | 0.01  | 0.01  | 0.01  | 0.01  |

| Country                                      | Cause Group                                  | 0-1      | 1-4  | 5-9  | 10-14 | 15-19 | 20-24 | 25-29 | 30-34 | 35-39 | 40-44 | 45-49 | 50-54 | 55-59 | 60-64 | 65-69 | 70-74 |      |
|----------------------------------------------|----------------------------------------------|----------|------|------|-------|-------|-------|-------|-------|-------|-------|-------|-------|-------|-------|-------|-------|------|
| Croatia                                      | Injuries                                     | 0.01     | 0.02 | 0.01 | 0.02  | 0.04  | 0.03  | 0.02  | 0.02  | 0.02  | 0.02  | 0.02  | 0.02  | 0.02  | 0.02  | 0.01  | 0.01  |      |
|                                              | Nonavoidable deaths                          | 0.00     | 0.00 | 0.00 | 0.00  | 0.00  | 0.00  | 0.00  | 0.00  | 0.00  | 0.00  | 0.00  | 0.00  | 0.00  | 0.00  | 0.00  | 0.00  | 0.00 |
|                                              | Pregnancy, childbirth and perinatal period   | 0.24     | 0.00 | 0.00 | 0.00  | 0.00  | 0.00  | 0.00  | 0.00  | 0.00  | 0.00  | 0.00  | 0.00  | 0.00  | 0.00  | 0.00  | 0.00  | 0.00 |
|                                              | Adverse effects of medical and surgical care | 0.00     | 0.00 | 0.00 | 0.00  | 0.00  | 0.00  | 0.00  | 0.00  | 0.00  | 0.00  | 0.00  | 0.00  | 0.00  | 0.00  | 0.00  | 0.00  | 0.00 |
|                                              | Alcohol- related and drug related deaths     | 0.00     | 0.00 | 0.00 | 0.00  | 0.00  | 0.00  | 0.00  | 0.00  | 0.00  | 0.01  | 0.01  | 0.02  | 0.03  | 0.03  | 0.03  | 0.03  | 0.02 |
|                                              | Cancer                                       | 0.00     | 0.00 | 0.00 | 0.00  | 0.00  | 0.00  | 0.00  | 0.01  | 0.02  | 0.04  | 0.07  | 0.12  | 0.17  | 0.22  | 0.24  | 0.26  | 0.24 |
|                                              | Cardiovascular diseases                      | 0.00     | 0.00 | 0.00 | 0.00  | 0.00  | 0.00  | 0.00  | 0.00  | 0.00  | 0.01  | 0.01  | 0.03  | 0.04  | 0.07  | 0.11  | 0.18  | 0.28 |
|                                              | Cerebrovascular diseases                     | 0.00     | 0.00 | 0.00 | 0.00  | 0.00  | 0.00  | 0.00  | 0.00  | 0.00  | 0.00  | 0.01  | 0.02  | 0.03  | 0.04  | 0.07  | 0.12  | 0.20 |
|                                              | Congenital malformations                     | 0.03     | 0.00 | 0.00 | 0.00  | 0.00  | 0.00  | 0.00  | 0.00  | 0.00  | 0.00  | 0.00  | 0.00  | 0.00  | 0.00  | 0.00  | 0.00  | 0.00 |
|                                              | Diseases of the digestive system             | 0.00     | 0.00 | 0.00 | 0.00  | 0.00  | 0.00  | 0.00  | 0.00  | 0.00  | 0.00  | 0.00  | 0.00  | 0.00  | 0.01  | 0.01  | 0.01  | 0.01 |
|                                              | Diseases of the genitourinary system         | 0.00     | 0.00 | 0.00 | 0.00  | 0.00  | 0.00  | 0.00  | 0.00  | 0.00  | 0.00  | 0.00  | 0.00  | 0.00  | 0.00  | 0.01  | 0.01  | 0.01 |
|                                              | Diseases of the nervous system               | 0.00     | 0.00 | 0.00 | 0.00  | 0.00  | 0.00  | 0.00  | 0.00  | 0.00  | 0.00  | 0.00  | 0.00  | 0.00  | 0.00  | 0.00  | 0.00  | 0.00 |
|                                              | Diseases of the respiratory system           | 0.01     | 0.00 | 0.00 | 0.00  | 0.00  | 0.00  | 0.00  | 0.00  | 0.00  | 0.00  | 0.01  | 0.01  | 0.01  | 0.02  | 0.02  | 0.03  | 0.04 |
|                                              | Endocrine and metabolic diseases             | 0.00     | 0.00 | 0.00 | 0.00  | 0.00  | 0.00  | 0.00  | 0.00  | 0.00  | 0.00  | 0.00  | 0.00  | 0.01  | 0.01  | 0.02  | 0.03  | 0.06 |
|                                              | Infectious diseases                          | 0.00     | 0.00 | 0.00 | 0.00  | 0.00  | 0.00  | 0.00  | 0.00  | 0.00  | 0.00  | 0.00  | 0.00  | 0.00  | 0.00  | 0.01  | 0.01  | 0.01 |
|                                              | Cyprus                                       | Injuries | 0.01 | 0.01 | 0.01  | 0.01  | 0.03  | 0.03  | 0.02  | 0.02  | 0.02  | 0.02  | 0.03  | 0.03  | 0.03  | 0.03  | 0.03  | 0.03 |
| Nonavoidable deaths                          |                                              | 0.00     | 0.00 | 0.00 | 0.00  | 0.00  | 0.00  | 0.00  | 0.00  | 0.00  | 0.00  | 0.00  | 0.00  | 0.00  | 0.00  | 0.00  | 0.00  | 0.00 |
| Pregnancy, childbirth and perinatal period   |                                              | 0.19     | 0.00 | 0.00 | 0.00  | 0.00  | 0.00  | 0.00  | 0.00  | 0.00  | 0.00  | 0.00  | 0.00  | 0.00  | 0.00  | 0.00  | 0.00  | 0.00 |
| Adverse effects of medical and surgical care |                                              | 0.00     | 0.00 | 0.00 | 0.00  | 0.00  | 0.00  | 0.00  | 0.00  | 0.00  | 0.00  | 0.00  | 0.00  | 0.00  | 0.00  | 0.00  | 0.00  | 0.00 |
| Alcohol- related and drug related deaths     |                                              | 0.00     | 0.00 | 0.00 | 0.00  | 0.00  | 0.00  | 0.00  | 0.00  | 0.00  | 0.00  | 0.01  | 0.00  | 0.01  | 0.01  | 0.01  | 0.01  | 0.01 |
| Cancer                                       |                                              | 0.00     | 0.00 | 0.00 | 0.00  | 0.00  | 0.00  | 0.00  | 0.01  | 0.02  | 0.02  | 0.05  | 0.07  | 0.11  | 0.15  | 0.17  | 0.17  | 0.17 |
| Cardiovascular diseases                      |                                              | 0.00     | 0.00 | 0.00 | 0.00  | 0.00  | 0.00  | 0.00  | 0.00  | 0.01  | 0.01  | 0.02  | 0.02  | 0.04  | 0.04  | 0.06  | 0.09  | 0.12 |

| Country                            | Cause Group                                  | 0-1  | 1-4  | 5-9  | 10-14 | 15-19 | 20-24 | 25-29 | 30-34 | 35-39 | 40-44 | 45-49 | 50-54 | 55-59 | 60-64 | 65-69 | 70-74 |      |
|------------------------------------|----------------------------------------------|------|------|------|-------|-------|-------|-------|-------|-------|-------|-------|-------|-------|-------|-------|-------|------|
| Czech Republic                     | Cerebrovascular diseases                     | 0.00 | 0.00 | 0.00 | 0.00  | 0.00  | 0.00  | 0.00  | 0.00  | 0.00  | 0.01  | 0.01  | 0.01  | 0.01  | 0.02  | 0.03  | 0.06  |      |
|                                    | Congenital malformations                     | 0.02 | 0.00 | 0.00 | 0.00  | 0.00  | 0.00  | 0.00  | 0.00  | 0.00  | 0.00  | 0.00  | 0.00  | 0.00  | 0.00  | 0.00  | 0.00  | 0.00 |
|                                    | Diseases of the digestive system             | 0.00 | 0.00 | 0.00 | 0.00  | 0.00  | 0.00  | 0.00  | 0.00  | 0.00  | 0.00  | 0.00  | 0.00  | 0.00  | 0.00  | 0.00  | 0.00  | 0.01 |
|                                    | Diseases of the genitourinary system         | 0.00 | 0.00 | 0.00 | 0.00  | 0.00  | 0.00  | 0.00  | 0.00  | 0.00  | 0.00  | 0.00  | 0.00  | 0.00  | 0.00  | 0.00  | 0.01  | 0.01 |
|                                    | Diseases of the nervous system               | 0.00 | 0.00 | 0.00 | 0.00  | 0.00  | 0.00  | 0.00  | 0.00  | 0.00  | 0.00  | 0.00  | 0.00  | 0.00  | 0.00  | 0.00  | 0.00  | 0.00 |
|                                    | Diseases of the respiratory system           | 0.00 | 0.00 | 0.00 | 0.00  | 0.00  | 0.00  | 0.00  | 0.00  | 0.00  | 0.00  | 0.00  | 0.00  | 0.01  | 0.01  | 0.01  | 0.02  | 0.03 |
|                                    | Endocrine and metabolic diseases             | 0.00 | 0.00 | 0.00 | 0.00  | 0.00  | 0.00  | 0.00  | 0.00  | 0.00  | 0.00  | 0.00  | 0.00  | 0.00  | 0.01  | 0.02  | 0.04  | 0.08 |
|                                    | Infectious diseases                          | 0.01 | 0.00 | 0.00 | 0.00  | 0.00  | 0.00  | 0.00  | 0.00  | 0.00  | 0.00  | 0.00  | 0.00  | 0.00  | 0.00  | 0.01  | 0.01  | 0.01 |
|                                    | Injuries                                     | 0.01 | 0.01 | 0.02 | 0.01  | 0.02  | 0.02  | 0.02  | 0.03  | 0.03  | 0.02  | 0.02  | 0.02  | 0.01  | 0.01  | 0.02  | 0.02  | 0.02 |
|                                    | Nonavoidable deaths                          | 0.00 | 0.00 | 0.00 | 0.00  | 0.00  | 0.00  | 0.00  | 0.00  | 0.00  | 0.00  | 0.00  | 0.00  | 0.00  | 0.00  | 0.00  | 0.00  | 0.00 |
|                                    | Pregnancy, childbirth and perinatal period   | 0.11 | 0.00 | 0.00 | 0.00  | 0.00  | 0.00  | 0.00  | 0.00  | 0.00  | 0.00  | 0.00  | 0.00  | 0.00  | 0.00  | 0.00  | 0.00  | 0.00 |
|                                    | Adverse effects of medical and surgical care | 0.00 | 0.00 | 0.00 | 0.00  | 0.00  | 0.00  | 0.00  | 0.00  | 0.00  | 0.00  | 0.00  | 0.00  | 0.00  | 0.00  | 0.00  | 0.00  | 0.00 |
|                                    | Alcohol- related and drug related deaths     | 0.00 | 0.00 | 0.00 | 0.00  | 0.00  | 0.00  | 0.00  | 0.01  | 0.01  | 0.02  | 0.03  | 0.04  | 0.04  | 0.04  | 0.04  | 0.02  | 0.01 |
|                                    | Cancer                                       | 0.00 | 0.00 | 0.00 | 0.00  | 0.00  | 0.00  | 0.00  | 0.01  | 0.02  | 0.03  | 0.06  | 0.09  | 0.13  | 0.18  | 0.24  | 0.26  | 0.25 |
|                                    | Cardiovascular diseases                      | 0.00 | 0.00 | 0.00 | 0.00  | 0.00  | 0.00  | 0.00  | 0.00  | 0.00  | 0.01  | 0.02  | 0.03  | 0.05  | 0.08  | 0.13  | 0.21  | 0.32 |
|                                    | Cerebrovascular diseases                     | 0.00 | 0.00 | 0.00 | 0.00  | 0.00  | 0.00  | 0.00  | 0.00  | 0.00  | 0.00  | 0.01  | 0.01  | 0.02  | 0.02  | 0.04  | 0.07  | 0.11 |
|                                    | Congenital malformations                     | 0.02 | 0.00 | 0.00 | 0.00  | 0.00  | 0.00  | 0.00  | 0.00  | 0.00  | 0.00  | 0.00  | 0.00  | 0.00  | 0.00  | 0.00  | 0.00  | 0.00 |
|                                    | Diseases of the digestive system             | 0.00 | 0.00 | 0.00 | 0.00  | 0.00  | 0.00  | 0.00  | 0.00  | 0.00  | 0.00  | 0.00  | 0.00  | 0.00  | 0.01  | 0.01  | 0.01  | 0.02 |
|                                    | Diseases of the genitourinary system         | 0.00 | 0.00 | 0.00 | 0.00  | 0.00  | 0.00  | 0.00  | 0.00  | 0.00  | 0.00  | 0.00  | 0.00  | 0.00  | 0.00  | 0.01  | 0.01  | 0.01 |
|                                    | Diseases of the nervous system               | 0.00 | 0.00 | 0.00 | 0.00  | 0.00  | 0.00  | 0.00  | 0.00  | 0.00  | 0.00  | 0.00  | 0.00  | 0.00  | 0.00  | 0.00  | 0.00  | 0.00 |
| Diseases of the respiratory system | 0.00                                         | 0.00 | 0.00 | 0.00 | 0.00  | 0.00  | 0.00  | 0.00  | 0.00  | 0.01  | 0.01  | 0.01  | 0.02  | 0.03  | 0.04  | 0.05  | 0.06  |      |
| Endocrine and metabolic diseases   | 0.00                                         | 0.00 | 0.00 | 0.00 | 0.00  | 0.00  | 0.00  | 0.00  | 0.00  | 0.00  | 0.00  | 0.00  | 0.01  | 0.01  | 0.02  | 0.03  | 0.04  |      |

| Country | Cause Group                                  | 0-1  | 1-4  | 5-9  | 10-14 | 15-19 | 20-24 | 25-29 | 30-34 | 35-39 | 40-44 | 45-49 | 50-54 | 55-59 | 60-64 | 65-69 | 70-74 |
|---------|----------------------------------------------|------|------|------|-------|-------|-------|-------|-------|-------|-------|-------|-------|-------|-------|-------|-------|
|         | Infectious diseases                          | 0.00 | 0.00 | 0.00 | 0.00  | 0.00  | 0.00  | 0.00  | 0.00  | 0.00  | 0.00  | 0.00  | 0.00  | 0.01  | 0.01  | 0.01  | 0.02  |
|         | Injuries                                     | 0.01 | 0.01 | 0.01 | 0.01  | 0.04  | 0.03  | 0.02  | 0.02  | 0.02  | 0.03  | 0.03  | 0.03  | 0.03  | 0.02  | 0.02  | 0.02  |
|         | Nonavoidable deaths                          | 0.00 | 0.00 | 0.00 | 0.00  | 0.00  | 0.00  | 0.00  | 0.00  | 0.00  | 0.00  | 0.00  | 0.00  | 0.00  | 0.00  | 0.00  | 0.00  |
|         | Pregnancy, childbirth and perinatal period   | 0.11 | 0.00 | 0.00 | 0.00  | 0.00  | 0.00  | 0.00  | 0.00  | 0.00  | 0.00  | 0.00  | 0.00  | 0.00  | 0.00  | 0.00  | 0.00  |
| Denmark | Adverse effects of medical and surgical care | 0.00 | 0.00 | 0.00 | 0.00  | 0.00  | 0.00  | 0.00  | 0.00  | 0.00  | 0.00  | 0.00  | 0.00  | 0.00  | 0.00  | 0.00  | 0.00  |
|         | Alcohol- related and drug related deaths     | 0.00 | 0.00 | 0.00 | 0.00  | 0.00  | 0.01  | 0.01  | 0.01  | 0.02  | 0.03  | 0.05  | 0.06  | 0.06  | 0.05  | 0.04  | 0.03  |
|         | Cancer                                       | 0.00 | 0.00 | 0.00 | 0.00  | 0.00  | 0.00  | 0.01  | 0.02  | 0.03  | 0.06  | 0.10  | 0.17  | 0.23  | 0.30  | 0.34  | 0.36  |
|         | Cardiovascular diseases                      | 0.00 | 0.00 | 0.00 | 0.00  | 0.00  | 0.00  | 0.00  | 0.00  | 0.00  | 0.01  | 0.01  | 0.02  | 0.03  | 0.05  | 0.07  | 0.11  |
|         | Cerebrovascular diseases                     | 0.00 | 0.00 | 0.00 | 0.00  | 0.00  | 0.00  | 0.00  | 0.00  | 0.01  | 0.01  | 0.01  | 0.02  | 0.02  | 0.03  | 0.05  | 0.07  |
|         | Congenital malformations                     | 0.02 | 0.00 | 0.00 | 0.00  | 0.00  | 0.00  | 0.00  | 0.00  | 0.00  | 0.00  | 0.00  | 0.00  | 0.00  | 0.00  | 0.00  | 0.00  |
|         | Diseases of the digestive system             | 0.00 | 0.00 | 0.00 | 0.00  | 0.00  | 0.00  | 0.00  | 0.00  | 0.00  | 0.00  | 0.00  | 0.00  | 0.01  | 0.01  | 0.01  | 0.01  |
|         | Diseases of the genitourinary system         | 0.00 | 0.00 | 0.00 | 0.00  | 0.00  | 0.00  | 0.00  | 0.00  | 0.00  | 0.00  | 0.00  | 0.00  | 0.00  | 0.00  | 0.01  | 0.01  |
|         | Diseases of the nervous system               | 0.00 | 0.00 | 0.00 | 0.00  | 0.00  | 0.00  | 0.00  | 0.00  | 0.00  | 0.00  | 0.00  | 0.00  | 0.00  | 0.00  | 0.00  | 0.00  |
|         | Diseases of the respiratory system           | 0.00 | 0.00 | 0.00 | 0.00  | 0.00  | 0.00  | 0.00  | 0.00  | 0.00  | 0.00  | 0.01  | 0.02  | 0.04  | 0.07  | 0.09  | 0.14  |
|         | Endocrine and metabolic diseases             | 0.00 | 0.00 | 0.00 | 0.00  | 0.00  | 0.00  | 0.00  | 0.00  | 0.00  | 0.00  | 0.00  | 0.01  | 0.01  | 0.02  | 0.02  | 0.03  |
|         | Infectious diseases                          | 0.00 | 0.00 | 0.00 | 0.00  | 0.00  | 0.00  | 0.00  | 0.00  | 0.00  | 0.00  | 0.00  | 0.00  | 0.01  | 0.01  | 0.01  | 0.01  |
|         | Injuries                                     | 0.00 | 0.01 | 0.01 | 0.01  | 0.02  | 0.02  | 0.02  | 0.01  | 0.01  | 0.02  | 0.02  | 0.02  | 0.01  | 0.02  | 0.01  | 0.02  |
|         | Nonavoidable deaths                          | 0.00 | 0.00 | 0.00 | 0.00  | 0.00  | 0.00  | 0.00  | 0.00  | 0.00  | 0.00  | 0.00  | 0.00  | 0.00  | 0.00  | 0.00  | 0.00  |
|         | Pregnancy, childbirth and perinatal period   | 0.14 | 0.00 | 0.00 | 0.00  | 0.00  | 0.00  | 0.00  | 0.00  | 0.00  | 0.00  | 0.00  | 0.00  | 0.00  | 0.00  | 0.00  | 0.00  |
| Estonia | Adverse effects of medical and surgical care | 0.00 | 0.00 | 0.00 | 0.00  | 0.00  | 0.00  | 0.00  | 0.00  | 0.00  | 0.00  | 0.00  | 0.00  | 0.00  | 0.00  | 0.00  | 0.00  |
|         | Alcohol- related and drug related deaths     | 0.00 | 0.00 | 0.00 | 0.00  | 0.01  | 0.03  | 0.04  | 0.05  | 0.05  | 0.06  | 0.08  | 0.10  | 0.10  | 0.08  | 0.05  | 0.03  |
|         | Cancer                                       | 0.00 | 0.00 | 0.00 | 0.00  | 0.01  | 0.00  | 0.01  | 0.02  | 0.04  | 0.07  | 0.11  | 0.16  | 0.19  | 0.24  | 0.24  | 0.24  |



| Country | Cause Group                                  | 0-1  | 1-4  | 5-9  | 10-14 | 15-19 | 20-24 | 25-29 | 30-34 | 35-39 | 40-44 | 45-49 | 50-54 | 55-59 | 60-64 | 65-69 | 70-74 |
|---------|----------------------------------------------|------|------|------|-------|-------|-------|-------|-------|-------|-------|-------|-------|-------|-------|-------|-------|
|         | Cardiovascular diseases                      | 0.00 | 0.00 | 0.00 | 0.00  | 0.00  | 0.00  | 0.00  | 0.00  | 0.01  | 0.02  | 0.03  | 0.07  | 0.12  | 0.19  | 0.29  | 0.45  |
|         | Cerebrovascular diseases                     | 0.00 | 0.00 | 0.00 | 0.00  | 0.00  | 0.00  | 0.00  | 0.01  | 0.01  | 0.01  | 0.02  | 0.03  | 0.04  | 0.06  | 0.09  | 0.12  |
|         | Congenital malformations                     | 0.03 | 0.01 | 0.00 | 0.00  | 0.00  | 0.00  | 0.00  | 0.00  | 0.00  | 0.00  | 0.00  | 0.00  | 0.00  | 0.00  | 0.00  | 0.00  |
|         | Diseases of the digestive system             | 0.00 | 0.00 | 0.00 | 0.00  | 0.00  | 0.00  | 0.00  | 0.00  | 0.00  | 0.00  | 0.00  | 0.01  | 0.01  | 0.01  | 0.01  | 0.01  |
|         | Diseases of the genitourinary system         | 0.00 | 0.00 | 0.00 | 0.00  | 0.00  | 0.00  | 0.00  | 0.00  | 0.00  | 0.00  | 0.00  | 0.00  | 0.00  | 0.00  | 0.00  | 0.00  |
|         | Diseases of the nervous system               | 0.00 | 0.00 | 0.00 | 0.00  | 0.00  | 0.00  | 0.00  | 0.00  | 0.00  | 0.00  | 0.01  | 0.00  | 0.00  | 0.00  | 0.00  | 0.00  |
|         | Diseases of the respiratory system           | 0.01 | 0.00 | 0.00 | 0.00  | 0.00  | 0.00  | 0.00  | 0.01  | 0.01  | 0.01  | 0.01  | 0.01  | 0.02  | 0.02  | 0.02  | 0.03  |
|         | Endocrine and metabolic diseases             | 0.00 | 0.00 | 0.00 | 0.00  | 0.00  | 0.00  | 0.00  | 0.00  | 0.00  | 0.00  | 0.01  | 0.01  | 0.01  | 0.02  | 0.02  | 0.02  |
|         | Infectious diseases                          | 0.00 | 0.00 | 0.00 | 0.00  | 0.00  | 0.01  | 0.02  | 0.01  | 0.01  | 0.01  | 0.01  | 0.01  | 0.01  | 0.01  | 0.00  | 0.01  |
|         | Injuries                                     | 0.02 | 0.03 | 0.01 | 0.03  | 0.05  | 0.04  | 0.03  | 0.04  | 0.03  | 0.04  | 0.04  | 0.05  | 0.05  | 0.04  | 0.03  | 0.02  |
|         | Nonavoidable deaths                          | 0.00 | 0.00 | 0.00 | 0.00  | 0.00  | 0.00  | 0.00  | 0.00  | 0.00  | 0.00  | 0.00  | 0.00  | 0.00  | 0.00  | 0.00  | 0.00  |
|         | Pregnancy, childbirth and perinatal period   | 0.11 | 0.00 | 0.00 | 0.00  | 0.00  | 0.00  | 0.00  | 0.00  | 0.00  | 0.00  | 0.00  | 0.00  | 0.00  | 0.00  | 0.00  | 0.00  |
| Finland | Adverse effects of medical and surgical care | 0.00 | 0.00 | 0.00 | 0.00  | 0.00  | 0.00  | 0.00  | 0.00  | 0.00  | 0.00  | 0.00  | 0.00  | 0.00  | 0.00  | 0.00  | 0.00  |
|         | Alcohol- related and drug related deaths     | 0.00 | 0.00 | 0.00 | 0.00  | 0.01  | 0.03  | 0.02  | 0.03  | 0.03  | 0.05  | 0.06  | 0.09  | 0.09  | 0.08  | 0.06  | 0.04  |
|         | Cancer                                       | 0.00 | 0.00 | 0.00 | 0.00  | 0.00  | 0.00  | 0.01  | 0.01  | 0.03  | 0.05  | 0.08  | 0.11  | 0.15  | 0.19  | 0.21  | 0.22  |
|         | Cardiovascular diseases                      | 0.00 | 0.00 | 0.00 | 0.00  | 0.00  | 0.00  | 0.00  | 0.00  | 0.00  | 0.01  | 0.02  | 0.03  | 0.05  | 0.07  | 0.12  | 0.18  |
|         | Cerebrovascular diseases                     | 0.00 | 0.00 | 0.00 | 0.00  | 0.00  | 0.00  | 0.00  | 0.00  | 0.01  | 0.01  | 0.01  | 0.02  | 0.03  | 0.03  | 0.05  | 0.08  |
|         | Congenital malformations                     | 0.02 | 0.00 | 0.00 | 0.00  | 0.00  | 0.00  | 0.00  | 0.00  | 0.00  | 0.00  | 0.00  | 0.00  | 0.00  | 0.00  | 0.00  | 0.00  |
|         | Diseases of the digestive system             | 0.00 | 0.00 | 0.00 | 0.00  | 0.00  | 0.00  | 0.00  | 0.00  | 0.00  | 0.00  | 0.00  | 0.01  | 0.01  | 0.01  | 0.01  | 0.01  |
|         | Diseases of the genitourinary system         | 0.00 | 0.00 | 0.00 | 0.00  | 0.00  | 0.00  | 0.00  | 0.00  | 0.00  | 0.00  | 0.00  | 0.00  | 0.00  | 0.00  | 0.00  | 0.00  |
|         | Diseases of the nervous system               | 0.00 | 0.00 | 0.00 | 0.00  | 0.00  | 0.00  | 0.00  | 0.00  | 0.00  | 0.00  | 0.00  | 0.00  | 0.00  | 0.00  | 0.00  | 0.00  |
|         | Diseases of the respiratory system           | 0.00 | 0.00 | 0.00 | 0.00  | 0.00  | 0.00  | 0.00  | 0.00  | 0.00  | 0.00  | 0.01  | 0.01  | 0.01  | 0.02  | 0.03  | 0.04  |

| Country                                      | Cause Group                                  | 0-1  | 1-4  | 5-9  | 10-14 | 15-19 | 20-24 | 25-29 | 30-34 | 35-39 | 40-44 | 45-49 | 50-54 | 55-59 | 60-64 | 65-69 | 70-74 |      |
|----------------------------------------------|----------------------------------------------|------|------|------|-------|-------|-------|-------|-------|-------|-------|-------|-------|-------|-------|-------|-------|------|
| France                                       | Endocrine and metabolic diseases             | 0-00 | 0-00 | 0-00 | 0-00  | 0-00  | 0-00  | 0-00  | 0-00  | 0-00  | 0-00  | 0-01  | 0-01  | 0-01  | 0-01  | 0-01  | 0-01  |      |
|                                              | Infectious diseases                          | 0-00 | 0-00 | 0-00 | 0-00  | 0-00  | 0-00  | 0-00  | 0-00  | 0-00  | 0-00  | 0-00  | 0-00  | 0-00  | 0-00  | 0-00  | 0-00  | 0-01 |
|                                              | Injuries                                     | 0-00 | 0-01 | 0-01 | 0-01  | 0-04  | 0-04  | 0-03  | 0-02  | 0-02  | 0-02  | 0-02  | 0-02  | 0-03  | 0-03  | 0-03  | 0-03  | 0-03 |
|                                              | Nonavoidable deaths                          | 0-00 | 0-00 | 0-00 | 0-00  | 0-00  | 0-00  | 0-00  | 0-00  | 0-00  | 0-00  | 0-00  | 0-00  | 0-00  | 0-00  | 0-00  | 0-00  | 0-00 |
|                                              | Pregnancy, childbirth and perinatal period   | 0-08 | 0-00 | 0-00 | 0-00  | 0-00  | 0-00  | 0-00  | 0-00  | 0-00  | 0-00  | 0-00  | 0-00  | 0-00  | 0-00  | 0-00  | 0-00  | 0-00 |
|                                              | Adverse effects of medical and surgical care | 0-00 | 0-00 | 0-00 | 0-00  | 0-00  | 0-00  | 0-00  | 0-00  | 0-00  | 0-00  | 0-00  | 0-00  | 0-00  | 0-00  | 0-00  | 0-00  | 0-00 |
|                                              | Alcohol- related and drug related deaths     | 0-00 | 0-00 | 0-00 | 0-00  | 0-00  | 0-00  | 0-00  | 0-00  | 0-01  | 0-01  | 0-02  | 0-03  | 0-04  | 0-04  | 0-03  | 0-02  | 0-02 |
|                                              | Cancer                                       | 0-00 | 0-00 | 0-00 | 0-00  | 0-00  | 0-00  | 0-01  | 0-02  | 0-04  | 0-08  | 0-12  | 0-17  | 0-21  | 0-22  | 0-23  | 0-23  | 0-23 |
|                                              | Cardiovascular diseases                      | 0-00 | 0-00 | 0-00 | 0-00  | 0-00  | 0-00  | 0-00  | 0-00  | 0-00  | 0-01  | 0-01  | 0-02  | 0-02  | 0-03  | 0-04  | 0-04  | 0-07 |
|                                              | Cerebrovascular diseases                     | 0-00 | 0-00 | 0-00 | 0-00  | 0-00  | 0-00  | 0-00  | 0-00  | 0-00  | 0-01  | 0-01  | 0-01  | 0-02  | 0-02  | 0-03  | 0-03  | 0-05 |
|                                              | Congenital malformations                     | 0-03 | 0-00 | 0-00 | 0-00  | 0-00  | 0-00  | 0-00  | 0-00  | 0-00  | 0-00  | 0-00  | 0-00  | 0-00  | 0-00  | 0-00  | 0-00  | 0-00 |
|                                              | Diseases of the digestive system             | 0-00 | 0-00 | 0-00 | 0-00  | 0-00  | 0-00  | 0-00  | 0-00  | 0-00  | 0-00  | 0-00  | 0-00  | 0-00  | 0-00  | 0-00  | 0-00  | 0-01 |
|                                              | Diseases of the genitourinary system         | 0-00 | 0-00 | 0-00 | 0-00  | 0-00  | 0-00  | 0-00  | 0-00  | 0-00  | 0-00  | 0-00  | 0-00  | 0-00  | 0-00  | 0-00  | 0-00  | 0-01 |
|                                              | Diseases of the nervous system               | 0-00 | 0-00 | 0-00 | 0-00  | 0-00  | 0-00  | 0-00  | 0-00  | 0-00  | 0-00  | 0-00  | 0-00  | 0-00  | 0-00  | 0-00  | 0-00  | 0-00 |
|                                              | Diseases of the respiratory system           | 0-00 | 0-00 | 0-00 | 0-00  | 0-00  | 0-00  | 0-00  | 0-00  | 0-00  | 0-00  | 0-01  | 0-01  | 0-01  | 0-02  | 0-02  | 0-02  | 0-03 |
|                                              | Endocrine and metabolic diseases             | 0-00 | 0-00 | 0-00 | 0-00  | 0-00  | 0-00  | 0-00  | 0-00  | 0-00  | 0-00  | 0-00  | 0-00  | 0-01  | 0-01  | 0-02  | 0-02  | 0-02 |
|                                              | Infectious diseases                          | 0-01 | 0-00 | 0-00 | 0-00  | 0-00  | 0-00  | 0-00  | 0-00  | 0-00  | 0-00  | 0-01  | 0-01  | 0-01  | 0-01  | 0-01  | 0-01  | 0-01 |
|                                              | Injuries                                     | 0-01 | 0-01 | 0-01 | 0-01  | 0-03  | 0-03  | 0-02  | 0-02  | 0-03  | 0-03  | 0-03  | 0-03  | 0-03  | 0-03  | 0-03  | 0-03  | 0-03 |
|                                              | Nonavoidable deaths                          | 0-00 | 0-00 | 0-00 | 0-00  | 0-00  | 0-00  | 0-00  | 0-00  | 0-00  | 0-00  | 0-00  | 0-00  | 0-00  | 0-00  | 0-00  | 0-00  | 0-00 |
| Pregnancy, childbirth and perinatal period   | 0-14                                         | 0-00 | 0-00 | 0-00 | 0-00  | 0-00  | 0-00  | 0-00  | 0-00  | 0-00  | 0-00  | 0-00  | 0-00  | 0-00  | 0-00  | 0-00  | 0-00  |      |
| Adverse effects of medical and surgical care | 0-00                                         | 0-00 | 0-00 | 0-00 | 0-00  | 0-00  | 0-00  | 0-00  | 0-00  | 0-00  | 0-00  | 0-00  | 0-00  | 0-00  | 0-00  | 0-00  | 0-00  |      |
| Alcohol- related and drug related deaths     | 0-00                                         | 0-00 | 0-00 | 0-00 | 0-00  | 0-00  | 0-01  | 0-01  | 0-01  | 0-02  | 0-03  | 0-04  | 0-04  | 0-04  | 0-04  | 0-03  | 0-02  |      |
| Germany                                      |                                              |      |      |      |       |       |       |       |       |       |       |       |       |       |       |       |       |      |

| Country | Cause Group                                  | 0-1  | 1-4  | 5-9  | 10-14 | 15-19 | 20-24 | 25-29 | 30-34 | 35-39 | 40-44 | 45-49 | 50-54 | 55-59 | 60-64 | 65-69 | 70-74 |
|---------|----------------------------------------------|------|------|------|-------|-------|-------|-------|-------|-------|-------|-------|-------|-------|-------|-------|-------|
|         | Cancer                                       | 0.00 | 0.00 | 0.00 | 0.00  | 0.00  | 0.00  | 0.01  | 0.02  | 0.03  | 0.06  | 0.10  | 0.15  | 0.20  | 0.24  | 0.25  | 0.24  |
|         | Cardiovascular diseases                      | 0.00 | 0.00 | 0.00 | 0.00  | 0.00  | 0.00  | 0.00  | 0.00  | 0.01  | 0.01  | 0.02  | 0.03  | 0.05  | 0.07  | 0.11  | 0.16  |
|         | Cerebrovascular diseases                     | 0.00 | 0.00 | 0.00 | 0.00  | 0.00  | 0.00  | 0.00  | 0.00  | 0.00  | 0.01  | 0.01  | 0.02  | 0.02  | 0.02  | 0.04  | 0.06  |
|         | Congenital malformations                     | 0.03 | 0.00 | 0.00 | 0.00  | 0.00  | 0.00  | 0.00  | 0.00  | 0.00  | 0.00  | 0.00  | 0.00  | 0.00  | 0.00  | 0.00  | 0.00  |
|         | Diseases of the digestive system             | 0.00 | 0.00 | 0.00 | 0.00  | 0.00  | 0.00  | 0.00  | 0.00  | 0.00  | 0.00  | 0.00  | 0.00  | 0.00  | 0.00  | 0.01  | 0.01  |
|         | Diseases of the genitourinary system         | 0.00 | 0.00 | 0.00 | 0.00  | 0.00  | 0.00  | 0.00  | 0.00  | 0.00  | 0.00  | 0.00  | 0.00  | 0.00  | 0.01  | 0.01  | 0.01  |
|         | Diseases of the nervous system               | 0.00 | 0.00 | 0.00 | 0.00  | 0.00  | 0.00  | 0.00  | 0.00  | 0.00  | 0.00  | 0.00  | 0.00  | 0.00  | 0.00  | 0.00  | 0.00  |
|         | Diseases of the respiratory system           | 0.00 | 0.00 | 0.00 | 0.00  | 0.00  | 0.00  | 0.00  | 0.00  | 0.00  | 0.00  | 0.01  | 0.01  | 0.03  | 0.04  | 0.05  | 0.07  |
|         | Endocrine and metabolic diseases             | 0.00 | 0.00 | 0.00 | 0.00  | 0.00  | 0.00  | 0.00  | 0.00  | 0.00  | 0.00  | 0.00  | 0.01  | 0.01  | 0.01  | 0.02  | 0.03  |
|         | Infectious diseases                          | 0.00 | 0.00 | 0.00 | 0.00  | 0.00  | 0.00  | 0.00  | 0.00  | 0.00  | 0.00  | 0.00  | 0.01  | 0.01  | 0.01  | 0.01  | 0.02  |
|         | Injuries                                     | 0.00 | 0.01 | 0.01 | 0.01  | 0.02  | 0.02  | 0.02  | 0.02  | 0.01  | 0.02  | 0.02  | 0.02  | 0.02  | 0.02  | 0.02  | 0.02  |
|         | Nonavoidable deaths                          | 0.00 | 0.00 | 0.00 | 0.00  | 0.00  | 0.00  | 0.00  | 0.00  | 0.00  | 0.00  | 0.00  | 0.00  | 0.00  | 0.00  | 0.00  | 0.00  |
|         | Pregnancy, childbirth and perinatal period   | 0.13 | 0.00 | 0.00 | 0.00  | 0.00  | 0.00  | 0.00  | 0.00  | 0.00  | 0.00  | 0.00  | 0.00  | 0.00  | 0.00  | 0.00  | 0.00  |
| Hungary | Adverse effects of medical and surgical care | 0.00 | 0.00 | 0.00 | 0.00  | 0.00  | 0.00  | 0.00  | 0.00  | 0.00  | 0.00  | 0.00  | 0.00  | 0.00  | 0.00  | 0.00  | 0.00  |
|         | Alcohol- related and drug related deaths     | 0.00 | 0.00 | 0.00 | 0.00  | 0.00  | 0.00  | 0.00  | 0.01  | 0.02  | 0.03  | 0.06  | 0.07  | 0.08  | 0.07  | 0.05  | 0.03  |
|         | Cancer                                       | 0.00 | 0.00 | 0.00 | 0.00  | 0.00  | 0.00  | 0.01  | 0.03  | 0.05  | 0.09  | 0.17  | 0.26  | 0.32  | 0.35  | 0.33  | 0.29  |
|         | Cardiovascular diseases                      | 0.00 | 0.00 | 0.00 | 0.00  | 0.00  | 0.00  | 0.00  | 0.01  | 0.01  | 0.03  | 0.06  | 0.10  | 0.15  | 0.21  | 0.30  | 0.42  |
|         | Cerebrovascular diseases                     | 0.00 | 0.00 | 0.00 | 0.00  | 0.00  | 0.00  | 0.00  | 0.00  | 0.01  | 0.02  | 0.03  | 0.04  | 0.05  | 0.07  | 0.10  | 0.14  |
|         | Congenital malformations                     | 0.05 | 0.00 | 0.00 | 0.00  | 0.00  | 0.00  | 0.00  | 0.00  | 0.00  | 0.00  | 0.00  | 0.00  | 0.00  | 0.00  | 0.00  | 0.00  |
|         | Diseases of the digestive system             | 0.00 | 0.00 | 0.00 | 0.00  | 0.00  | 0.00  | 0.00  | 0.00  | 0.00  | 0.00  | 0.01  | 0.01  | 0.01  | 0.01  | 0.02  | 0.02  |
|         | Diseases of the genitourinary system         | 0.00 | 0.00 | 0.00 | 0.00  | 0.00  | 0.00  | 0.00  | 0.00  | 0.00  | 0.00  | 0.00  | 0.00  | 0.00  | 0.00  | 0.01  | 0.01  |
|         | Diseases of the nervous system               | 0.00 | 0.00 | 0.00 | 0.00  | 0.00  | 0.00  | 0.00  | 0.00  | 0.00  | 0.00  | 0.00  | 0.00  | 0.00  | 0.00  | 0.00  | 0.00  |

| Country | Cause Group                                  | 0-1  | 1-4  | 5-9  | 10-14 | 15-19 | 20-24 | 25-29 | 30-34 | 35-39 | 40-44 | 45-49 | 50-54 | 55-59 | 60-64 | 65-69 | 70-74 |
|---------|----------------------------------------------|------|------|------|-------|-------|-------|-------|-------|-------|-------|-------|-------|-------|-------|-------|-------|
|         | Diseases of the respiratory system           | 0.01 | 0.00 | 0.00 | 0.00  | 0.00  | 0.00  | 0.00  | 0.00  | 0.01  | 0.01  | 0.02  | 0.04  | 0.05  | 0.06  | 0.07  | 0.07  |
|         | Endocrine and metabolic diseases             | 0.00 | 0.00 | 0.00 | 0.00  | 0.00  | 0.00  | 0.00  | 0.00  | 0.00  | 0.00  | 0.01  | 0.01  | 0.02  | 0.03  | 0.04  | 0.05  |
|         | Infectious diseases                          | 0.00 | 0.00 | 0.00 | 0.00  | 0.00  | 0.00  | 0.00  | 0.00  | 0.00  | 0.00  | 0.00  | 0.01  | 0.01  | 0.01  | 0.01  | 0.01  |
|         | Injuries                                     | 0.01 | 0.01 | 0.01 | 0.01  | 0.03  | 0.03  | 0.02  | 0.02  | 0.03  | 0.03  | 0.04  | 0.04  | 0.03  | 0.03  | 0.03  | 0.03  |
|         | Nonavoidable deaths                          | 0.00 | 0.00 | 0.00 | 0.00  | 0.00  | 0.00  | 0.00  | 0.00  | 0.00  | 0.00  | 0.00  | 0.00  | 0.00  | 0.00  | 0.00  | 0.00  |
|         | Pregnancy, childbirth and perinatal period   | 0.21 | 0.00 | 0.00 | 0.00  | 0.00  | 0.00  | 0.00  | 0.00  | 0.00  | 0.00  | 0.00  | 0.00  | 0.00  | 0.00  | 0.00  | 0.00  |
| Ireland | Adverse effects of medical and surgical care | 0.00 | 0.00 | 0.00 | 0.00  | 0.00  | 0.00  | 0.00  | 0.00  | 0.00  | 0.00  | 0.00  | 0.00  | 0.00  | 0.00  | 0.00  | 0.00  |
|         | Alcohol- related and drug related deaths     | 0.00 | 0.00 | 0.00 | 0.00  | 0.00  | 0.01  | 0.01  | 0.02  | 0.02  | 0.02  | 0.03  | 0.03  | 0.03  | 0.03  | 0.02  | 0.01  |
|         | Cancer                                       | 0.00 | 0.00 | 0.00 | 0.00  | 0.00  | 0.00  | 0.01  | 0.02  | 0.04  | 0.07  | 0.11  | 0.15  | 0.21  | 0.26  | 0.29  | 0.33  |
|         | Cardiovascular diseases                      | 0.00 | 0.00 | 0.00 | 0.00  | 0.00  | 0.00  | 0.00  | 0.01  | 0.01  | 0.01  | 0.02  | 0.03  | 0.04  | 0.07  | 0.10  | 0.15  |
|         | Cerebrovascular diseases                     | 0.00 | 0.00 | 0.00 | 0.00  | 0.00  | 0.00  | 0.00  | 0.00  | 0.00  | 0.01  | 0.01  | 0.02  | 0.02  | 0.02  | 0.04  | 0.06  |
|         | Congenital malformations                     | 0.04 | 0.00 | 0.00 | 0.00  | 0.00  | 0.00  | 0.00  | 0.00  | 0.00  | 0.00  | 0.00  | 0.00  | 0.00  | 0.00  | 0.00  | 0.00  |
|         | Diseases of the digestive system             | 0.00 | 0.00 | 0.00 | 0.00  | 0.00  | 0.00  | 0.00  | 0.00  | 0.00  | 0.00  | 0.00  | 0.00  | 0.00  | 0.00  | 0.01  | 0.01  |
|         | Diseases of the genitourinary system         | 0.00 | 0.00 | 0.00 | 0.00  | 0.00  | 0.00  | 0.00  | 0.00  | 0.00  | 0.00  | 0.00  | 0.00  | 0.00  | 0.00  | 0.01  | 0.01  |
|         | Diseases of the nervous system               | 0.00 | 0.00 | 0.00 | 0.00  | 0.00  | 0.00  | 0.00  | 0.00  | 0.00  | 0.00  | 0.00  | 0.00  | 0.00  | 0.00  | 0.00  | 0.00  |
|         | Diseases of the respiratory system           | 0.00 | 0.00 | 0.00 | 0.00  | 0.00  | 0.00  | 0.00  | 0.00  | 0.00  | 0.00  | 0.01  | 0.01  | 0.03  | 0.04  | 0.07  | 0.11  |
|         | Endocrine and metabolic diseases             | 0.00 | 0.00 | 0.00 | 0.00  | 0.00  | 0.00  | 0.00  | 0.00  | 0.00  | 0.00  | 0.00  | 0.00  | 0.01  | 0.01  | 0.01  | 0.02  |
|         | Infectious diseases                          | 0.00 | 0.00 | 0.00 | 0.00  | 0.00  | 0.00  | 0.00  | 0.00  | 0.00  | 0.00  | 0.00  | 0.00  | 0.00  | 0.00  | 0.00  | 0.01  |
|         | Injuries                                     | 0.00 | 0.01 | 0.00 | 0.01  | 0.03  | 0.03  | 0.02  | 0.02  | 0.02  | 0.02  | 0.02  | 0.02  | 0.02  | 0.01  | 0.02  | 0.02  |
|         | Nonavoidable deaths                          | 0.00 | 0.00 | 0.00 | 0.00  | 0.00  | 0.00  | 0.00  | 0.00  | 0.00  | 0.00  | 0.00  | 0.00  | 0.00  | 0.00  | 0.00  | 0.00  |
|         | Pregnancy, childbirth and perinatal period   | 0.11 | 0.00 | 0.00 | 0.00  | 0.00  | 0.00  | 0.00  | 0.00  | 0.00  | 0.00  | 0.00  | 0.00  | 0.00  | 0.00  | 0.00  | 0.00  |
| Italy   | Adverse effects of medical and surgical care | 0.00 | 0.00 | 0.00 | 0.00  | 0.00  | 0.00  | 0.00  | 0.00  | 0.00  | 0.00  | 0.00  | 0.00  | 0.00  | 0.00  | 0.00  | 0.00  |

| Country | Cause Group                                  | 0-1  | 1-4  | 5-9  | 10-14 | 15-19 | 20-24 | 25-29 | 30-34 | 35-39 | 40-44 | 45-49 | 50-54 | 55-59 | 60-64 | 65-69 | 70-74 |
|---------|----------------------------------------------|------|------|------|-------|-------|-------|-------|-------|-------|-------|-------|-------|-------|-------|-------|-------|
|         | Alcohol- related and drug related deaths     | 0·00 | 0·00 | 0·00 | 0·00  | 0·00  | 0·00  | 0·00  | 0·00  | 0·00  | 0·01  | 0·01  | 0·01  | 0·01  | 0·01  | 0·01  | 0·02  |
|         | Cancer                                       | 0·00 | 0·00 | 0·00 | 0·00  | 0·00  | 0·00  | 0·01  | 0·02  | 0·04  | 0·06  | 0·10  | 0·14  | 0·18  | 0·21  | 0·24  | 0·24  |
|         | Cardiovascular diseases                      | 0·00 | 0·00 | 0·00 | 0·00  | 0·00  | 0·00  | 0·00  | 0·00  | 0·00  | 0·01  | 0·01  | 0·02  | 0·03  | 0·05  | 0·08  | 0·12  |
|         | Cerebrovascular diseases                     | 0·00 | 0·00 | 0·00 | 0·00  | 0·00  | 0·00  | 0·00  | 0·00  | 0·00  | 0·01  | 0·01  | 0·01  | 0·02  | 0·02  | 0·04  | 0·07  |
|         | Congenital malformations                     | 0·03 | 0·00 | 0·00 | 0·00  | 0·00  | 0·00  | 0·00  | 0·00  | 0·00  | 0·00  | 0·00  | 0·00  | 0·00  | 0·00  | 0·00  | 0·00  |
|         | Diseases of the digestive system             | 0·00 | 0·00 | 0·00 | 0·00  | 0·00  | 0·00  | 0·00  | 0·00  | 0·00  | 0·00  | 0·00  | 0·00  | 0·00  | 0·00  | 0·00  | 0·01  |
|         | Diseases of the genitourinary system         | 0·00 | 0·00 | 0·00 | 0·00  | 0·00  | 0·00  | 0·00  | 0·00  | 0·00  | 0·00  | 0·00  | 0·00  | 0·00  | 0·00  | 0·01  | 0·01  |
|         | Diseases of the nervous system               | 0·00 | 0·00 | 0·00 | 0·00  | 0·00  | 0·00  | 0·00  | 0·00  | 0·00  | 0·00  | 0·00  | 0·00  | 0·00  | 0·00  | 0·00  | 0·00  |
|         | Diseases of the respiratory system           | 0·00 | 0·00 | 0·00 | 0·00  | 0·00  | 0·00  | 0·00  | 0·00  | 0·00  | 0·00  | 0·00  | 0·01  | 0·01  | 0·01  | 0·02  | 0·03  |
|         | Endocrine and metabolic diseases             | 0·00 | 0·00 | 0·00 | 0·00  | 0·00  | 0·00  | 0·00  | 0·00  | 0·00  | 0·00  | 0·00  | 0·01  | 0·01  | 0·02  | 0·03  | 0·04  |
|         | Infectious diseases                          | 0·00 | 0·00 | 0·00 | 0·00  | 0·00  | 0·00  | 0·00  | 0·00  | 0·00  | 0·01  | 0·01  | 0·01  | 0·01  | 0·01  | 0·01  | 0·02  |
|         | Injuries                                     | 0·00 | 0·01 | 0·00 | 0·01  | 0·02  | 0·03  | 0·02  | 0·02  | 0·01  | 0·01  | 0·01  | 0·01  | 0·01  | 0·01  | 0·01  | 0·02  |
|         | Nonavoidable deaths                          | 0·00 | 0·00 | 0·00 | 0·00  | 0·00  | 0·00  | 0·00  | 0·00  | 0·00  | 0·00  | 0·00  | 0·00  | 0·00  | 0·00  | 0·00  | 0·00  |
|         | Pregnancy, childbirth and perinatal period   | 0·14 | 0·00 | 0·00 | 0·00  | 0·00  | 0·00  | 0·00  | 0·00  | 0·00  | 0·00  | 0·00  | 0·00  | 0·00  | 0·00  | 0·00  | 0·00  |
| Latvia  | Adverse effects of medical and surgical care | 0·00 | 0·00 | 0·00 | 0·00  | 0·00  | 0·00  | 0·00  | 0·00  | 0·00  | 0·00  | 0·00  | 0·00  | 0·00  | 0·00  | 0·00  | 0·00  |
|         | Alcohol- related and drug related deaths     | 0·00 | 0·00 | 0·00 | 0·00  | 0·01  | 0·01  | 0·01  | 0·03  | 0·05  | 0·07  | 0·08  | 0·09  | 0·08  | 0·07  | 0·04  | 0·02  |
|         | Cancer                                       | 0·00 | 0·00 | 0·00 | 0·00  | 0·00  | 0·01  | 0·01  | 0·03  | 0·06  | 0·09  | 0·13  | 0·16  | 0·21  | 0·23  | 0·23  | 0·22  |
|         | Cardiovascular diseases                      | 0·00 | 0·00 | 0·00 | 0·00  | 0·00  | 0·00  | 0·00  | 0·00  | 0·01  | 0·03  | 0·05  | 0·09  | 0·16  | 0·24  | 0·33  | 0·44  |
|         | Cerebrovascular diseases                     | 0·00 | 0·00 | 0·00 | 0·00  | 0·00  | 0·00  | 0·00  | 0·00  | 0·01  | 0·02  | 0·03  | 0·05  | 0·07  | 0·12  | 0·18  | 0·26  |
|         | Congenital malformations                     | 0·04 | 0·00 | 0·00 | 0·00  | 0·00  | 0·00  | 0·00  | 0·00  | 0·00  | 0·00  | 0·00  | 0·00  | 0·00  | 0·00  | 0·00  | 0·00  |
|         | Diseases of the digestive system             | 0·00 | 0·00 | 0·00 | 0·00  | 0·00  | 0·00  | 0·00  | 0·00  | 0·00  | 0·01  | 0·01  | 0·01  | 0·01  | 0·01  | 0·01  | 0·01  |
|         | Diseases of the genitourinary system         | 0·00 | 0·00 | 0·00 | 0·00  | 0·00  | 0·00  | 0·00  | 0·00  | 0·00  | 0·00  | 0·00  | 0·00  | 0·00  | 0·01  | 0·01  | 0·01  |

| Country                                    | Cause Group                                  | 0-1  | 1-4  | 5-9  | 10-14 | 15-19 | 20-24 | 25-29 | 30-34 | 35-39 | 40-44 | 45-49 | 50-54 | 55-59 | 60-64 | 65-69 | 70-74 |
|--------------------------------------------|----------------------------------------------|------|------|------|-------|-------|-------|-------|-------|-------|-------|-------|-------|-------|-------|-------|-------|
| Lithuania                                  | Diseases of the nervous system               | 0.00 | 0.00 | 0.00 | 0.00  | 0.00  | 0.00  | 0.01  | 0.00  | 0.00  | 0.00  | 0.00  | 0.00  | 0.00  | 0.00  | 0.00  | 0.00  |
|                                            | Diseases of the respiratory system           | 0.01 | 0.00 | 0.00 | 0.00  | 0.00  | 0.00  | 0.01  | 0.01  | 0.01  | 0.02  | 0.02  | 0.02  | 0.02  | 0.03  | 0.02  | 0.02  |
|                                            | Endocrine and metabolic diseases             | 0.00 | 0.00 | 0.00 | 0.00  | 0.00  | 0.00  | 0.00  | 0.00  | 0.00  | 0.01  | 0.01  | 0.01  | 0.02  | 0.02  | 0.03  | 0.04  |
|                                            | Infectious diseases                          | 0.01 | 0.00 | 0.00 | 0.00  | 0.00  | 0.00  | 0.01  | 0.02  | 0.02  | 0.02  | 0.02  | 0.01  | 0.01  | 0.01  | 0.01  | 0.01  |
|                                            | Injuries                                     | 0.02 | 0.03 | 0.02 | 0.02  | 0.05  | 0.04  | 0.04  | 0.05  | 0.05  | 0.06  | 0.06  | 0.06  | 0.06  | 0.05  | 0.04  | 0.03  |
|                                            | Nonavoidable deaths                          | 0.00 | 0.00 | 0.00 | 0.00  | 0.00  | 0.00  | 0.00  | 0.00  | 0.00  | 0.00  | 0.00  | 0.00  | 0.00  | 0.00  | 0.00  | 0.00  |
|                                            | Pregnancy, childbirth and perinatal period   | 0.22 | 0.00 | 0.00 | 0.00  | 0.00  | 0.00  | 0.00  | 0.00  | 0.00  | 0.00  | 0.00  | 0.00  | 0.00  | 0.00  | 0.00  | 0.00  |
|                                            | Adverse effects of medical and surgical care | 0.00 | 0.00 | 0.00 | 0.00  | 0.00  | 0.00  | 0.00  | 0.00  | 0.00  | 0.00  | 0.00  | 0.00  | 0.00  | 0.00  | 0.00  | 0.00  |
|                                            | Alcohol- related and drug related deaths     | 0.00 | 0.00 | 0.00 | 0.00  | 0.00  | 0.01  | 0.02  | 0.04  | 0.05  | 0.06  | 0.08  | 0.08  | 0.09  | 0.08  | 0.04  | 0.02  |
|                                            | Cancer                                       | 0.00 | 0.00 | 0.00 | 0.00  | 0.00  | 0.00  | 0.01  | 0.03  | 0.06  | 0.09  | 0.13  | 0.17  | 0.20  | 0.21  | 0.22  | 0.20  |
|                                            | Cardiovascular diseases                      | 0.00 | 0.00 | 0.00 | 0.00  | 0.00  | 0.00  | 0.01  | 0.01  | 0.02  | 0.03  | 0.05  | 0.09  | 0.15  | 0.23  | 0.33  | 0.44  |
|                                            | Cerebrovascular diseases                     | 0.00 | 0.00 | 0.00 | 0.00  | 0.00  | 0.00  | 0.00  | 0.01  | 0.01  | 0.02  | 0.03  | 0.04  | 0.06  | 0.09  | 0.14  | 0.21  |
|                                            | Congenital malformations                     | 0.05 | 0.01 | 0.00 | 0.00  | 0.00  | 0.00  | 0.00  | 0.00  | 0.00  | 0.00  | 0.00  | 0.00  | 0.00  | 0.00  | 0.00  | 0.00  |
|                                            | Diseases of the digestive system             | 0.00 | 0.00 | 0.00 | 0.00  | 0.00  | 0.00  | 0.00  | 0.00  | 0.01  | 0.01  | 0.01  | 0.01  | 0.01  | 0.01  | 0.02  | 0.02  |
|                                            | Diseases of the genitourinary system         | 0.00 | 0.00 | 0.00 | 0.00  | 0.00  | 0.00  | 0.00  | 0.00  | 0.00  | 0.00  | 0.00  | 0.00  | 0.00  | 0.00  | 0.01  | 0.01  |
|                                            | Diseases of the nervous system               | 0.00 | 0.00 | 0.00 | 0.00  | 0.00  | 0.00  | 0.00  | 0.00  | 0.00  | 0.00  | 0.00  | 0.00  | 0.00  | 0.00  | 0.00  | 0.00  |
|                                            | Diseases of the respiratory system           | 0.02 | 0.00 | 0.00 | 0.00  | 0.00  | 0.00  | 0.00  | 0.01  | 0.01  | 0.01  | 0.01  | 0.02  | 0.02  | 0.02  | 0.03  | 0.03  |
|                                            | Endocrine and metabolic diseases             | 0.00 | 0.00 | 0.00 | 0.00  | 0.00  | 0.00  | 0.00  | 0.00  | 0.00  | 0.00  | 0.01  | 0.00  | 0.01  | 0.02  | 0.02  | 0.02  |
|                                            | Infectious diseases                          | 0.01 | 0.01 | 0.00 | 0.00  | 0.00  | 0.00  | 0.01  | 0.01  | 0.01  | 0.01  | 0.02  | 0.01  | 0.01  | 0.01  | 0.02  | 0.02  |
|                                            | Injuries                                     | 0.02 | 0.02 | 0.02 | 0.03  | 0.06  | 0.05  | 0.05  | 0.05  | 0.06  | 0.08  | 0.08  | 0.09  | 0.08  | 0.06  | 0.05  | 0.04  |
| Nonavoidable deaths                        | 0.00                                         | 0.00 | 0.00 | 0.00 | 0.00  | 0.00  | 0.00  | 0.00  | 0.00  | 0.00  | 0.00  | 0.00  | 0.00  | 0.00  | 0.00  | 0.00  |       |
| Pregnancy, childbirth and perinatal period | 0.14                                         | 0.00 | 0.00 | 0.00 | 0.00  | 0.00  | 0.00  | 0.00  | 0.00  | 0.00  | 0.00  | 0.00  | 0.00  | 0.00  | 0.00  | 0.00  |       |

| Country                                    | Cause Group                                  | 0-1  | 1-4  | 5-9  | 10-14 | 15-19 | 20-24 | 25-29 | 30-34 | 35-39 | 40-44 | 45-49 | 50-54 | 55-59 | 60-64 | 65-69 | 70-74 |      |
|--------------------------------------------|----------------------------------------------|------|------|------|-------|-------|-------|-------|-------|-------|-------|-------|-------|-------|-------|-------|-------|------|
| Luxembourg                                 | Adverse effects of medical and surgical care | 0-00 | 0-00 | 0-00 | 0-00  | 0-00  | 0-00  | 0-00  | 0-00  | 0-00  | 0-00  | 0-00  | 0-00  | 0-00  | 0-00  | 0-00  | 0-00  |      |
|                                            | Alcohol- related and drug related deaths     | 0-00 | 0-00 | 0-00 | 0-00  | 0-00  | 0-00  | 0-00  | 0-01  | 0-01  | 0-01  | 0-02  | 0-04  | 0-04  | 0-04  | 0-03  | 0-04  | 0-03 |
|                                            | Cancer                                       | 0-00 | 0-00 | 0-00 | 0-00  | 0-00  | 0-00  | 0-00  | 0-01  | 0-01  | 0-03  | 0-05  | 0-09  | 0-13  | 0-18  | 0-24  | 0-24  | 0-25 |
|                                            | Cardiovascular diseases                      | 0-00 | 0-00 | 0-00 | 0-00  | 0-00  | 0-00  | 0-00  | 0-00  | 0-01  | 0-01  | 0-02  | 0-03  | 0-04  | 0-04  | 0-06  | 0-09  | 0-11 |
|                                            | Cerebrovascular diseases                     | 0-00 | 0-00 | 0-00 | 0-00  | 0-00  | 0-00  | 0-00  | 0-00  | 0-00  | 0-01  | 0-01  | 0-02  | 0-02  | 0-03  | 0-03  | 0-03  | 0-07 |
|                                            | Congenital malformations                     | 0-01 | 0-00 | 0-00 | 0-00  | 0-00  | 0-00  | 0-00  | 0-00  | 0-00  | 0-00  | 0-00  | 0-00  | 0-00  | 0-00  | 0-00  | 0-00  | 0-00 |
|                                            | Diseases of the digestive system             | 0-00 | 0-00 | 0-00 | 0-00  | 0-00  | 0-00  | 0-00  | 0-00  | 0-00  | 0-00  | 0-00  | 0-00  | 0-00  | 0-00  | 0-00  | 0-00  | 0-01 |
|                                            | Diseases of the genitourinary system         | 0-00 | 0-00 | 0-00 | 0-00  | 0-00  | 0-00  | 0-00  | 0-00  | 0-00  | 0-00  | 0-00  | 0-00  | 0-00  | 0-00  | 0-00  | 0-01  | 0-01 |
|                                            | Diseases of the nervous system               | 0-00 | 0-00 | 0-00 | 0-00  | 0-00  | 0-00  | 0-00  | 0-00  | 0-00  | 0-00  | 0-00  | 0-00  | 0-00  | 0-00  | 0-00  | 0-00  | 0-00 |
|                                            | Diseases of the respiratory system           | 0-00 | 0-00 | 0-00 | 0-00  | 0-00  | 0-00  | 0-00  | 0-00  | 0-00  | 0-00  | 0-01  | 0-00  | 0-01  | 0-01  | 0-04  | 0-06  | 0-07 |
|                                            | Endocrine and metabolic diseases             | 0-00 | 0-00 | 0-00 | 0-00  | 0-00  | 0-00  | 0-00  | 0-00  | 0-00  | 0-00  | 0-00  | 0-00  | 0-00  | 0-00  | 0-01  | 0-01  | 0-02 |
|                                            | Infectious diseases                          | 0-00 | 0-00 | 0-00 | 0-00  | 0-00  | 0-00  | 0-00  | 0-00  | 0-00  | 0-00  | 0-00  | 0-00  | 0-01  | 0-01  | 0-01  | 0-01  | 0-02 |
|                                            | Injuries                                     | 0-00 | 0-01 | 0-00 | 0-00  | 0-03  | 0-03  | 0-02  | 0-02  | 0-02  | 0-02  | 0-02  | 0-03  | 0-02  | 0-03  | 0-03  | 0-02  | 0-03 |
|                                            | Nonavoidable deaths                          | 0-00 | 0-00 | 0-00 | 0-00  | 0-00  | 0-00  | 0-00  | 0-00  | 0-00  | 0-00  | 0-00  | 0-00  | 0-00  | 0-00  | 0-00  | 0-00  | 0-00 |
| Pregnancy, childbirth and perinatal period | 0-09                                         | 0-00 | 0-00 | 0-00 | 0-00  | 0-00  | 0-00  | 0-00  | 0-00  | 0-00  | 0-00  | 0-00  | 0-00  | 0-00  | 0-00  | 0-00  | 0-00  |      |
| Malta                                      | Adverse effects of medical and surgical care | 0-00 | 0-00 | 0-00 | 0-00  | 0-00  | 0-00  | 0-00  | 0-00  | 0-00  | 0-00  | 0-00  | 0-00  | 0-00  | 0-00  | 0-00  | 0-00  |      |
|                                            | Alcohol- related and drug related deaths     | 0-00 | 0-00 | 0-00 | 0-00  | 0-00  | 0-01  | 0-01  | 0-01  | 0-01  | 0-00  | 0-00  | 0-01  | 0-01  | 0-01  | 0-00  | 0-00  |      |
|                                            | Cancer                                       | 0-00 | 0-00 | 0-00 | 0-00  | 0-00  | 0-00  | 0-01  | 0-02  | 0-03  | 0-05  | 0-09  | 0-14  | 0-18  | 0-22  | 0-23  | 0-22  |      |
|                                            | Cardiovascular diseases                      | 0-00 | 0-00 | 0-00 | 0-00  | 0-00  | 0-00  | 0-00  | 0-00  | 0-00  | 0-01  | 0-03  | 0-03  | 0-05  | 0-10  | 0-14  | 0-23  |      |
|                                            | Cerebrovascular diseases                     | 0-00 | 0-00 | 0-00 | 0-01  | 0-00  | 0-00  | 0-00  | 0-00  | 0-00  | 0-01  | 0-01  | 0-01  | 0-02  | 0-03  | 0-05  | 0-09  |      |
|                                            | Congenital malformations                     | 0-08 | 0-00 | 0-00 | 0-00  | 0-00  | 0-00  | 0-00  | 0-00  | 0-00  | 0-00  | 0-00  | 0-00  | 0-00  | 0-00  | 0-00  | 0-00  | 0-00 |
|                                            | Diseases of the digestive system             | 0-00 | 0-00 | 0-00 | 0-00  | 0-00  | 0-00  | 0-00  | 0-00  | 0-00  | 0-00  | 0-00  | 0-00  | 0-00  | 0-00  | 0-00  | 0-00  | 0-01 |

| Country     | Cause Group                                  | 0-1  | 1-4  | 5-9  | 10-14 | 15-19 | 20-24 | 25-29 | 30-34 | 35-39 | 40-44 | 45-49 | 50-54 | 55-59 | 60-64 | 65-69 | 70-74 |
|-------------|----------------------------------------------|------|------|------|-------|-------|-------|-------|-------|-------|-------|-------|-------|-------|-------|-------|-------|
|             | Diseases of the genitourinary system         | 0.00 | 0.00 | 0.00 | 0.00  | 0.00  | 0.00  | 0.00  | 0.00  | 0.00  | 0.00  | 0.00  | 0.00  | 0.00  | 0.01  | 0.01  | 0.01  |
|             | Diseases of the nervous system               | 0.00 | 0.00 | 0.00 | 0.00  | 0.00  | 0.00  | 0.00  | 0.00  | 0.00  | 0.00  | 0.00  | 0.00  | 0.00  | 0.00  | 0.00  | 0.00  |
|             | Diseases of the respiratory system           | 0.01 | 0.00 | 0.00 | 0.00  | 0.00  | 0.00  | 0.00  | 0.00  | 0.00  | 0.00  | 0.01  | 0.01  | 0.01  | 0.02  | 0.03  | 0.05  |
|             | Endocrine and metabolic diseases             | 0.00 | 0.00 | 0.00 | 0.00  | 0.00  | 0.00  | 0.00  | 0.00  | 0.00  | 0.00  | 0.01  | 0.01  | 0.01  | 0.02  | 0.04  | 0.05  |
|             | Infectious diseases                          | 0.01 | 0.01 | 0.00 | 0.00  | 0.00  | 0.00  | 0.00  | 0.00  | 0.00  | 0.00  | 0.00  | 0.00  | 0.00  | 0.00  | 0.01  | 0.01  |
|             | Injuries                                     | 0.01 | 0.01 | 0.00 | 0.02  | 0.02  | 0.02  | 0.01  | 0.01  | 0.02  | 0.01  | 0.01  | 0.01  | 0.01  | 0.01  | 0.02  | 0.02  |
|             | Nonavoidable deaths                          | 0.00 | 0.00 | 0.00 | 0.00  | 0.00  | 0.00  | 0.00  | 0.00  | 0.00  | 0.00  | 0.00  | 0.00  | 0.00  | 0.00  | 0.00  | 0.00  |
|             | Pregnancy, childbirth and perinatal period   | 0.24 | 0.00 | 0.00 | 0.00  | 0.00  | 0.00  | 0.00  | 0.00  | 0.00  | 0.00  | 0.00  | 0.00  | 0.00  | 0.00  | 0.00  | 0.00  |
| Netherlands | Adverse effects of medical and surgical care | 0.00 | 0.00 | 0.00 | 0.00  | 0.00  | 0.00  | 0.00  | 0.00  | 0.00  | 0.00  | 0.00  | 0.00  | 0.00  | 0.00  | 0.00  | 0.00  |
|             | Alcohol- related and drug related deaths     | 0.00 | 0.00 | 0.00 | 0.00  | 0.00  | 0.00  | 0.01  | 0.01  | 0.01  | 0.01  | 0.01  | 0.02  | 0.02  | 0.02  | 0.01  | 0.01  |
|             | Cancer                                       | 0.00 | 0.00 | 0.00 | 0.00  | 0.00  | 0.00  | 0.01  | 0.02  | 0.04  | 0.08  | 0.12  | 0.19  | 0.25  | 0.30  | 0.31  | 0.31  |
|             | Cardiovascular diseases                      | 0.00 | 0.00 | 0.00 | 0.00  | 0.00  | 0.00  | 0.00  | 0.00  | 0.01  | 0.01  | 0.02  | 0.02  | 0.03  | 0.04  | 0.06  | 0.09  |
|             | Cerebrovascular diseases                     | 0.00 | 0.00 | 0.00 | 0.00  | 0.00  | 0.00  | 0.00  | 0.00  | 0.00  | 0.01  | 0.01  | 0.02  | 0.02  | 0.03  | 0.04  | 0.06  |
|             | Congenital malformations                     | 0.03 | 0.00 | 0.00 | 0.00  | 0.00  | 0.00  | 0.00  | 0.00  | 0.00  | 0.00  | 0.00  | 0.00  | 0.00  | 0.00  | 0.00  | 0.00  |
|             | Diseases of the digestive system             | 0.00 | 0.00 | 0.00 | 0.00  | 0.00  | 0.00  | 0.00  | 0.00  | 0.00  | 0.00  | 0.00  | 0.00  | 0.00  | 0.00  | 0.00  | 0.01  |
|             | Diseases of the genitourinary system         | 0.00 | 0.00 | 0.00 | 0.00  | 0.00  | 0.00  | 0.00  | 0.00  | 0.00  | 0.00  | 0.00  | 0.00  | 0.00  | 0.00  | 0.01  | 0.01  |
|             | Diseases of the nervous system               | 0.00 | 0.00 | 0.00 | 0.00  | 0.00  | 0.00  | 0.00  | 0.00  | 0.00  | 0.00  | 0.00  | 0.00  | 0.00  | 0.00  | 0.00  | 0.00  |
|             | Diseases of the respiratory system           | 0.00 | 0.00 | 0.00 | 0.00  | 0.00  | 0.00  | 0.00  | 0.00  | 0.00  | 0.00  | 0.01  | 0.02  | 0.03  | 0.05  | 0.07  | 0.09  |
|             | Endocrine and metabolic diseases             | 0.00 | 0.00 | 0.00 | 0.00  | 0.00  | 0.00  | 0.00  | 0.00  | 0.00  | 0.00  | 0.00  | 0.01  | 0.01  | 0.01  | 0.02  | 0.02  |
|             | Infectious diseases                          | 0.00 | 0.00 | 0.00 | 0.00  | 0.00  | 0.00  | 0.00  | 0.00  | 0.00  | 0.00  | 0.00  | 0.00  | 0.01  | 0.01  | 0.01  | 0.01  |
|             | Injuries                                     | 0.01 | 0.01 | 0.00 | 0.01  | 0.02  | 0.02  | 0.02  | 0.02  | 0.02  | 0.02  | 0.02  | 0.02  | 0.02  | 0.02  | 0.02  | 0.02  |
|             | Nonavoidable deaths                          | 0.00 | 0.00 | 0.00 | 0.00  | 0.00  | 0.00  | 0.00  | 0.00  | 0.00  | 0.00  | 0.00  | 0.00  | 0.00  | 0.00  | 0.00  | 0.00  |



| Country  | Cause Group                                  | 0-1  | 1-4  | 5-9  | 10-14 | 15-19 | 20-24 | 25-29 | 30-34 | 35-39 | 40-44 | 45-49 | 50-54 | 55-59 | 60-64 | 65-69 | 70-74 |
|----------|----------------------------------------------|------|------|------|-------|-------|-------|-------|-------|-------|-------|-------|-------|-------|-------|-------|-------|
|          | Pregnancy, childbirth and perinatal period   | 0.16 | 0.00 | 0.00 | 0.00  | 0.00  | 0.00  | 0.00  | 0.00  | 0.00  | 0.00  | 0.00  | 0.00  | 0.00  | 0.00  | 0.00  | 0.00  |
| Poland   | Adverse effects of medical and surgical care | 0.00 | 0.00 | 0.00 | 0.00  | 0.00  | 0.00  | 0.00  | 0.00  | 0.00  | 0.00  | 0.00  | 0.00  | 0.00  | 0.00  | 0.00  | 0.00  |
|          | Alcohol- related and drug related deaths     | 0.00 | 0.00 | 0.00 | 0.00  | 0.00  | 0.00  | 0.01  | 0.01  | 0.02  | 0.03  | 0.03  | 0.04  | 0.04  | 0.03  | 0.02  | 0.01  |
|          | Cancer                                       | 0.00 | 0.00 | 0.00 | 0.00  | 0.00  | 0.00  | 0.01  | 0.02  | 0.04  | 0.07  | 0.12  | 0.18  | 0.25  | 0.29  | 0.30  | 0.27  |
|          | Cardiovascular diseases                      | 0.00 | 0.00 | 0.00 | 0.00  | 0.00  | 0.00  | 0.00  | 0.01  | 0.01  | 0.03  | 0.04  | 0.07  | 0.11  | 0.16  | 0.24  |       |
|          | Cerebrovascular diseases                     | 0.00 | 0.00 | 0.00 | 0.00  | 0.00  | 0.00  | 0.00  | 0.01  | 0.01  | 0.01  | 0.02  | 0.03  | 0.04  | 0.06  | 0.09  | 0.13  |
|          | Congenital malformations                     | 0.06 | 0.01 | 0.00 | 0.00  | 0.00  | 0.00  | 0.00  | 0.00  | 0.00  | 0.00  | 0.00  | 0.00  | 0.00  | 0.00  | 0.00  | 0.00  |
|          | Diseases of the digestive system             | 0.00 | 0.00 | 0.00 | 0.00  | 0.00  | 0.00  | 0.00  | 0.00  | 0.00  | 0.01  | 0.01  | 0.01  | 0.01  | 0.01  | 0.01  | 0.02  |
|          | Diseases of the genitourinary system         | 0.00 | 0.00 | 0.00 | 0.00  | 0.00  | 0.00  | 0.00  | 0.00  | 0.00  | 0.00  | 0.00  | 0.00  | 0.00  | 0.01  | 0.01  | 0.01  |
|          | Diseases of the nervous system               | 0.00 | 0.00 | 0.00 | 0.00  | 0.00  | 0.00  | 0.00  | 0.00  | 0.00  | 0.00  | 0.00  | 0.00  | 0.00  | 0.00  | 0.00  | 0.00  |
|          | Diseases of the respiratory system           | 0.01 | 0.00 | 0.00 | 0.00  | 0.00  | 0.00  | 0.00  | 0.01  | 0.01  | 0.01  | 0.02  | 0.02  | 0.03  | 0.05  | 0.06  |       |
|          | Endocrine and metabolic diseases             | 0.00 | 0.00 | 0.00 | 0.00  | 0.00  | 0.00  | 0.00  | 0.00  | 0.00  | 0.00  | 0.00  | 0.01  | 0.01  | 0.02  | 0.03  | 0.04  |
|          | Infectious diseases                          | 0.00 | 0.00 | 0.00 | 0.00  | 0.00  | 0.00  | 0.00  | 0.00  | 0.00  | 0.00  | 0.00  | 0.00  | 0.00  | 0.01  | 0.01  | 0.01  |
|          | Injuries                                     | 0.01 | 0.01 | 0.01 | 0.02  | 0.04  | 0.03  | 0.02  | 0.02  | 0.02  | 0.03  | 0.03  | 0.03  | 0.03  | 0.02  | 0.02  | 0.02  |
|          | Nonavoidable deaths                          | 0.00 | 0.00 | 0.00 | 0.00  | 0.00  | 0.00  | 0.00  | 0.00  | 0.00  | 0.00  | 0.00  | 0.00  | 0.00  | 0.00  | 0.00  | 0.00  |
|          | Pregnancy, childbirth and perinatal period   | 0.19 | 0.00 | 0.00 | 0.00  | 0.00  | 0.00  | 0.00  | 0.00  | 0.00  | 0.00  | 0.00  | 0.00  | 0.00  | 0.00  | 0.00  | 0.00  |
| Portugal | Adverse effects of medical and surgical care | 0.00 | 0.00 | 0.00 | 0.00  | 0.00  | 0.00  | 0.00  | 0.00  | 0.00  | 0.00  | 0.00  | 0.00  | 0.00  | 0.00  | 0.00  | 0.00  |
|          | Alcohol- related and drug related deaths     | 0.00 | 0.00 | 0.00 | 0.00  | 0.00  | 0.00  | 0.00  | 0.00  | 0.01  | 0.01  | 0.02  | 0.02  | 0.01  | 0.01  | 0.01  | 0.01  |
|          | Cancer                                       | 0.00 | 0.00 | 0.00 | 0.00  | 0.00  | 0.00  | 0.01  | 0.02  | 0.04  | 0.07  | 0.11  | 0.14  | 0.17  | 0.18  | 0.19  | 0.19  |
|          | Cardiovascular diseases                      | 0.00 | 0.00 | 0.00 | 0.00  | 0.00  | 0.00  | 0.00  | 0.01  | 0.01  | 0.02  | 0.02  | 0.03  | 0.04  | 0.06  | 0.10  |       |
|          | Cerebrovascular diseases                     | 0.00 | 0.00 | 0.00 | 0.00  | 0.00  | 0.00  | 0.00  | 0.01  | 0.01  | 0.02  | 0.02  | 0.03  | 0.04  | 0.06  | 0.11  |       |
|          | Congenital malformations                     | 0.03 | 0.00 | 0.00 | 0.00  | 0.00  | 0.00  | 0.00  | 0.00  | 0.00  | 0.00  | 0.00  | 0.00  | 0.00  | 0.00  | 0.00  | 0.00  |

| Country | Cause Group                                  | 0-1  | 1-4  | 5-9  | 10-14 | 15-19 | 20-24 | 25-29 | 30-34 | 35-39 | 40-44 | 45-49 | 50-54 | 55-59 | 60-64 | 65-69 | 70-74 |
|---------|----------------------------------------------|------|------|------|-------|-------|-------|-------|-------|-------|-------|-------|-------|-------|-------|-------|-------|
|         | Diseases of the digestive system             | 0.00 | 0.00 | 0.00 | 0.00  | 0.00  | 0.00  | 0.00  | 0.00  | 0.00  | 0.00  | 0.00  | 0.00  | 0.00  | 0.00  | 0.01  | 0.01  |
|         | Diseases of the genitourinary system         | 0.00 | 0.00 | 0.00 | 0.00  | 0.00  | 0.00  | 0.00  | 0.00  | 0.00  | 0.00  | 0.00  | 0.00  | 0.00  | 0.00  | 0.01  | 0.01  |
|         | Diseases of the nervous system               | 0.00 | 0.00 | 0.00 | 0.00  | 0.00  | 0.00  | 0.00  | 0.00  | 0.00  | 0.00  | 0.00  | 0.00  | 0.00  | 0.00  | 0.00  | 0.00  |
|         | Diseases of the respiratory system           | 0.00 | 0.00 | 0.00 | 0.00  | 0.00  | 0.00  | 0.00  | 0.00  | 0.00  | 0.01  | 0.01  | 0.01  | 0.01  | 0.02  | 0.03  | 0.05  |
|         | Endocrine and metabolic diseases             | 0.00 | 0.00 | 0.00 | 0.00  | 0.00  | 0.00  | 0.00  | 0.00  | 0.00  | 0.00  | 0.00  | 0.01  | 0.01  | 0.02  | 0.04  | 0.06  |
|         | Infectious diseases                          | 0.00 | 0.00 | 0.00 | 0.00  | 0.00  | 0.00  | 0.01  | 0.01  | 0.01  | 0.01  | 0.01  | 0.01  | 0.01  | 0.01  | 0.01  | 0.02  |
|         | Injuries                                     | 0.00 | 0.01 | 0.01 | 0.01  | 0.02  | 0.03  | 0.02  | 0.02  | 0.02  | 0.02  | 0.02  | 0.02  | 0.02  | 0.02  | 0.02  | 0.03  |
|         | Nonavoidable deaths                          | 0.00 | 0.00 | 0.00 | 0.00  | 0.00  | 0.00  | 0.00  | 0.00  | 0.00  | 0.00  | 0.00  | 0.00  | 0.00  | 0.00  | 0.00  | 0.00  |
|         | Pregnancy, childbirth and perinatal period   | 0.14 | 0.00 | 0.00 | 0.00  | 0.00  | 0.00  | 0.00  | 0.00  | 0.00  | 0.00  | 0.00  | 0.00  | 0.00  | 0.00  | 0.00  | 0.00  |
| Romania | Adverse effects of medical and surgical care | 0.00 | 0.00 | 0.00 | 0.00  | 0.00  | 0.00  | 0.00  | 0.00  | 0.00  | 0.00  | 0.00  | 0.00  | 0.00  | 0.00  | 0.00  | 0.00  |
|         | Alcohol- related and drug related deaths     | 0.00 | 0.00 | 0.00 | 0.00  | 0.00  | 0.00  | 0.00  | 0.01  | 0.01  | 0.03  | 0.05  | 0.07  | 0.08  | 0.08  | 0.07  | 0.06  |
|         | Cancer                                       | 0.00 | 0.00 | 0.00 | 0.00  | 0.00  | 0.01  | 0.01  | 0.03  | 0.05  | 0.09  | 0.14  | 0.19  | 0.22  | 0.23  | 0.22  | 0.21  |
|         | Cardiovascular diseases                      | 0.00 | 0.00 | 0.00 | 0.00  | 0.00  | 0.00  | 0.01  | 0.01  | 0.02  | 0.03  | 0.06  | 0.09  | 0.15  | 0.23  | 0.32  | 0.47  |
|         | Cerebrovascular diseases                     | 0.00 | 0.00 | 0.00 | 0.00  | 0.00  | 0.00  | 0.00  | 0.01  | 0.01  | 0.02  | 0.03  | 0.06  | 0.08  | 0.13  | 0.20  | 0.30  |
|         | Congenital malformations                     | 0.09 | 0.01 | 0.00 | 0.00  | 0.00  | 0.00  | 0.00  | 0.00  | 0.00  | 0.00  | 0.00  | 0.00  | 0.00  | 0.00  | 0.00  | 0.00  |
|         | Diseases of the digestive system             | 0.00 | 0.00 | 0.00 | 0.00  | 0.00  | 0.00  | 0.00  | 0.00  | 0.00  | 0.00  | 0.00  | 0.01  | 0.01  | 0.01  | 0.01  | 0.01  |
|         | Diseases of the genitourinary system         | 0.00 | 0.00 | 0.00 | 0.00  | 0.00  | 0.00  | 0.00  | 0.00  | 0.00  | 0.00  | 0.01  | 0.01  | 0.01  | 0.01  | 0.02  | 0.02  |
|         | Diseases of the nervous system               | 0.00 | 0.00 | 0.00 | 0.00  | 0.00  | 0.00  | 0.00  | 0.00  | 0.00  | 0.00  | 0.00  | 0.00  | 0.00  | 0.00  | 0.00  | 0.00  |
|         | Diseases of the respiratory system           | 0.18 | 0.03 | 0.01 | 0.01  | 0.01  | 0.01  | 0.01  | 0.01  | 0.01  | 0.01  | 0.02  | 0.02  | 0.03  | 0.04  | 0.05  | 0.06  |
|         | Endocrine and metabolic diseases             | 0.00 | 0.00 | 0.00 | 0.00  | 0.00  | 0.00  | 0.00  | 0.00  | 0.00  | 0.00  | 0.00  | 0.01  | 0.01  | 0.02  | 0.02  | 0.02  |
|         | Infectious diseases                          | 0.02 | 0.00 | 0.00 | 0.00  | 0.01  | 0.01  | 0.01  | 0.01  | 0.01  | 0.01  | 0.01  | 0.01  | 0.01  | 0.01  | 0.01  | 0.01  |
|         | Injuries                                     | 0.02 | 0.03 | 0.02 | 0.03  | 0.04  | 0.03  | 0.02  | 0.03  | 0.03  | 0.03  | 0.03  | 0.03  | 0.03  | 0.03  | 0.03  | 0.02  |

| Country  | Cause Group                                  | 0-1  | 1-4  | 5-9  | 10-14 | 15-19 | 20-24 | 25-29 | 30-34 | 35-39 | 40-44 | 45-49 | 50-54 | 55-59 | 60-64 | 65-69 | 70-74 |      |
|----------|----------------------------------------------|------|------|------|-------|-------|-------|-------|-------|-------|-------|-------|-------|-------|-------|-------|-------|------|
| Slovakia | Nonavoidable deaths                          | 0-00 | 0-00 | 0-00 | 0-00  | 0-00  | 0-00  | 0-00  | 0-00  | 0-00  | 0-00  | 0-00  | 0-00  | 0-00  | 0-00  | 0-00  | 0-00  |      |
|          | Pregnancy, childbirth and perinatal period   | 0-24 | 0-00 | 0-00 | 0-00  | 0-00  | 0-00  | 0-00  | 0-00  | 0-00  | 0-00  | 0-00  | 0-00  | 0-00  | 0-00  | 0-00  | 0-00  |      |
|          | Adverse effects of medical and surgical care | 0-00 | 0-00 | 0-00 | 0-00  | 0-00  | 0-00  | 0-00  | 0-00  | 0-00  | 0-00  | 0-00  | 0-00  | 0-00  | 0-00  | 0-00  | 0-00  |      |
|          | Alcohol- related and drug related deaths     | 0-00 | 0-00 | 0-00 | 0-00  | 0-00  | 0-00  | 0-00  | 0-00  | 0-01  | 0-02  | 0-03  | 0-05  | 0-05  | 0-06  | 0-05  | 0-03  | 0-02 |
|          | Cancer                                       | 0-00 | 0-00 | 0-00 | 0-00  | 0-00  | 0-00  | 0-00  | 0-01  | 0-02  | 0-04  | 0-07  | 0-11  | 0-16  | 0-20  | 0-24  | 0-25  | 0-23 |
|          | Cardiovascular diseases                      | 0-00 | 0-00 | 0-00 | 0-00  | 0-00  | 0-00  | 0-00  | 0-00  | 0-01  | 0-02  | 0-04  | 0-07  | 0-11  | 0-18  | 0-29  | 0-44  |      |
|          | Cerebrovascular diseases                     | 0-00 | 0-00 | 0-00 | 0-00  | 0-00  | 0-00  | 0-00  | 0-00  | 0-01  | 0-01  | 0-02  | 0-03  | 0-04  | 0-06  | 0-09  | 0-14  |      |
|          | Congenital malformations                     | 0-05 | 0-01 | 0-00 | 0-00  | 0-00  | 0-00  | 0-00  | 0-00  | 0-00  | 0-00  | 0-00  | 0-00  | 0-00  | 0-00  | 0-00  | 0-00  | 0-00 |
|          | Diseases of the digestive system             | 0-00 | 0-00 | 0-00 | 0-00  | 0-00  | 0-00  | 0-00  | 0-00  | 0-00  | 0-00  | 0-01  | 0-01  | 0-01  | 0-01  | 0-01  | 0-01  | 0-02 |
|          | Diseases of the genitourinary system         | 0-00 | 0-00 | 0-00 | 0-00  | 0-00  | 0-00  | 0-00  | 0-00  | 0-00  | 0-00  | 0-00  | 0-00  | 0-00  | 0-01  | 0-01  | 0-02  | 0-02 |
|          | Diseases of the nervous system               | 0-00 | 0-00 | 0-00 | 0-00  | 0-00  | 0-00  | 0-00  | 0-00  | 0-00  | 0-00  | 0-00  | 0-00  | 0-00  | 0-00  | 0-00  | 0-00  | 0-00 |
|          | Diseases of the respiratory system           | 0-03 | 0-01 | 0-01 | 0-00  | 0-00  | 0-00  | 0-00  | 0-00  | 0-01  | 0-01  | 0-01  | 0-01  | 0-02  | 0-03  | 0-03  | 0-04  | 0-06 |
|          | Endocrine and metabolic diseases             | 0-00 | 0-00 | 0-00 | 0-00  | 0-00  | 0-00  | 0-00  | 0-00  | 0-00  | 0-00  | 0-00  | 0-00  | 0-01  | 0-01  | 0-02  | 0-02  | 0-03 |
|          | Infectious diseases                          | 0-01 | 0-00 | 0-00 | 0-00  | 0-00  | 0-00  | 0-00  | 0-00  | 0-00  | 0-00  | 0-00  | 0-00  | 0-00  | 0-00  | 0-01  | 0-01  | 0-01 |
|          | Injuries                                     | 0-01 | 0-01 | 0-01 | 0-01  | 0-03  | 0-02  | 0-02  | 0-02  | 0-02  | 0-02  | 0-03  | 0-03  | 0-03  | 0-03  | 0-02  | 0-02  | 0-03 |
| Slovenia | Nonavoidable deaths                          | 0-00 | 0-00 | 0-00 | 0-00  | 0-00  | 0-00  | 0-00  | 0-00  | 0-00  | 0-00  | 0-00  | 0-00  | 0-00  | 0-00  | 0-00  | 0-00  |      |
|          | Pregnancy, childbirth and perinatal period   | 0-17 | 0-00 | 0-00 | 0-00  | 0-00  | 0-00  | 0-00  | 0-00  | 0-00  | 0-00  | 0-00  | 0-00  | 0-00  | 0-00  | 0-00  | 0-00  |      |
|          | Adverse effects of medical and surgical care | 0-00 | 0-00 | 0-00 | 0-00  | 0-00  | 0-00  | 0-00  | 0-00  | 0-00  | 0-00  | 0-00  | 0-00  | 0-00  | 0-00  | 0-01  | 0-01  |      |
|          | Alcohol- related and drug related deaths     | 0-00 | 0-00 | 0-00 | 0-00  | 0-00  | 0-01  | 0-01  | 0-01  | 0-01  | 0-02  | 0-03  | 0-04  | 0-05  | 0-06  | 0-06  | 0-06  |      |
|          | Cancer                                       | 0-00 | 0-00 | 0-00 | 0-00  | 0-00  | 0-00  | 0-01  | 0-02  | 0-04  | 0-06  | 0-10  | 0-17  | 0-23  | 0-26  | 0-27  | 0-27  |      |
|          | Cardiovascular diseases                      | 0-00 | 0-00 | 0-00 | 0-00  | 0-00  | 0-00  | 0-00  | 0-00  | 0-00  | 0-01  | 0-01  | 0-03  | 0-04  | 0-06  | 0-09  | 0-15  |      |
|          | Cerebrovascular diseases                     | 0-00 | 0-00 | 0-00 | 0-00  | 0-00  | 0-00  | 0-00  | 0-00  | 0-00  | 0-01  | 0-02  | 0-02  | 0-02  | 0-04  | 0-06  | 0-10  |      |

| Country | Cause Group                                  | 0-1  | 1-4  | 5-9  | 10-14 | 15-19 | 20-24 | 25-29 | 30-34 | 35-39 | 40-44 | 45-49 | 50-54 | 55-59 | 60-64 | 65-69 | 70-74 |
|---------|----------------------------------------------|------|------|------|-------|-------|-------|-------|-------|-------|-------|-------|-------|-------|-------|-------|-------|
|         | Congenital malformations                     | 0.02 | 0.00 | 0.00 | 0.00  | 0.00  | 0.00  | 0.00  | 0.00  | 0.00  | 0.00  | 0.00  | 0.00  | 0.00  | 0.00  | 0.00  | 0.00  |
|         | Diseases of the digestive system             | 0.00 | 0.00 | 0.00 | 0.00  | 0.00  | 0.00  | 0.00  | 0.00  | 0.00  | 0.00  | 0.00  | 0.00  | 0.00  | 0.01  | 0.01  | 0.01  |
|         | Diseases of the genitourinary system         | 0.00 | 0.00 | 0.00 | 0.00  | 0.00  | 0.00  | 0.00  | 0.00  | 0.00  | 0.00  | 0.00  | 0.00  | 0.00  | 0.00  | 0.01  | 0.01  |
|         | Diseases of the nervous system               | 0.00 | 0.00 | 0.00 | 0.00  | 0.00  | 0.00  | 0.00  | 0.00  | 0.00  | 0.00  | 0.00  | 0.00  | 0.00  | 0.00  | 0.00  | 0.00  |
|         | Diseases of the respiratory system           | 0.01 | 0.00 | 0.00 | 0.00  | 0.00  | 0.00  | 0.00  | 0.00  | 0.00  | 0.00  | 0.00  | 0.01  | 0.01  | 0.02  | 0.02  | 0.04  |
|         | Endocrine and metabolic diseases             | 0.00 | 0.00 | 0.00 | 0.00  | 0.00  | 0.00  | 0.00  | 0.00  | 0.00  | 0.00  | 0.00  | 0.00  | 0.00  | 0.01  | 0.01  | 0.02  |
|         | Infectious diseases                          | 0.00 | 0.00 | 0.00 | 0.00  | 0.00  | 0.00  | 0.00  | 0.00  | 0.00  | 0.00  | 0.00  | 0.00  | 0.00  | 0.00  | 0.00  | 0.01  |
|         | Injuries                                     | 0.00 | 0.01 | 0.01 | 0.01  | 0.03  | 0.03  | 0.02  | 0.02  | 0.02  | 0.03  | 0.03  | 0.03  | 0.03  | 0.03  | 0.03  | 0.04  |
|         | Nonavoidable deaths                          | 0.00 | 0.00 | 0.00 | 0.00  | 0.00  | 0.00  | 0.00  | 0.00  | 0.00  | 0.00  | 0.00  | 0.00  | 0.00  | 0.00  | 0.00  | 0.00  |
|         | Pregnancy, childbirth and perinatal period   | 0.11 | 0.00 | 0.00 | 0.00  | 0.00  | 0.00  | 0.00  | 0.00  | 0.00  | 0.00  | 0.00  | 0.00  | 0.00  | 0.00  | 0.00  | 0.00  |
| Spain   | Adverse effects of medical and surgical care | 0.00 | 0.00 | 0.00 | 0.00  | 0.00  | 0.00  | 0.00  | 0.00  | 0.00  | 0.00  | 0.00  | 0.00  | 0.00  | 0.00  | 0.00  | 0.00  |
|         | Alcohol- related and drug related deaths     | 0.00 | 0.00 | 0.00 | 0.00  | 0.00  | 0.00  | 0.00  | 0.00  | 0.01  | 0.01  | 0.01  | 0.01  | 0.01  | 0.01  | 0.01  | 0.01  |
|         | Cancer                                       | 0.00 | 0.00 | 0.00 | 0.00  | 0.00  | 0.00  | 0.01  | 0.02  | 0.03  | 0.06  | 0.10  | 0.14  | 0.17  | 0.18  | 0.19  | 0.19  |
|         | Cardiovascular diseases                      | 0.00 | 0.00 | 0.00 | 0.00  | 0.00  | 0.00  | 0.00  | 0.00  | 0.00  | 0.01  | 0.01  | 0.02  | 0.03  | 0.04  | 0.06  | 0.10  |
|         | Cerebrovascular diseases                     | 0.00 | 0.00 | 0.00 | 0.00  | 0.00  | 0.00  | 0.00  | 0.00  | 0.00  | 0.01  | 0.01  | 0.01  | 0.02  | 0.02  | 0.03  | 0.06  |
|         | Congenital malformations                     | 0.03 | 0.00 | 0.00 | 0.00  | 0.00  | 0.00  | 0.00  | 0.00  | 0.00  | 0.00  | 0.00  | 0.00  | 0.00  | 0.00  | 0.00  | 0.00  |
|         | Diseases of the digestive system             | 0.00 | 0.00 | 0.00 | 0.00  | 0.00  | 0.00  | 0.00  | 0.00  | 0.00  | 0.00  | 0.00  | 0.00  | 0.00  | 0.00  | 0.01  | 0.01  |
|         | Diseases of the genitourinary system         | 0.00 | 0.00 | 0.00 | 0.00  | 0.00  | 0.00  | 0.00  | 0.00  | 0.00  | 0.00  | 0.00  | 0.00  | 0.00  | 0.00  | 0.01  | 0.01  |
|         | Diseases of the nervous system               | 0.00 | 0.00 | 0.00 | 0.00  | 0.00  | 0.00  | 0.00  | 0.00  | 0.00  | 0.00  | 0.00  | 0.00  | 0.00  | 0.00  | 0.00  | 0.00  |
|         | Diseases of the respiratory system           | 0.00 | 0.00 | 0.00 | 0.00  | 0.00  | 0.00  | 0.00  | 0.00  | 0.00  | 0.01  | 0.01  | 0.01  | 0.01  | 0.02  | 0.02  | 0.04  |
|         | Endocrine and metabolic diseases             | 0.00 | 0.00 | 0.00 | 0.00  | 0.00  | 0.00  | 0.00  | 0.00  | 0.00  | 0.00  | 0.00  | 0.00  | 0.00  | 0.01  | 0.01  | 0.02  |
|         | Infectious diseases                          | 0.00 | 0.00 | 0.00 | 0.00  | 0.00  | 0.00  | 0.00  | 0.00  | 0.01  | 0.01  | 0.01  | 0.01  | 0.01  | 0.01  | 0.01  | 0.02  |

| Country             | Cause Group                                  | 0-1  | 1-4  | 5-9  | 10-14 | 15-19 | 20-24 | 25-29 | 30-34 | 35-39 | 40-44 | 45-49 | 50-54 | 55-59 | 60-64 | 65-69 | 70-74 |      |
|---------------------|----------------------------------------------|------|------|------|-------|-------|-------|-------|-------|-------|-------|-------|-------|-------|-------|-------|-------|------|
| Sweden              | Injuries                                     | 0.00 | 0.01 | 0.00 | 0.01  | 0.02  | 0.02  | 0.02  | 0.02  | 0.02  | 0.02  | 0.02  | 0.02  | 0.02  | 0.02  | 0.02  | 0.02  |      |
|                     | Nonavoidable deaths                          | 0.00 | 0.00 | 0.00 | 0.00  | 0.00  | 0.00  | 0.00  | 0.00  | 0.00  | 0.00  | 0.00  | 0.00  | 0.00  | 0.00  | 0.00  | 0.00  |      |
|                     | Pregnancy, childbirth and perinatal period   | 0.13 | 0.00 | 0.00 | 0.00  | 0.00  | 0.00  | 0.00  | 0.00  | 0.00  | 0.00  | 0.00  | 0.00  | 0.00  | 0.00  | 0.00  | 0.00  |      |
|                     | Adverse effects of medical and surgical care | 0.00 | 0.00 | 0.00 | 0.00  | 0.00  | 0.00  | 0.00  | 0.00  | 0.00  | 0.00  | 0.00  | 0.00  | 0.00  | 0.00  | 0.00  | 0.00  |      |
|                     | Alcohol- related and drug related deaths     | 0.00 | 0.00 | 0.00 | 0.00  | 0.00  | 0.02  | 0.02  | 0.02  | 0.02  | 0.02  | 0.02  | 0.03  | 0.03  | 0.03  | 0.03  | 0.03  | 0.02 |
|                     | Cancer                                       | 0.00 | 0.00 | 0.00 | 0.00  | 0.00  | 0.00  | 0.01  | 0.02  | 0.03  | 0.05  | 0.08  | 0.12  | 0.17  | 0.22  | 0.26  | 0.28  |      |
|                     | Cardiovascular diseases                      | 0.00 | 0.00 | 0.00 | 0.00  | 0.00  | 0.00  | 0.00  | 0.00  | 0.00  | 0.01  | 0.02  | 0.02  | 0.04  | 0.07  | 0.10  | 0.15  |      |
|                     | Cerebrovascular diseases                     | 0.00 | 0.00 | 0.00 | 0.00  | 0.00  | 0.00  | 0.00  | 0.00  | 0.00  | 0.00  | 0.01  | 0.01  | 0.02  | 0.03  | 0.04  | 0.06  |      |
|                     | Congenital malformations                     | 0.01 | 0.00 | 0.00 | 0.00  | 0.00  | 0.00  | 0.00  | 0.00  | 0.00  | 0.00  | 0.00  | 0.00  | 0.00  | 0.00  | 0.00  | 0.00  |      |
|                     | Diseases of the digestive system             | 0.00 | 0.00 | 0.00 | 0.00  | 0.00  | 0.00  | 0.00  | 0.00  | 0.00  | 0.00  | 0.00  | 0.00  | 0.00  | 0.01  | 0.01  | 0.01  |      |
|                     | Diseases of the genitourinary system         | 0.00 | 0.00 | 0.00 | 0.00  | 0.00  | 0.00  | 0.00  | 0.00  | 0.00  | 0.00  | 0.00  | 0.00  | 0.00  | 0.00  | 0.00  | 0.01  |      |
|                     | Diseases of the nervous system               | 0.00 | 0.00 | 0.00 | 0.00  | 0.00  | 0.00  | 0.00  | 0.00  | 0.00  | 0.00  | 0.00  | 0.00  | 0.00  | 0.00  | 0.00  | 0.00  |      |
|                     | Diseases of the respiratory system           | 0.00 | 0.00 | 0.00 | 0.00  | 0.00  | 0.00  | 0.00  | 0.00  | 0.00  | 0.00  | 0.00  | 0.01  | 0.02  | 0.03  | 0.05  | 0.08  |      |
|                     | Endocrine and metabolic diseases             | 0.00 | 0.00 | 0.00 | 0.00  | 0.00  | 0.00  | 0.00  | 0.00  | 0.00  | 0.00  | 0.00  | 0.01  | 0.01  | 0.01  | 0.01  | 0.02  |      |
| Infectious diseases | 0.00                                         | 0.00 | 0.00 | 0.00 | 0.00  | 0.00  | 0.00  | 0.00  | 0.00  | 0.00  | 0.00  | 0.00  | 0.00  | 0.01  | 0.01  | 0.01  |       |      |
| United Kingdom      | Injuries                                     | 0.00 | 0.00 | 0.00 | 0.01  | 0.03  | 0.03  | 0.02  | 0.02  | 0.02  | 0.02  | 0.02  | 0.02  | 0.02  | 0.02  | 0.02  | 0.02  |      |
|                     | Nonavoidable deaths                          | 0.00 | 0.00 | 0.00 | 0.00  | 0.00  | 0.00  | 0.00  | 0.00  | 0.00  | 0.00  | 0.00  | 0.00  | 0.00  | 0.00  | 0.00  | 0.00  |      |
|                     | Pregnancy, childbirth and perinatal period   | 0.08 | 0.00 | 0.00 | 0.00  | 0.00  | 0.00  | 0.00  | 0.00  | 0.00  | 0.00  | 0.00  | 0.00  | 0.00  | 0.00  | 0.00  | 0.00  |      |
|                     | Adverse effects of medical and surgical care | 0.00 | 0.00 | 0.00 | 0.00  | 0.00  | 0.00  | 0.00  | 0.00  | 0.00  | 0.00  | 0.00  | 0.00  | 0.00  | 0.00  | 0.00  | 0.00  |      |
|                     | Alcohol- related and drug related deaths     | 0.00 | 0.00 | 0.00 | 0.00  | 0.01  | 0.01  | 0.01  | 0.02  | 0.03  | 0.04  | 0.04  | 0.04  | 0.04  | 0.03  | 0.02  | 0.01  |      |
|                     | Cancer                                       | 0.00 | 0.00 | 0.00 | 0.00  | 0.00  | 0.00  | 0.01  | 0.02  | 0.04  | 0.07  | 0.10  | 0.15  | 0.20  | 0.25  | 0.29  | 0.31  |      |
|                     | Cardiovascular diseases                      | 0.00 | 0.00 | 0.00 | 0.00  | 0.00  | 0.00  | 0.00  | 0.01  | 0.01  | 0.02  | 0.03  | 0.04  | 0.06  | 0.08  | 0.12  | 0.17  |      |

| Country                   | Cause Group                                  | 0-1  | 1-4  | 5-9  | 10-14 | 15-19 | 20-24 | 25-29 | 30-34 | 35-39 | 40-44 | 45-49 | 50-54 | 55-59 | 60-64 | 65-69 | 70-74 |
|---------------------------|----------------------------------------------|------|------|------|-------|-------|-------|-------|-------|-------|-------|-------|-------|-------|-------|-------|-------|
|                           | Cerebrovascular diseases                     | 0-00 | 0-00 | 0-00 | 0-00  | 0-00  | 0-00  | 0-00  | 0-00  | 0-01  | 0-01  | 0-01  | 0-02  | 0-02  | 0-03  | 0-04  | 0-07  |
|                           | Congenital malformations                     | 0-03 | 0-00 | 0-00 | 0-00  | 0-00  | 0-00  | 0-00  | 0-00  | 0-00  | 0-00  | 0-00  | 0-00  | 0-00  | 0-00  | 0-00  | 0-00  |
|                           | Diseases of the digestive system             | 0-00 | 0-00 | 0-00 | 0-00  | 0-00  | 0-00  | 0-00  | 0-00  | 0-00  | 0-00  | 0-00  | 0-00  | 0-01  | 0-01  | 0-01  | 0-02  |
|                           | Diseases of the genitourinary system         | 0-00 | 0-00 | 0-00 | 0-00  | 0-00  | 0-00  | 0-00  | 0-00  | 0-00  | 0-00  | 0-00  | 0-00  | 0-00  | 0-00  | 0-00  | 0-01  |
|                           | Diseases of the nervous system               | 0-00 | 0-00 | 0-00 | 0-00  | 0-00  | 0-00  | 0-00  | 0-00  | 0-00  | 0-00  | 0-00  | 0-00  | 0-00  | 0-00  | 0-00  | 0-00  |
|                           | Diseases of the respiratory system           | 0-00 | 0-00 | 0-00 | 0-00  | 0-00  | 0-00  | 0-00  | 0-00  | 0-01  | 0-01  | 0-02  | 0-03  | 0-04  | 0-07  | 0-10  | 0-14  |
|                           | Endocrine and metabolic diseases             | 0-00 | 0-00 | 0-00 | 0-00  | 0-00  | 0-00  | 0-00  | 0-00  | 0-00  | 0-00  | 0-00  | 0-00  | 0-01  | 0-01  | 0-01  | 0-01  |
|                           | Infectious diseases                          | 0-00 | 0-00 | 0-00 | 0-00  | 0-00  | 0-00  | 0-00  | 0-00  | 0-00  | 0-00  | 0-00  | 0-01  | 0-01  | 0-01  | 0-01  | 0-01  |
|                           | Injuries                                     | 0-00 | 0-01 | 0-00 | 0-01  | 0-02  | 0-02  | 0-02  | 0-02  | 0-02  | 0-02  | 0-02  | 0-02  | 0-01  | 0-01  | 0-01  | 0-01  |
|                           | Nonavoidable deaths                          | 0-00 | 0-00 | 0-00 | 0-00  | 0-00  | 0-00  | 0-00  | 0-00  | 0-00  | 0-00  | 0-00  | 0-00  | 0-00  | 0-00  | 0-00  | 0-00  |
|                           | Pregnancy, childbirth and perinatal period   | 0-18 | 0-00 | 0-00 | 0-00  | 0-00  | 0-00  | 0-00  | 0-00  | 0-00  | 0-00  | 0-00  | 0-00  | 0-00  | 0-00  | 0-00  | 0-00  |
| Established member states | Adverse effects of medical and surgical care | 0-00 | 0-00 | 0-00 | 0-00  | 0-00  | 0-00  | 0-00  | 0-00  | 0-00  | 0-00  | 0-00  | 0-00  | 0-00  | 0-00  | 0-00  | 0-00  |
|                           | Alcohol- related and drug related deaths     | 0-00 | 0-00 | 0-00 | 0-00  | 0-00  | 0-01  | 0-01  | 0-01  | 0-01  | 0-02  | 0-03  | 0-03  | 0-04  | 0-03  | 0-03  | 0-02  |
|                           | Cancer                                       | 0-00 | 0-00 | 0-00 | 0-00  | 0-00  | 0-00  | 0-01  | 0-02  | 0-04  | 0-06  | 0-10  | 0-15  | 0-19  | 0-24  | 0-25  | 0-26  |
|                           | Cardiovascular diseases                      | 0-00 | 0-00 | 0-00 | 0-00  | 0-00  | 0-00  | 0-00  | 0-00  | 0-01  | 0-01  | 0-02  | 0-03  | 0-04  | 0-06  | 0-09  | 0-13  |
|                           | Cerebrovascular diseases                     | 0-00 | 0-00 | 0-00 | 0-00  | 0-00  | 0-00  | 0-00  | 0-00  | 0-00  | 0-01  | 0-01  | 0-02  | 0-02  | 0-03  | 0-04  | 0-07  |
|                           | Congenital malformations                     | 0-03 | 0-00 | 0-00 | 0-00  | 0-00  | 0-00  | 0-00  | 0-00  | 0-00  | 0-00  | 0-00  | 0-00  | 0-00  | 0-00  | 0-00  | 0-00  |
|                           | Diseases of the digestive system             | 0-00 | 0-00 | 0-00 | 0-00  | 0-00  | 0-00  | 0-00  | 0-00  | 0-00  | 0-00  | 0-00  | 0-00  | 0-00  | 0-00  | 0-01  | 0-01  |
|                           | Diseases of the genitourinary system         | 0-00 | 0-00 | 0-00 | 0-00  | 0-00  | 0-00  | 0-00  | 0-00  | 0-00  | 0-00  | 0-00  | 0-00  | 0-00  | 0-00  | 0-01  | 0-01  |
|                           | Diseases of the nervous system               | 0-00 | 0-00 | 0-00 | 0-00  | 0-00  | 0-00  | 0-00  | 0-00  | 0-00  | 0-00  | 0-00  | 0-00  | 0-00  | 0-00  | 0-00  | 0-00  |
|                           | Diseases of the respiratory system           | 0-00 | 0-00 | 0-00 | 0-00  | 0-00  | 0-00  | 0-00  | 0-00  | 0-00  | 0-00  | 0-01  | 0-01  | 0-02  | 0-04  | 0-05  | 0-07  |
|                           | Endocrine and metabolic diseases             | 0-00 | 0-00 | 0-00 | 0-00  | 0-00  | 0-00  | 0-00  | 0-00  | 0-00  | 0-00  | 0-00  | 0-01  | 0-01  | 0-01  | 0-02  | 0-03  |

| Country           | Cause Group                                  | 0-1  | 1-4  | 5-9  | 10-14 | 15-19 | 20-24 | 25-29 | 30-34 | 35-39 | 40-44 | 45-49 | 50-54 | 55-59 | 60-64 | 65-69 | 70-74 |
|-------------------|----------------------------------------------|------|------|------|-------|-------|-------|-------|-------|-------|-------|-------|-------|-------|-------|-------|-------|
|                   | Infectious diseases                          | 0.00 | 0.00 | 0.00 | 0.00  | 0.00  | 0.00  | 0.00  | 0.00  | 0.00  | 0.00  | 0.00  | 0.01  | 0.01  | 0.01  | 0.01  | 0.01  |
|                   | Injuries                                     | 0.00 | 0.01 | 0.00 | 0.01  | 0.03  | 0.03  | 0.02  | 0.02  | 0.02  | 0.02  | 0.02  | 0.02  | 0.02  | 0.02  | 0.02  | 0.02  |
|                   | Nonavoidable deaths                          | 0.00 | 0.00 | 0.00 | 0.00  | 0.00  | 0.00  | 0.00  | 0.00  | 0.00  | 0.00  | 0.00  | 0.00  | 0.00  | 0.00  | 0.00  | 0.00  |
|                   | Pregnancy, childbirth and perinatal period   | 0.13 | 0.00 | 0.00 | 0.00  | 0.00  | 0.00  | 0.00  | 0.00  | 0.00  | 0.00  | 0.00  | 0.00  | 0.00  | 0.00  | 0.00  | 0.00  |
| New member states | Adverse effects of medical and surgical care | 0.00 | 0.00 | 0.00 | 0.00  | 0.00  | 0.00  | 0.00  | 0.00  | 0.00  | 0.00  | 0.00  | 0.00  | 0.00  | 0.00  | 0.00  | 0.00  |
|                   | Alcohol- related and drug related deaths     | 0.00 | 0.00 | 0.00 | 0.00  | 0.00  | 0.01  | 0.01  | 0.01  | 0.02  | 0.03  | 0.04  | 0.05  | 0.05  | 0.05  | 0.03  | 0.02  |
|                   | Cancer                                       | 0.00 | 0.00 | 0.00 | 0.00  | 0.00  | 0.00  | 0.01  | 0.02  | 0.04  | 0.07  | 0.11  | 0.17  | 0.21  | 0.24  | 0.24  | 0.23  |
|                   | Cardiovascular diseases                      | 0.00 | 0.00 | 0.00 | 0.00  | 0.00  | 0.00  | 0.00  | 0.00  | 0.01  | 0.02  | 0.04  | 0.06  | 0.10  | 0.16  | 0.23  | 0.33  |
|                   | Cerebrovascular diseases                     | 0.00 | 0.00 | 0.00 | 0.00  | 0.00  | 0.00  | 0.00  | 0.00  | 0.01  | 0.01  | 0.02  | 0.03  | 0.05  | 0.07  | 0.11  | 0.17  |
|                   | Congenital malformations                     | 0.05 | 0.00 | 0.00 | 0.00  | 0.00  | 0.00  | 0.00  | 0.00  | 0.00  | 0.00  | 0.00  | 0.00  | 0.00  | 0.00  | 0.00  | 0.00  |
|                   | Diseases of the digestive system             | 0.00 | 0.00 | 0.00 | 0.00  | 0.00  | 0.00  | 0.00  | 0.00  | 0.00  | 0.00  | 0.00  | 0.01  | 0.01  | 0.01  | 0.01  | 0.01  |
|                   | Diseases of the genitourinary system         | 0.00 | 0.00 | 0.00 | 0.00  | 0.00  | 0.00  | 0.00  | 0.00  | 0.00  | 0.00  | 0.00  | 0.00  | 0.00  | 0.01  | 0.01  | 0.01  |
|                   | Diseases of the nervous system               | 0.00 | 0.00 | 0.00 | 0.00  | 0.00  | 0.00  | 0.00  | 0.00  | 0.00  | 0.00  | 0.00  | 0.00  | 0.00  | 0.00  | 0.00  | 0.00  |
|                   | Diseases of the respiratory system           | 0.03 | 0.01 | 0.00 | 0.00  | 0.00  | 0.00  | 0.00  | 0.00  | 0.01  | 0.01  | 0.01  | 0.02  | 0.02  | 0.03  | 0.03  | 0.04  |
|                   | Endocrine and metabolic diseases             | 0.00 | 0.00 | 0.00 | 0.00  | 0.00  | 0.00  | 0.00  | 0.00  | 0.00  | 0.00  | 0.00  | 0.01  | 0.01  | 0.02  | 0.03  | 0.04  |
|                   | Infectious diseases                          | 0.01 | 0.00 | 0.00 | 0.00  | 0.00  | 0.00  | 0.00  | 0.00  | 0.01  | 0.01  | 0.01  | 0.01  | 0.01  | 0.01  | 0.01  | 0.01  |
|                   | Injuries                                     | 0.01 | 0.02 | 0.01 | 0.02  | 0.04  | 0.03  | 0.03  | 0.03  | 0.03  | 0.03  | 0.04  | 0.04  | 0.03  | 0.03  | 0.03  | 0.03  |
|                   | Nonavoidable deaths                          | 0.00 | 0.00 | 0.00 | 0.00  | 0.00  | 0.00  | 0.00  | 0.00  | 0.00  | 0.00  | 0.00  | 0.00  | 0.00  | 0.00  | 0.00  | 0.00  |
|                   | Pregnancy, childbirth and perinatal period   | 0.17 | 0.00 | 0.00 | 0.00  | 0.00  | 0.00  | 0.00  | 0.00  | 0.00  | 0.00  | 0.00  | 0.00  | 0.00  | 0.00  | 0.00  | 0.00  |

**Supplementary Table 7: The average contribution of cause groups to the estimated gains in male life expectancy by new member state if they were assigned average avoidable mortality rates observed across the established member states, 2005-2019**

| Country  | Cause Group                                  | 0-1  | 1-4  | 5-9  | 10-14 | 15-19 | 20-24 | 25-29 | 30-34 | 35-39 | 40-44 | 45-49 | 50-54 | 55-59 | 60-64 | 65-69 | 70-74 |      |
|----------|----------------------------------------------|------|------|------|-------|-------|-------|-------|-------|-------|-------|-------|-------|-------|-------|-------|-------|------|
| Bulgaria | Adverse effects of medical and surgical care | 0.00 | 0.00 | 0.00 | 0.00  | 0.00  | 0.00  | 0.00  | 0.00  | 0.00  | 0.00  | 0.00  | 0.00  | 0.00  | 0.00  | 0.00  | 0.00  |      |
|          | Alcohol- related and drug related deaths     | 0.00 | 0.00 | 0.00 | 0.00  | 0.00  | 0.00  | 0.00  | -0.01 | 0.00  | 0.00  | 0.01  | 0.02  | 0.03  | 0.04  | 0.03  | 0.02  | 0.01 |
|          | Cancer                                       | 0.00 | 0.00 | 0.00 | 0.00  | 0.00  | 0.00  | 0.00  | 0.00  | 0.01  | 0.01  | 0.03  | 0.05  | 0.08  | 0.10  | 0.09  | 0.07  | 0.02 |
|          | Cardiovascular diseases                      | 0.00 | 0.00 | 0.00 | 0.00  | 0.00  | 0.01  | 0.01  | 0.02  | 0.04  | 0.07  | 0.11  | 0.17  | 0.22  | 0.24  | 0.24  | 0.24  | 0.22 |
|          | Cerebrovascular diseases                     | 0.01 | 0.00 | 0.00 | 0.00  | 0.00  | 0.00  | 0.00  | 0.00  | 0.01  | 0.01  | 0.03  | 0.05  | 0.09  | 0.13  | 0.17  | 0.22  | 0.24 |
|          | Congenital malformations                     | 0.04 | 0.00 | 0.00 | 0.00  | 0.00  | 0.00  | 0.00  | 0.00  | 0.00  | 0.00  | 0.00  | 0.00  | 0.00  | 0.00  | 0.00  | 0.00  | 0.00 |
|          | Diseases of the digestive system             | 0.00 | 0.00 | 0.00 | 0.00  | 0.00  | 0.00  | 0.00  | 0.00  | 0.00  | 0.00  | 0.00  | 0.00  | 0.01  | 0.00  | 0.01  | 0.01  | 0.00 |
|          | Diseases of the genitourinary system         | 0.00 | 0.00 | 0.00 | 0.00  | 0.00  | 0.00  | 0.00  | 0.00  | 0.00  | 0.01  | 0.01  | 0.01  | 0.01  | 0.01  | 0.02  | 0.01  | 0.01 |
|          | Diseases of the nervous system               | 0.00 | 0.00 | 0.00 | 0.00  | 0.00  | 0.00  | 0.00  | 0.00  | 0.00  | 0.00  | 0.00  | 0.00  | 0.00  | 0.00  | 0.00  | 0.00  | 0.00 |
|          | Diseases of the respiratory system           | 0.07 | 0.02 | 0.01 | 0.01  | 0.01  | 0.01  | 0.01  | 0.01  | 0.01  | 0.01  | 0.01  | 0.02  | 0.02  | 0.02  | 0.02  | 0.01  | 0.00 |
|          | Endocrine and metabolic diseases             | 0.00 | 0.00 | 0.00 | 0.00  | 0.00  | 0.00  | 0.00  | 0.00  | 0.00  | 0.00  | 0.00  | 0.00  | 0.01  | 0.01  | 0.01  | 0.01  | 0.01 |
|          | Infectious diseases                          | 0.02 | 0.00 | 0.00 | 0.00  | 0.00  | 0.00  | 0.00  | 0.00  | 0.01  | 0.00  | 0.00  | 0.00  | 0.00  | 0.01  | 0.00  | 0.00  | 0.00 |
|          | Injuries                                     | 0.01 | 0.01 | 0.02 | 0.02  | 0.04  | 0.04  | 0.03  | 0.04  | 0.03  | 0.03  | 0.03  | 0.03  | 0.03  | 0.03  | 0.03  | 0.01  | 0.01 |
|          | Nonavoidable deaths                          | 0.00 | 0.00 | 0.00 | 0.00  | 0.00  | 0.00  | 0.00  | 0.00  | 0.00  | 0.00  | 0.00  | 0.00  | 0.00  | 0.00  | 0.00  | 0.00  | 0.00 |
|          | Pregnancy, childbirth and perinatal period   | 0.14 | 0.00 | 0.00 | 0.00  | 0.00  | 0.00  | 0.00  | 0.00  | 0.00  | 0.00  | 0.00  | 0.00  | 0.00  | 0.00  | 0.00  | 0.00  | 0.00 |
| Croatia  | Adverse effects of medical and surgical care | 0.00 | 0.00 | 0.00 | 0.00  | 0.00  | 0.00  | 0.00  | 0.00  | 0.00  | 0.00  | 0.00  | 0.00  | 0.00  | 0.00  | 0.00  | 0.00  |      |
|          | Alcohol- related and drug related deaths     | 0.00 | 0.00 | 0.00 | 0.00  | 0.00  | 0.00  | 0.00  | 0.01  | 0.01  | 0.02  | 0.03  | 0.05  | 0.06  | 0.05  | 0.05  | 0.04  |      |
|          | Cancer                                       | 0.00 | 0.00 | 0.00 | 0.00  | 0.00  | 0.00  | 0.00  | 0.01  | 0.01  | 0.02  | 0.05  | 0.10  | 0.15  | 0.17  | 0.16  | 0.13  |      |
|          | Cardiovascular diseases                      | 0.00 | 0.00 | 0.00 | 0.00  | 0.00  | 0.00  | 0.00  | 0.00  | 0.01  | 0.03  | 0.06  | 0.09  | 0.12  | 0.15  | 0.17  | 0.18  |      |
|          | Cerebrovascular diseases                     | 0.00 | 0.00 | 0.00 | 0.00  | 0.00  | 0.00  | 0.00  | 0.00  | 0.00  | 0.01  | 0.02  | 0.04  | 0.06  | 0.09  | 0.12  | 0.15  |      |



| Country                          | Cause Group                                  | 0-1   | 1-4  | 5-9  | 10-14 | 15-19 | 20-24 | 25-29 | 30-34 | 35-39 | 40-44 | 45-49 | 50-54 | 55-59 | 60-64 | 65-69 | 70-74 |       |
|----------------------------------|----------------------------------------------|-------|------|------|-------|-------|-------|-------|-------|-------|-------|-------|-------|-------|-------|-------|-------|-------|
| Cyprus                           | Congenital malformations                     | 0.01  | 0.00 | 0.00 | 0.00  | 0.00  | 0.00  | 0.00  | 0.00  | 0.00  | 0.00  | 0.00  | 0.00  | 0.00  | 0.00  | 0.00  | 0.00  |       |
|                                  | Diseases of the digestive system             | 0.00  | 0.00 | 0.00 | 0.00  | 0.00  | 0.00  | 0.00  | 0.00  | 0.00  | 0.00  | 0.00  | 0.01  | 0.01  | 0.01  | 0.01  | 0.01  |       |
|                                  | Diseases of the genitourinary system         | 0.00  | 0.00 | 0.00 | 0.00  | 0.00  | 0.00  | 0.00  | 0.00  | 0.00  | 0.00  | 0.00  | 0.00  | 0.00  | 0.00  | 0.00  | 0.00  | 0.00  |
|                                  | Diseases of the nervous system               | 0.00  | 0.00 | 0.00 | 0.00  | 0.00  | 0.00  | 0.00  | 0.00  | 0.00  | 0.00  | 0.00  | 0.00  | 0.00  | 0.00  | 0.00  | 0.00  | 0.00  |
|                                  | Diseases of the respiratory system           | 0.00  | 0.00 | 0.00 | 0.00  | 0.00  | 0.00  | 0.00  | 0.00  | 0.00  | 0.00  | 0.00  | 0.00  | 0.00  | 0.00  | 0.01  | 0.01  | 0.02  |
|                                  | Endocrine and metabolic diseases             | 0.00  | 0.00 | 0.00 | 0.00  | 0.00  | 0.00  | 0.00  | 0.00  | 0.00  | 0.00  | 0.00  | 0.00  | 0.01  | 0.01  | 0.02  | 0.02  | 0.03  |
|                                  | Infectious diseases                          | 0.00  | 0.00 | 0.00 | 0.00  | 0.00  | 0.00  | 0.00  | 0.00  | 0.00  | 0.00  | 0.00  | 0.00  | 0.00  | 0.00  | 0.00  | 0.00  | 0.00  |
|                                  | Injuries                                     | 0.00  | 0.00 | 0.01 | 0.01  | 0.04  | 0.06  | 0.04  | 0.03  | 0.04  | 0.03  | 0.05  | 0.05  | 0.05  | 0.05  | 0.04  | 0.03  | 0.03  |
|                                  | Nonavoidable deaths                          | 0.00  | 0.00 | 0.00 | 0.00  | 0.00  | 0.00  | 0.00  | 0.00  | 0.00  | 0.00  | 0.00  | 0.00  | 0.00  | 0.00  | 0.00  | 0.00  | 0.00  |
|                                  | Pregnancy, childbirth and perinatal period   | 0.05  | 0.00 | 0.00 | 0.00  | 0.00  | 0.00  | 0.00  | 0.00  | 0.00  | 0.00  | 0.00  | 0.00  | 0.00  | 0.00  | 0.00  | 0.00  | 0.00  |
|                                  | Adverse effects of medical and surgical care | 0.00  | 0.00 | 0.00 | 0.00  | 0.00  | 0.00  | 0.00  | 0.00  | 0.00  | 0.00  | 0.00  | 0.00  | 0.00  | 0.00  | 0.00  | 0.00  | 0.00  |
|                                  | Alcohol- related and drug related deaths     | 0.00  | 0.00 | 0.00 | 0.00  | 0.00  | 0.00  | 0.00  | -0.01 | -0.01 | -0.02 | -0.03 | -0.04 | -0.05 | -0.05 | -0.04 | -0.02 | -0.01 |
|                                  | Cancer                                       | 0.00  | 0.00 | 0.00 | 0.00  | 0.00  | 0.00  | 0.00  | 0.00  | 0.00  | 0.00  | -0.01 | -0.03 | -0.06 | -0.09 | -0.09 | -0.09 | -0.08 |
|                                  | Cardiovascular diseases                      | 0.00  | 0.00 | 0.00 | 0.00  | 0.00  | 0.00  | 0.00  | 0.00  | 0.01  | 0.02  | 0.04  | 0.04  | 0.05  | 0.05  | 0.05  | 0.04  | 0.04  |
|                                  | Cerebrovascular diseases                     | 0.00  | 0.00 | 0.00 | 0.00  | 0.00  | 0.00  | 0.00  | 0.00  | 0.00  | 0.00  | 0.00  | 0.00  | 0.00  | 0.00  | 0.00  | -0.01 | 0.00  |
|                                  | Congenital malformations                     | -0.01 | 0.00 | 0.00 | 0.00  | 0.00  | 0.00  | 0.00  | 0.00  | 0.00  | 0.00  | 0.00  | 0.00  | 0.00  | 0.00  | 0.00  | 0.00  | 0.00  |
|                                  | Diseases of the digestive system             | 0.00  | 0.00 | 0.00 | 0.00  | 0.00  | 0.00  | 0.00  | 0.00  | 0.00  | 0.00  | 0.00  | 0.00  | 0.00  | 0.00  | 0.00  | 0.00  | 0.00  |
|                                  | Diseases of the genitourinary system         | 0.00  | 0.00 | 0.00 | 0.00  | 0.00  | 0.00  | 0.00  | 0.00  | 0.00  | 0.00  | 0.00  | 0.00  | 0.00  | 0.01  | 0.01  | 0.01  | 0.01  |
|                                  | Diseases of the nervous system               | 0.00  | 0.00 | 0.00 | 0.00  | 0.00  | 0.00  | 0.00  | 0.00  | 0.00  | 0.00  | 0.00  | 0.00  | 0.00  | 0.00  | 0.00  | 0.00  | 0.00  |
|                                  | Diseases of the respiratory system           | 0.00  | 0.00 | 0.00 | 0.00  | 0.00  | 0.00  | 0.00  | 0.00  | 0.00  | 0.00  | 0.00  | 0.00  | -0.01 | -0.02 | -0.03 | -0.03 | -0.04 |
| Endocrine and metabolic diseases | 0.00                                         | 0.00  | 0.00 | 0.00 | 0.00  | 0.00  | 0.00  | 0.00  | 0.00  | 0.00  | 0.00  | 0.00  | 0.00  | 0.01  | 0.02  | 0.04  | 0.06  |       |
| Infectious diseases              | 0.00                                         | 0.00  | 0.00 | 0.00 | 0.00  | 0.00  | 0.00  | 0.00  | 0.00  | 0.00  | 0.00  | -0.01 | 0.00  | 0.00  | 0.00  | 0.00  | 0.00  |       |

| Country        | Cause Group                                  | 0-1   | 1-4  | 5-9  | 10-14 | 15-19 | 20-24 | 25-29 | 30-34 | 35-39 | 40-44 | 45-49 | 50-54 | 55-59 | 60-64 | 65-69 | 70-74 |      |
|----------------|----------------------------------------------|-------|------|------|-------|-------|-------|-------|-------|-------|-------|-------|-------|-------|-------|-------|-------|------|
| Czech Republic | Injuries                                     | 0.00  | 0.00 | 0.01 | 0.00  | 0.03  | 0.06  | 0.03  | 0.03  | 0.02  | 0.01  | 0.00  | -0.01 | -0.01 | 0.00  | 0.00  | 0.00  |      |
|                | Nonavoidable deaths                          | 0.04  | 0.01 | 0.01 | 0.00  | 0.00  | 0.00  | 0.01  | 0.01  | 0.01  | 0.02  | 0.05  | 0.09  | 0.11  | 0.10  | 0.08  | 0.05  |      |
|                | Pregnancy, childbirth and perinatal period   | -0.01 | 0.00 | 0.00 | 0.00  | 0.00  | 0.00  | 0.00  | 0.00  | 0.00  | 0.00  | 0.00  | 0.00  | 0.00  | 0.00  | 0.00  | 0.00  | 0.00 |
|                | Adverse effects of medical and surgical care | 0.00  | 0.00 | 0.00 | 0.00  | 0.00  | 0.00  | 0.00  | 0.00  | 0.00  | 0.00  | 0.00  | 0.00  | 0.00  | 0.00  | 0.00  | 0.00  | 0.00 |
|                | Alcohol- related and drug related deaths     | 0.00  | 0.00 | 0.00 | 0.00  | 0.00  | -0.01 | -0.01 | -0.01 | 0.00  | 0.01  | 0.02  | 0.03  | 0.03  | 0.03  | 0.03  | 0.01  | 0.00 |
|                | Cancer                                       | 0.00  | 0.00 | 0.00 | 0.00  | 0.00  | 0.00  | 0.00  | 0.00  | 0.00  | 0.00  | 0.01  | 0.02  | 0.05  | 0.09  | 0.10  | 0.10  | 0.07 |
|                | Cardiovascular diseases                      | 0.00  | 0.00 | 0.00 | 0.00  | 0.00  | 0.00  | 0.00  | 0.00  | 0.01  | 0.02  | 0.04  | 0.08  | 0.13  | 0.20  | 0.23  | 0.25  |      |
|                | Cerebrovascular diseases                     | 0.00  | 0.00 | 0.00 | 0.00  | 0.00  | 0.00  | 0.00  | 0.00  | 0.00  | 0.00  | 0.01  | 0.01  | 0.02  | 0.04  | 0.05  | 0.06  |      |
|                | Congenital malformations                     | -0.01 | 0.00 | 0.00 | 0.00  | 0.00  | 0.00  | 0.00  | 0.00  | 0.00  | 0.00  | 0.00  | 0.00  | 0.00  | 0.00  | 0.00  | 0.00  | 0.00 |
|                | Diseases of the digestive system             | 0.00  | 0.00 | 0.00 | 0.00  | 0.00  | 0.00  | 0.00  | 0.00  | 0.00  | 0.00  | 0.01  | 0.01  | 0.01  | 0.01  | 0.01  | 0.01  | 0.01 |
|                | Diseases of the genitourinary system         | 0.00  | 0.00 | 0.00 | 0.00  | 0.00  | 0.00  | 0.00  | 0.00  | 0.00  | 0.00  | 0.00  | 0.00  | 0.00  | 0.00  | 0.00  | 0.00  | 0.00 |
|                | Diseases of the nervous system               | 0.00  | 0.00 | 0.00 | 0.00  | 0.00  | 0.00  | 0.00  | 0.00  | 0.00  | 0.00  | 0.00  | 0.00  | 0.00  | 0.00  | 0.00  | 0.00  | 0.00 |
|                | Diseases of the respiratory system           | 0.00  | 0.00 | 0.00 | 0.00  | 0.00  | 0.00  | 0.00  | 0.00  | 0.00  | 0.01  | 0.01  | 0.02  | 0.02  | 0.03  | 0.03  | 0.03  |      |
|                | Endocrine and metabolic diseases             | 0.00  | 0.00 | 0.00 | 0.00  | 0.00  | 0.00  | 0.00  | 0.00  | 0.00  | 0.00  | 0.00  | 0.00  | 0.01  | 0.01  | 0.02  | 0.02  |      |
|                | Infectious diseases                          | 0.00  | 0.00 | 0.00 | 0.00  | 0.00  | 0.00  | 0.00  | 0.00  | 0.00  | 0.00  | 0.00  | 0.00  | 0.00  | 0.00  | 0.00  | 0.00  | 0.00 |
| Estonia        | Injuries                                     | 0.00  | 0.00 | 0.00 | 0.01  | 0.03  | 0.05  | 0.04  | 0.04  | 0.04  | 0.05  | 0.05  | 0.06  | 0.05  | 0.04  | 0.03  | 0.02  |      |
|                | Nonavoidable deaths                          | 0.03  | 0.00 | 0.00 | 0.00  | 0.00  | 0.00  | 0.00  | 0.00  | 0.00  | 0.00  | 0.00  | 0.00  | 0.00  | 0.00  | 0.00  | 0.00  |      |
|                | Pregnancy, childbirth and perinatal period   | -0.03 | 0.00 | 0.00 | 0.00  | 0.00  | 0.00  | 0.00  | 0.00  | 0.00  | 0.00  | 0.00  | 0.00  | 0.00  | 0.00  | 0.00  | 0.00  |      |
|                | Adverse effects of medical and surgical care | 0.00  | 0.00 | 0.00 | 0.00  | 0.00  | 0.00  | 0.00  | 0.00  | 0.00  | 0.00  | 0.00  | 0.00  | 0.00  | 0.00  | 0.00  | 0.00  |      |
|                | Alcohol- related and drug related deaths     | 0.00  | 0.00 | 0.00 | 0.00  | 0.01  | 0.07  | 0.15  | 0.16  | 0.12  | 0.14  | 0.16  | 0.19  | 0.16  | 0.12  | 0.07  | 0.03  |      |
|                | Cancer                                       | 0.00  | 0.00 | 0.00 | 0.00  | 0.00  | 0.00  | 0.00  | 0.00  | 0.01  | 0.01  | 0.02  | 0.03  | 0.07  | 0.11  | 0.12  | 0.11  |      |
|                | Cardiovascular diseases                      | 0.00  | 0.00 | 0.00 | 0.00  | 0.00  | 0.00  | 0.00  | 0.01  | 0.02  | 0.04  | 0.10  | 0.17  | 0.27  | 0.37  | 0.41  | 0.43  |      |

| Country                            | Cause Group                                  | 0-1   | 1-4  | 5-9  | 10-14 | 15-19 | 20-24 | 25-29 | 30-34 | 35-39 | 40-44 | 45-49 | 50-54 | 55-59 | 60-64 | 65-69 | 70-74 |      |
|------------------------------------|----------------------------------------------|-------|------|------|-------|-------|-------|-------|-------|-------|-------|-------|-------|-------|-------|-------|-------|------|
| Hungary                            | Cerebrovascular diseases                     | 0-00  | 0-00 | 0-00 | 0-00  | 0-00  | 0-00  | 0-00  | 0-01  | 0-01  | 0-02  | 0-02  | 0-03  | 0-05  | 0-07  | 0-09  | 0-08  |      |
|                                    | Congenital malformations                     | 0-01  | 0-00 | 0-00 | 0-00  | 0-00  | 0-00  | 0-00  | 0-00  | 0-00  | 0-00  | 0-00  | 0-00  | 0-00  | 0-00  | 0-00  | 0-00  | 0-00 |
|                                    | Diseases of the digestive system             | 0-00  | 0-00 | 0-00 | 0-00  | 0-00  | 0-00  | 0-00  | 0-00  | 0-01  | 0-01  | 0-01  | 0-01  | 0-02  | 0-02  | 0-01  | 0-01  | 0-01 |
|                                    | Diseases of the genitourinary system         | 0-00  | 0-00 | 0-00 | 0-00  | 0-00  | 0-00  | 0-00  | 0-00  | 0-00  | 0-00  | 0-00  | 0-00  | 0-00  | 0-00  | 0-00  | 0-00  | 0-00 |
|                                    | Diseases of the nervous system               | 0-00  | 0-00 | 0-00 | 0-00  | 0-00  | 0-00  | 0-00  | 0-00  | 0-00  | 0-00  | 0-01  | 0-01  | 0-01  | 0-01  | 0-01  | 0-00  | 0-00 |
|                                    | Diseases of the respiratory system           | 0-00  | 0-00 | 0-00 | 0-00  | 0-00  | 0-00  | 0-00  | 0-00  | 0-01  | 0-01  | 0-02  | 0-03  | 0-03  | 0-03  | 0-02  | 0-02  | 0-00 |
|                                    | Endocrine and metabolic diseases             | 0-00  | 0-00 | 0-00 | 0-00  | 0-00  | 0-00  | 0-00  | 0-00  | 0-00  | 0-00  | 0-00  | 0-01  | 0-01  | 0-00  | 0-00  | 0-00  | 0-00 |
|                                    | Infectious diseases                          | 0-00  | 0-00 | 0-00 | 0-00  | 0-00  | 0-01  | 0-04  | 0-04  | 0-03  | 0-02  | 0-01  | 0-01  | 0-01  | 0-01  | 0-00  | 0-00  | 0-00 |
|                                    | Injuries                                     | 0-02  | 0-01 | 0-02 | 0-02  | 0-07  | 0-13  | 0-12  | 0-11  | 0-12  | 0-13  | 0-14  | 0-15  | 0-13  | 0-09  | 0-06  | 0-03  |      |
|                                    | Nonavoidable deaths                          | 0-02  | 0-00 | 0-00 | 0-00  | 0-00  | 0-00  | 0-00  | 0-00  | 0-00  | 0-00  | 0-00  | 0-00  | 0-00  | 0-00  | 0-00  | 0-00  | 0-00 |
|                                    | Pregnancy, childbirth and perinatal period   | -0-03 | 0-00 | 0-00 | 0-00  | 0-00  | 0-00  | 0-00  | 0-00  | 0-00  | 0-00  | 0-00  | 0-00  | 0-00  | 0-00  | 0-00  | 0-00  | 0-00 |
|                                    | Adverse effects of medical and surgical care | 0-00  | 0-00 | 0-00 | 0-00  | 0-00  | 0-00  | 0-00  | 0-00  | 0-00  | 0-00  | 0-00  | 0-00  | 0-00  | 0-00  | 0-00  | 0-00  | 0-00 |
|                                    | Alcohol- related and drug related deaths     | 0-00  | 0-00 | 0-00 | 0-00  | 0-00  | -0-01 | 0-00  | 0-00  | 0-02  | 0-06  | 0-11  | 0-14  | 0-13  | 0-11  | 0-08  | 0-04  |      |
|                                    | Cancer                                       | 0-00  | 0-00 | 0-00 | 0-00  | 0-00  | 0-00  | 0-00  | 0-01  | 0-01  | 0-04  | 0-11  | 0-21  | 0-29  | 0-28  | 0-22  | 0-14  |      |
|                                    | Cardiovascular diseases                      | 0-00  | 0-00 | 0-00 | 0-00  | 0-00  | 0-00  | 0-00  | 0-01  | 0-02  | 0-06  | 0-12  | 0-20  | 0-27  | 0-32  | 0-34  | 0-34  |      |
|                                    | Cerebrovascular diseases                     | 0-00  | 0-00 | 0-00 | 0-00  | 0-00  | 0-00  | 0-00  | 0-00  | 0-01  | 0-02  | 0-03  | 0-05  | 0-07  | 0-09  | 0-10  | 0-11  |      |
|                                    | Congenital malformations                     | 0-02  | 0-00 | 0-00 | 0-00  | 0-00  | 0-00  | 0-00  | 0-00  | 0-00  | 0-00  | 0-00  | 0-00  | 0-00  | 0-00  | 0-00  | 0-00  | 0-00 |
|                                    | Diseases of the digestive system             | 0-00  | 0-00 | 0-00 | 0-00  | 0-00  | 0-00  | 0-00  | 0-00  | 0-00  | 0-01  | 0-01  | 0-02  | 0-02  | 0-02  | 0-02  | 0-02  | 0-01 |
|                                    | Diseases of the genitourinary system         | 0-00  | 0-00 | 0-00 | 0-00  | 0-00  | 0-00  | 0-00  | 0-00  | 0-00  | 0-00  | 0-00  | 0-00  | 0-00  | 0-00  | 0-00  | 0-00  | 0-00 |
|                                    | Diseases of the nervous system               | 0-00  | 0-00 | 0-00 | 0-00  | 0-00  | 0-00  | 0-00  | 0-00  | 0-00  | 0-00  | 0-00  | 0-00  | 0-00  | 0-00  | 0-00  | 0-00  | 0-00 |
| Diseases of the respiratory system | 0-00                                         | 0-00  | 0-00 | 0-00 | 0-00  | 0-00  | 0-00  | 0-00  | 0-01  | 0-01  | 0-03  | 0-04  | 0-05  | 0-06  | 0-05  | 0-04  |       |      |
| Endocrine and metabolic diseases   | 0-00                                         | 0-00  | 0-00 | 0-00 | 0-00  | 0-00  | 0-00  | 0-00  | 0-00  | 0-00  | 0-01  | 0-01  | 0-02  | 0-02  | 0-02  | 0-02  | 0-02  |      |

| Country                                      | Cause Group                                  | 0-1                 | 1-4  | 5-9  | 10-14 | 15-19 | 20-24 | 25-29 | 30-34 | 35-39 | 40-44 | 45-49 | 50-54 | 55-59 | 60-64 | 65-69 | 70-74 |      |
|----------------------------------------------|----------------------------------------------|---------------------|------|------|-------|-------|-------|-------|-------|-------|-------|-------|-------|-------|-------|-------|-------|------|
| Latvia                                       | Infectious diseases                          | 0-00                | 0-00 | 0-00 | 0-00  | 0-00  | 0-00  | 0-00  | 0-00  | 0-00  | 0-00  | 0-00  | 0-00  | 0-00  | 0-00  | 0-00  | 0-00  |      |
|                                              | Injuries                                     | 0-00                | 0-00 | 0-00 | 0-01  | 0-01  | 0-02  | 0-03  | 0-04  | 0-05  | 0-07  | 0-09  | 0-09  | 0-08  | 0-06  | 0-04  | 0-03  |      |
|                                              | Nonavoidable deaths                          | 0-00                | 0-00 | 0-00 | 0-00  | 0-00  | 0-00  | 0-00  | 0-00  | 0-00  | 0-00  | 0-00  | 0-00  | 0-00  | 0-00  | 0-00  | 0-00  |      |
|                                              | Pregnancy, childbirth and perinatal period   | 0-07                | 0-00 | 0-00 | 0-00  | 0-00  | 0-00  | 0-00  | 0-00  | 0-00  | 0-00  | 0-00  | 0-00  | 0-00  | 0-00  | 0-00  | 0-00  |      |
|                                              | Adverse effects of medical and surgical care | 0-00                | 0-00 | 0-00 | 0-00  | 0-00  | 0-00  | 0-00  | 0-00  | 0-00  | 0-00  | 0-00  | 0-00  | 0-00  | 0-00  | 0-00  | 0-00  |      |
|                                              | Alcohol- related and drug related deaths     | 0-00                | 0-00 | 0-00 | 0-00  | 0-00  | 0-02  | 0-05  | 0-09  | 0-12  | 0-15  | 0-16  | 0-15  | 0-11  | 0-09  | 0-05  | 0-02  |      |
|                                              | Cancer                                       | 0-00                | 0-00 | 0-00 | 0-00  | 0-00  | 0-00  | 0-00  | 0-01  | 0-01  | 0-02  | 0-03  | 0-07  | 0-11  | 0-14  | 0-13  | 0-11  |      |
|                                              | Cardiovascular diseases                      | 0-00                | 0-00 | 0-00 | 0-00  | 0-00  | 0-00  | 0-00  | 0-02  | 0-04  | 0-09  | 0-15  | 0-26  | 0-36  | 0-45  | 0-47  | 0-42  |      |
|                                              | Cerebrovascular diseases                     | 0-00                | 0-00 | 0-00 | 0-00  | 0-00  | 0-00  | 0-00  | 0-01  | 0-01  | 0-02  | 0-04  | 0-07  | 0-11  | 0-16  | 0-19  | 0-20  |      |
|                                              | Congenital malformations                     | 0-02                | 0-00 | 0-00 | 0-00  | 0-00  | 0-00  | 0-00  | 0-00  | 0-00  | 0-00  | 0-00  | 0-00  | 0-00  | 0-00  | 0-00  | 0-00  |      |
|                                              | Diseases of the digestive system             | 0-00                | 0-00 | 0-00 | 0-00  | 0-00  | 0-00  | 0-01  | 0-01  | 0-01  | 0-02  | 0-02  | 0-02  | 0-02  | 0-02  | 0-01  | 0-01  |      |
|                                              | Diseases of the genitourinary system         | 0-00                | 0-00 | 0-00 | 0-00  | 0-00  | 0-00  | 0-00  | 0-00  | 0-00  | 0-00  | 0-00  | 0-00  | 0-00  | 0-01  | 0-01  | 0-00  |      |
|                                              | Diseases of the nervous system               | 0-00                | 0-00 | 0-00 | 0-00  | 0-00  | 0-00  | 0-00  | 0-00  | 0-01  | 0-01  | 0-01  | 0-01  | 0-00  | 0-00  | 0-00  | 0-00  |      |
|                                              | Diseases of the respiratory system           | 0-01                | 0-00 | 0-00 | 0-00  | 0-00  | 0-00  | 0-01  | 0-02  | 0-02  | 0-04  | 0-04  | 0-04  | 0-04  | 0-04  | 0-02  | 0-00  |      |
|                                              | Endocrine and metabolic diseases             | 0-00                | 0-00 | 0-00 | 0-00  | 0-00  | 0-00  | 0-00  | 0-00  | 0-00  | 0-01  | 0-00  | 0-01  | 0-01  | 0-01  | 0-01  | 0-00  |      |
|                                              | Lithuania                                    | Infectious diseases | 0-00 | 0-00 | 0-00  | 0-00  | 0-00  | 0-00  | 0-02  | 0-03  | 0-04  | 0-04  | 0-03  | 0-03  | 0-02  | 0-01  | 0-01  | 0-00 |
|                                              |                                              | Injuries            | 0-01 | 0-02 | 0-03  | 0-02  | 0-09  | 0-13  | 0-17  | 0-17  | 0-19  | 0-21  | 0-21  | 0-19  | 0-16  | 0-11  | 0-07  | 0-03 |
| Nonavoidable deaths                          |                                              | 0-01                | 0-00 | 0-00 | 0-00  | 0-00  | 0-00  | 0-00  | 0-00  | 0-00  | 0-00  | 0-00  | 0-00  | 0-00  | 0-00  | 0-00  | 0-00  |      |
| Pregnancy, childbirth and perinatal period   |                                              | 0-07                | 0-00 | 0-00 | 0-00  | 0-00  | 0-00  | 0-00  | 0-00  | 0-00  | 0-00  | 0-00  | 0-00  | 0-00  | 0-00  | 0-00  | 0-00  |      |
| Adverse effects of medical and surgical care |                                              | 0-00                | 0-00 | 0-00 | 0-00  | 0-00  | 0-00  | 0-00  | 0-00  | 0-00  | 0-00  | 0-00  | 0-00  | 0-00  | 0-00  | 0-00  | 0-00  |      |
| Alcohol- related and drug related deaths     |                                              | 0-00                | 0-00 | 0-00 | 0-00  | 0-00  | 0-02  | 0-05  | 0-09  | 0-13  | 0-14  | 0-14  | 0-13  | 0-09  | 0-07  | 0-03  | 0-01  |      |
| Cancer                                       |                                              | 0-00                | 0-00 | 0-00 | 0-00  | 0-00  | 0-00  | 0-00  | 0-01  | 0-01  | 0-02  | 0-04  | 0-07  | 0-11  | 0-14  | 0-13  | 0-08  |      |

| Country                            | Cause Group                                  | 0-1  | 1-4  | 5-9  | 10-14 | 15-19 | 20-24 | 25-29 | 30-34 | 35-39 | 40-44 | 45-49 | 50-54 | 55-59 | 60-64 | 65-69 | 70-74 |       |
|------------------------------------|----------------------------------------------|------|------|------|-------|-------|-------|-------|-------|-------|-------|-------|-------|-------|-------|-------|-------|-------|
| Malta                              | Cardiovascular diseases                      | 0.00 | 0.00 | 0.00 | 0.00  | 0.00  | 0.00  | 0.01  | 0.03  | 0.05  | 0.09  | 0.16  | 0.24  | 0.35  | 0.45  | 0.47  | 0.43  |       |
|                                    | Cerebrovascular diseases                     | 0.00 | 0.00 | 0.00 | 0.00  | 0.00  | 0.00  | 0.00  | 0.01  | 0.02  | 0.02  | 0.04  | 0.05  | 0.08  | 0.11  | 0.14  | 0.13  |       |
|                                    | Congenital malformations                     | 0.02 | 0.00 | 0.00 | 0.00  | 0.00  | 0.00  | 0.00  | 0.00  | 0.00  | 0.00  | 0.00  | 0.00  | 0.00  | 0.00  | 0.00  | 0.00  | 0.00  |
|                                    | Diseases of the digestive system             | 0.00 | 0.00 | 0.00 | 0.00  | 0.00  | 0.00  | 0.01  | 0.01  | 0.02  | 0.02  | 0.02  | 0.02  | 0.02  | 0.02  | 0.02  | 0.02  | 0.01  |
|                                    | Diseases of the genitourinary system         | 0.00 | 0.00 | 0.00 | 0.00  | 0.00  | 0.00  | 0.00  | 0.00  | 0.00  | 0.00  | 0.00  | 0.00  | 0.00  | 0.00  | 0.00  | 0.00  | 0.00  |
|                                    | Diseases of the nervous system               | 0.00 | 0.00 | 0.00 | 0.00  | 0.00  | 0.00  | 0.00  | 0.00  | 0.01  | 0.01  | 0.01  | 0.01  | 0.01  | 0.00  | 0.00  | 0.00  | 0.00  |
|                                    | Diseases of the respiratory system           | 0.01 | 0.00 | 0.00 | 0.00  | 0.00  | 0.00  | 0.01  | 0.02  | 0.02  | 0.03  | 0.04  | 0.04  | 0.05  | 0.05  | 0.04  | 0.02  |       |
|                                    | Endocrine and metabolic diseases             | 0.00 | 0.00 | 0.00 | 0.00  | 0.00  | 0.00  | 0.00  | 0.00  | 0.00  | 0.00  | 0.01  | 0.00  | 0.00  | 0.00  | 0.00  | 0.00  | 0.00  |
|                                    | Infectious diseases                          | 0.00 | 0.00 | 0.00 | 0.00  | 0.00  | 0.00  | 0.01  | 0.03  | 0.03  | 0.04  | 0.03  | 0.03  | 0.03  | 0.03  | 0.02  | 0.02  | 0.01  |
|                                    | Injuries                                     | 0.02 | 0.02 | 0.03 | 0.03  | 0.13  | 0.21  | 0.22  | 0.24  | 0.26  | 0.26  | 0.27  | 0.26  | 0.22  | 0.17  | 0.10  | 0.05  |       |
|                                    | Nonavoidable deaths                          | 0.01 | 0.00 | 0.00 | 0.00  | 0.00  | 0.00  | 0.00  | 0.00  | 0.00  | 0.00  | 0.00  | 0.00  | 0.00  | 0.00  | 0.00  | 0.00  | 0.00  |
|                                    | Pregnancy, childbirth and perinatal period   | 0.00 | 0.00 | 0.00 | 0.00  | 0.00  | 0.00  | 0.00  | 0.00  | 0.00  | 0.00  | 0.00  | 0.00  | 0.00  | 0.00  | 0.00  | 0.00  | 0.00  |
|                                    | Adverse effects of medical and surgical care | 0.00 | 0.00 | 0.00 | 0.00  | 0.00  | 0.00  | 0.00  | 0.00  | 0.00  | 0.00  | 0.00  | 0.00  | 0.00  | 0.00  | 0.00  | 0.00  | 0.00  |
|                                    | Alcohol- related and drug related deaths     | 0.00 | 0.00 | 0.00 | 0.00  | 0.00  | 0.00  | 0.00  | 0.00  | 0.00  | -0.02 | -0.03 | -0.03 | -0.05 | -0.04 | -0.04 | -0.02 | -0.01 |
|                                    | Cancer                                       | 0.00 | 0.00 | 0.00 | 0.00  | 0.00  | 0.01  | 0.00  | 0.00  | 0.00  | 0.00  | -0.01 | -0.03 | -0.04 | -0.05 | -0.04 | -0.04 | -0.01 |
|                                    | Cardiovascular diseases                      | 0.00 | 0.00 | 0.00 | 0.00  | 0.00  | 0.00  | 0.00  | 0.01  | 0.01  | 0.01  | 0.01  | 0.03  | 0.04  | 0.05  | 0.10  | 0.12  |       |
|                                    | Cerebrovascular diseases                     | 0.01 | 0.00 | 0.00 | 0.00  | 0.00  | 0.00  | 0.00  | 0.00  | 0.00  | 0.00  | -0.01 | 0.00  | 0.00  | 0.00  | 0.01  | 0.01  |       |
|                                    | Congenital malformations                     | 0.04 | 0.00 | 0.00 | 0.00  | 0.00  | 0.00  | 0.00  | 0.00  | 0.00  | 0.00  | 0.00  | 0.00  | 0.00  | 0.00  | 0.00  | 0.00  | 0.00  |
|                                    | Diseases of the digestive system             | 0.00 | 0.00 | 0.00 | 0.00  | 0.00  | 0.00  | 0.00  | 0.00  | 0.00  | 0.00  | 0.00  | 0.00  | 0.00  | 0.00  | 0.00  | 0.00  | 0.00  |
|                                    | Diseases of the genitourinary system         | 0.00 | 0.00 | 0.00 | 0.00  | 0.00  | 0.00  | 0.00  | 0.00  | 0.00  | 0.00  | 0.00  | 0.00  | 0.00  | 0.00  | 0.00  | 0.00  | 0.01  |
| Diseases of the nervous system     | 0.00                                         | 0.00 | 0.00 | 0.00 | 0.00  | 0.00  | 0.00  | 0.00  | 0.00  | 0.00  | 0.00  | 0.00  | 0.00  | 0.00  | 0.00  | 0.00  | 0.00  |       |
| Diseases of the respiratory system | 0.01                                         | 0.00 | 0.00 | 0.00 | 0.01  | 0.00  | 0.00  | 0.00  | 0.00  | 0.00  | 0.00  | 0.00  | 0.00  | -0.02 | -0.01 | 0.00  | 0.01  |       |

| Country                                      | Cause Group                                  | 0-1   | 1-4  | 5-9   | 10-14 | 15-19 | 20-24 | 25-29 | 30-34 | 35-39 | 40-44 | 45-49 | 50-54 | 55-59 | 60-64 | 65-69 | 70-74 |
|----------------------------------------------|----------------------------------------------|-------|------|-------|-------|-------|-------|-------|-------|-------|-------|-------|-------|-------|-------|-------|-------|
| Poland                                       | Endocrine and metabolic diseases             | 0.00  | 0.00 | 0.00  | 0.00  | 0.00  | 0.00  | 0.00  | 0.00  | 0.00  | 0.00  | 0.01  | 0.01  | 0.01  | 0.02  | 0.02  | 0.02  |
|                                              | Infectious diseases                          | 0.00  | 0.00 | 0.00  | 0.00  | 0.00  | 0.00  | 0.00  | 0.00  | 0.00  | -0.01 | -0.01 | -0.01 | -0.01 | -0.01 | -0.01 | -0.01 |
|                                              | Injuries                                     | -0.01 | 0.00 | -0.01 | 0.00  | -0.01 | -0.03 | -0.01 | 0.00  | 0.00  | 0.01  | -0.02 | -0.01 | -0.01 | -0.01 | -0.01 | -0.01 |
|                                              | Nonavoidable deaths                          | 0.00  | 0.02 | 0.01  | 0.01  | 0.02  | 0.03  | 0.02  | 0.02  | 0.02  | 0.04  | 0.07  | 0.08  | 0.09  | 0.05  | 0.02  | 0.01  |
|                                              | Pregnancy, childbirth and perinatal period   | 0.08  | 0.00 | 0.00  | 0.00  | 0.00  | 0.00  | 0.00  | 0.00  | 0.00  | 0.00  | 0.00  | 0.00  | 0.00  | 0.00  | 0.00  | 0.00  |
|                                              | Adverse effects of medical and surgical care | 0.00  | 0.00 | 0.00  | 0.00  | 0.00  | 0.00  | 0.00  | 0.00  | 0.00  | 0.00  | 0.00  | 0.00  | 0.00  | 0.00  | 0.00  | 0.00  |
|                                              | Alcohol- related and drug related deaths     | 0.00  | 0.00 | 0.00  | 0.00  | 0.00  | 0.00  | 0.00  | 0.00  | 0.02  | 0.03  | 0.05  | 0.06  | 0.06  | 0.05  | 0.04  | 0.02  |
|                                              | Cancer                                       | 0.00  | 0.00 | 0.00  | 0.00  | 0.00  | 0.00  | 0.00  | 0.00  | 0.00  | 0.01  | 0.03  | 0.06  | 0.11  | 0.14  | 0.15  | 0.12  |
|                                              | Cardiovascular diseases                      | 0.00  | 0.00 | 0.00  | 0.00  | 0.00  | 0.00  | 0.00  | 0.00  | 0.01  | 0.02  | 0.04  | 0.08  | 0.11  | 0.14  | 0.15  | 0.16  |
|                                              | Cerebrovascular diseases                     | 0.00  | 0.00 | 0.00  | 0.00  | 0.00  | 0.00  | 0.00  | 0.00  | 0.01  | 0.02  | 0.03  | 0.04  | 0.05  | 0.07  | 0.08  | 0.08  |
|                                              | Congenital malformations                     | 0.03  | 0.01 | 0.00  | 0.00  | 0.00  | 0.00  | 0.00  | 0.00  | 0.00  | 0.00  | 0.00  | 0.00  | 0.00  | 0.00  | 0.00  | 0.00  |
|                                              | Diseases of the digestive system             | 0.00  | 0.00 | 0.00  | 0.00  | 0.00  | 0.00  | 0.00  | 0.00  | 0.01  | 0.01  | 0.01  | 0.01  | 0.01  | 0.01  | 0.01  | 0.01  |
|                                              | Diseases of the genitourinary system         | 0.00  | 0.00 | 0.00  | 0.00  | 0.00  | 0.00  | 0.00  | 0.00  | 0.00  | 0.00  | 0.00  | 0.00  | 0.00  | 0.00  | 0.00  | 0.00  |
|                                              | Diseases of the nervous system               | 0.00  | 0.00 | 0.00  | 0.00  | 0.00  | 0.00  | 0.00  | 0.00  | 0.00  | 0.00  | 0.00  | 0.00  | 0.00  | 0.00  | 0.00  | 0.00  |
|                                              | Diseases of the respiratory system           | 0.01  | 0.00 | 0.00  | 0.00  | 0.00  | 0.00  | 0.00  | 0.00  | 0.00  | 0.01  | 0.01  | 0.01  | 0.02  | 0.02  | 0.02  | 0.03  |
|                                              | Endocrine and metabolic diseases             | 0.00  | 0.00 | 0.00  | 0.00  | 0.00  | 0.00  | 0.00  | 0.00  | 0.00  | 0.00  | 0.00  | 0.01  | 0.01  | 0.01  | 0.01  | 0.01  |
|                                              | Infectious diseases                          | 0.00  | 0.00 | 0.00  | 0.00  | 0.00  | 0.00  | 0.00  | 0.00  | 0.00  | 0.00  | 0.00  | 0.00  | 0.00  | 0.00  | 0.00  | 0.00  |
|                                              | Injuries                                     | 0.00  | 0.00 | 0.01  | 0.01  | 0.06  | 0.09  | 0.07  | 0.07  | 0.08  | 0.08  | 0.09  | 0.09  | 0.07  | 0.05  | 0.03  | 0.02  |
|                                              | Nonavoidable deaths                          | 0.00  | 0.00 | 0.00  | 0.00  | 0.00  | 0.00  | 0.00  | 0.00  | 0.00  | 0.00  | 0.00  | 0.00  | 0.00  | 0.00  | 0.00  | 0.00  |
| Pregnancy, childbirth and perinatal period   | 0.06                                         | 0.00  | 0.00 | 0.00  | 0.00  | 0.00  | 0.00  | 0.00  | 0.00  | 0.00  | 0.00  | 0.00  | 0.00  | 0.00  | 0.00  | 0.00  |       |
| Adverse effects of medical and surgical care | 0.00                                         | 0.00  | 0.00 | 0.00  | 0.00  | 0.00  | 0.00  | 0.00  | 0.00  | 0.00  | 0.00  | 0.00  | 0.00  | 0.00  | 0.00  | 0.00  |       |
| Alcohol- related and drug related deaths     | 0.00                                         | 0.00  | 0.00 | 0.00  | 0.00  | -0.01 | -0.01 | 0.00  | 0.01  | 0.03  | 0.06  | 0.09  | 0.09  | 0.09  | 0.07  | 0.05  |       |
| Romania                                      |                                              |       |      |       |       |       |       |       |       |       |       |       |       |       |       |       |       |

| Country                              | Cause Group                                  | 0-1  | 1-4  | 5-9  | 10-14 | 15-19 | 20-24 | 25-29 | 30-34 | 35-39 | 40-44 | 45-49 | 50-54 | 55-59 | 60-64 | 65-69 | 70-74 |      |
|--------------------------------------|----------------------------------------------|------|------|------|-------|-------|-------|-------|-------|-------|-------|-------|-------|-------|-------|-------|-------|------|
| Slovakia                             | Cancer                                       | 0.00 | 0.00 | 0.00 | 0.00  | 0.00  | 0.00  | 0.00  | 0.01  | 0.01  | 0.04  | 0.08  | 0.13  | 0.17  | 0.15  | 0.11  | 0.06  |      |
|                                      | Cardiovascular diseases                      | 0.00 | 0.00 | 0.00 | 0.00  | 0.00  | 0.01  | 0.01  | 0.02  | 0.03  | 0.07  | 0.12  | 0.18  | 0.24  | 0.29  | 0.32  | 0.35  |      |
|                                      | Cerebrovascular diseases                     | 0.00 | 0.00 | 0.00 | 0.00  | 0.00  | 0.00  | 0.00  | 0.01  | 0.01  | 0.03  | 0.05  | 0.08  | 0.12  | 0.16  | 0.20  | 0.23  |      |
|                                      | Congenital malformations                     | 0.07 | 0.00 | 0.00 | 0.00  | 0.00  | 0.00  | 0.00  | 0.00  | 0.00  | 0.00  | 0.00  | 0.00  | 0.00  | 0.00  | 0.00  | 0.00  |      |
|                                      | Diseases of the digestive system             | 0.00 | 0.00 | 0.00 | 0.00  | 0.00  | 0.00  | 0.00  | 0.00  | 0.01  | 0.01  | 0.01  | 0.01  | 0.01  | 0.01  | 0.01  | 0.01  |      |
|                                      | Diseases of the genitourinary system         | 0.00 | 0.00 | 0.00 | 0.00  | 0.00  | 0.00  | 0.00  | 0.00  | 0.00  | 0.00  | 0.00  | 0.00  | 0.01  | 0.01  | 0.01  | 0.01  |      |
|                                      | Diseases of the nervous system               | 0.00 | 0.00 | 0.00 | 0.00  | 0.00  | 0.00  | 0.00  | 0.00  | 0.00  | 0.00  | 0.00  | 0.00  | 0.00  | 0.00  | 0.00  | 0.00  |      |
|                                      | Diseases of the respiratory system           | 0.19 | 0.03 | 0.01 | 0.01  | 0.01  | 0.01  | 0.01  | 0.01  | 0.01  | 0.02  | 0.03  | 0.05  | 0.05  | 0.06  | 0.05  | 0.05  | 0.04 |
|                                      | Endocrine and metabolic diseases             | 0.00 | 0.00 | 0.00 | 0.00  | 0.00  | 0.00  | 0.00  | 0.00  | 0.00  | 0.00  | 0.00  | 0.00  | 0.00  | 0.00  | 0.00  | 0.00  |      |
|                                      | Infectious diseases                          | 0.01 | 0.00 | 0.00 | 0.00  | 0.01  | 0.01  | 0.01  | 0.01  | 0.01  | 0.02  | 0.02  | 0.02  | 0.02  | 0.02  | 0.01  | 0.01  | 0.00 |
|                                      | Injuries                                     | 0.02 | 0.03 | 0.03 | 0.04  | 0.05  | 0.05  | 0.04  | 0.05  | 0.07  | 0.08  | 0.09  | 0.09  | 0.08  | 0.08  | 0.06  | 0.04  | 0.02 |
|                                      | Nonavoidable deaths                          | 0.00 | 0.00 | 0.00 | 0.00  | 0.00  | 0.00  | 0.00  | 0.00  | 0.00  | 0.00  | 0.00  | 0.00  | 0.00  | 0.00  | 0.00  | 0.00  |      |
|                                      | Pregnancy, childbirth and perinatal period   | 0.14 | 0.00 | 0.00 | 0.00  | 0.00  | 0.00  | 0.00  | 0.00  | 0.00  | 0.00  | 0.00  | 0.00  | 0.00  | 0.00  | 0.00  | 0.00  |      |
|                                      | Adverse effects of medical and surgical care | 0.00 | 0.00 | 0.00 | 0.00  | 0.00  | 0.00  | 0.00  | 0.00  | 0.00  | 0.00  | 0.00  | 0.00  | 0.00  | 0.00  | 0.00  | 0.00  |      |
|                                      | Alcohol- related and drug related deaths     | 0.00 | 0.00 | 0.00 | 0.00  | 0.00  | -0.01 | 0.00  | 0.00  | 0.00  | 0.02  | 0.04  | 0.06  | 0.08  | 0.07  | 0.08  | 0.05  | 0.02 |
|                                      | Cancer                                       | 0.00 | 0.00 | 0.00 | 0.00  | 0.00  | 0.00  | 0.00  | 0.00  | 0.00  | 0.01  | 0.01  | 0.04  | 0.08  | 0.11  | 0.14  | 0.14  | 0.11 |
|                                      | Cardiovascular diseases                      | 0.00 | 0.00 | 0.00 | 0.00  | 0.00  | 0.00  | 0.00  | 0.00  | 0.01  | 0.02  | 0.04  | 0.08  | 0.14  | 0.21  | 0.28  | 0.32  | 0.35 |
|                                      | Cerebrovascular diseases                     | 0.00 | 0.00 | 0.00 | 0.00  | 0.00  | 0.00  | 0.00  | 0.00  | 0.00  | 0.01  | 0.02  | 0.04  | 0.05  | 0.08  | 0.11  | 0.11  |      |
|                                      | Congenital malformations                     | 0.03 | 0.00 | 0.00 | 0.00  | 0.00  | 0.00  | 0.00  | 0.00  | 0.00  | 0.00  | 0.00  | 0.00  | 0.00  | 0.00  | 0.00  | 0.00  |      |
| Diseases of the digestive system     | 0.00                                         | 0.00 | 0.00 | 0.00 | 0.00  | 0.00  | 0.00  | 0.00  | 0.00  | 0.01  | 0.01  | 0.01  | 0.01  | 0.01  | 0.02  | 0.01  | 0.01  |      |
| Diseases of the genitourinary system | 0.00                                         | 0.00 | 0.00 | 0.00 | 0.00  | 0.00  | 0.00  | 0.00  | 0.00  | 0.00  | 0.00  | 0.00  | 0.00  | 0.01  | 0.01  | 0.01  |       |      |
| Diseases of the nervous system       | 0.00                                         | 0.00 | 0.00 | 0.00 | 0.00  | 0.00  | 0.00  | 0.00  | 0.00  | 0.00  | 0.00  | 0.01  | 0.01  | 0.00  | 0.00  | 0.00  |       |      |

| Country                                    | Cause Group                                  | 0-1   | 1-4  | 5-9  | 10-14 | 15-19 | 20-24 | 25-29 | 30-34 | 35-39 | 40-44 | 45-49 | 50-54 | 55-59 | 60-64 | 65-69 | 70-74 |       |
|--------------------------------------------|----------------------------------------------|-------|------|------|-------|-------|-------|-------|-------|-------|-------|-------|-------|-------|-------|-------|-------|-------|
| Slovenia                                   | Diseases of the respiratory system           | 0.03  | 0.01 | 0.00 | 0.00  | 0.00  | 0.00  | 0.00  | 0.00  | 0.01  | 0.01  | 0.02  | 0.03  | 0.03  | 0.04  | 0.03  | 0.04  |       |
|                                            | Endocrine and metabolic diseases             | 0.00  | 0.00 | 0.00 | 0.00  | 0.00  | 0.00  | 0.00  | 0.00  | 0.00  | 0.00  | 0.00  | 0.00  | 0.00  | 0.01  | 0.01  | 0.01  |       |
|                                            | Infectious diseases                          | 0.01  | 0.00 | 0.00 | 0.00  | 0.00  | 0.00  | 0.00  | 0.00  | 0.00  | 0.00  | 0.00  | 0.00  | 0.00  | 0.00  | 0.00  | 0.00  | 0.00  |
|                                            | Injuries                                     | 0.01  | 0.01 | 0.01 | 0.01  | 0.03  | 0.05  | 0.03  | 0.04  | 0.06  | 0.07  | 0.09  | 0.10  | 0.08  | 0.06  | 0.04  | 0.03  |       |
|                                            | Nonavoidable deaths                          | 0.00  | 0.00 | 0.00 | 0.00  | 0.00  | 0.00  | 0.00  | 0.00  | 0.00  | 0.00  | 0.00  | 0.00  | 0.00  | 0.00  | 0.00  | 0.00  | 0.00  |
|                                            | Pregnancy, childbirth and perinatal period   | 0.04  | 0.00 | 0.00 | 0.00  | 0.00  | 0.00  | 0.00  | 0.00  | 0.00  | 0.00  | 0.00  | 0.00  | 0.00  | 0.00  | 0.00  | 0.00  | 0.00  |
|                                            | Adverse effects of medical and surgical care | 0.00  | 0.00 | 0.00 | 0.00  | 0.00  | 0.00  | 0.00  | 0.00  | 0.00  | 0.00  | 0.00  | 0.00  | 0.00  | 0.01  | 0.01  | 0.01  | 0.01  |
|                                            | Alcohol- related and drug related deaths     | 0.00  | 0.00 | 0.00 | 0.00  | 0.00  | 0.01  | 0.00  | 0.01  | 0.02  | 0.03  | 0.05  | 0.07  | 0.09  | 0.10  | 0.09  | 0.09  | 0.08  |
|                                            | Cancer                                       | 0.00  | 0.00 | 0.00 | 0.00  | 0.00  | 0.00  | 0.00  | 0.00  | 0.00  | 0.01  | 0.02  | 0.04  | 0.08  | 0.08  | 0.09  | 0.09  | 0.08  |
|                                            | Cardiovascular diseases                      | 0.00  | 0.00 | 0.00 | 0.00  | 0.00  | 0.00  | 0.00  | 0.00  | 0.00  | 0.00  | 0.01  | 0.02  | 0.02  | 0.04  | 0.03  | 0.04  |       |
|                                            | Cerebrovascular diseases                     | 0.00  | 0.00 | 0.00 | 0.00  | 0.00  | 0.00  | 0.00  | 0.00  | 0.00  | 0.00  | 0.00  | 0.01  | 0.01  | 0.03  | 0.04  | 0.06  |       |
|                                            | Congenital malformations                     | -0.01 | 0.00 | 0.00 | 0.00  | 0.00  | 0.00  | 0.00  | 0.00  | 0.00  | 0.00  | 0.00  | 0.00  | 0.00  | 0.00  | 0.00  | 0.00  | 0.00  |
|                                            | Diseases of the digestive system             | 0.00  | 0.00 | 0.00 | 0.00  | 0.00  | 0.00  | 0.00  | 0.00  | 0.00  | 0.00  | 0.00  | 0.00  | 0.00  | 0.00  | 0.00  | 0.00  | 0.00  |
|                                            | Diseases of the genitourinary system         | 0.00  | 0.00 | 0.00 | 0.00  | 0.00  | 0.00  | 0.00  | 0.00  | 0.00  | 0.00  | 0.00  | 0.00  | 0.00  | 0.00  | 0.00  | 0.00  | 0.00  |
|                                            | Diseases of the nervous system               | 0.00  | 0.00 | 0.00 | 0.00  | 0.00  | 0.00  | 0.00  | 0.00  | 0.00  | 0.00  | 0.00  | 0.00  | 0.00  | 0.00  | 0.00  | 0.00  | 0.00  |
|                                            | Diseases of the respiratory system           | 0.00  | 0.00 | 0.00 | 0.00  | 0.00  | 0.00  | 0.00  | 0.00  | 0.00  | 0.00  | 0.00  | 0.00  | -0.01 | -0.01 | -0.01 | -0.01 | -0.01 |
|                                            | Endocrine and metabolic diseases             | 0.00  | 0.00 | 0.00 | 0.00  | 0.00  | 0.00  | 0.00  | 0.00  | 0.00  | 0.00  | 0.00  | 0.00  | 0.00  | 0.00  | 0.00  | 0.00  | 0.00  |
|                                            | Infectious diseases                          | 0.00  | 0.00 | 0.00 | 0.00  | 0.00  | 0.00  | 0.00  | 0.00  | 0.00  | 0.00  | -0.01 | -0.01 | -0.01 | -0.01 | -0.01 | -0.01 | -0.01 |
|                                            | Injuries                                     | 0.00  | 0.00 | 0.00 | 0.00  | 0.03  | 0.05  | 0.04  | 0.03  | 0.03  | 0.05  | 0.05  | 0.06  | 0.05  | 0.05  | 0.04  | 0.04  |       |
|                                            | Nonavoidable deaths                          | 0.06  | 0.01 | 0.00 | 0.00  | 0.00  | 0.00  | 0.00  | 0.00  | 0.00  | 0.00  | 0.00  | 0.00  | 0.00  | 0.00  | 0.00  | 0.00  | 0.00  |
| Pregnancy, childbirth and perinatal period | -0.04                                        | 0.00  | 0.00 | 0.00 | 0.00  | 0.00  | 0.00  | 0.00  | 0.00  | 0.00  | 0.00  | 0.00  | 0.00  | 0.00  | 0.00  | 0.00  | 0.00  |       |
| New member states                          | Adverse effects of medical and surgical care | 0.00  | 0.00 | 0.00 | 0.00  | 0.00  | 0.00  | 0.00  | 0.00  | 0.00  | 0.00  | 0.00  | 0.00  | 0.00  | 0.00  | 0.00  | 0.00  |       |



| Country | Cause Group                                | 0-1  | 1-4  | 5-9  | 10-14 | 15-19 | 20-24 | 25-29 | 30-34 | 35-39 | 40-44 | 45-49 | 50-54 | 55-59 | 60-64 | 65-69 | 70-74 |
|---------|--------------------------------------------|------|------|------|-------|-------|-------|-------|-------|-------|-------|-------|-------|-------|-------|-------|-------|
|         | Alcohol- related and drug related deaths   | 0-00 | 0-00 | 0-00 | 0-00  | 0-00  | 0-01  | 0-02  | 0-03  | 0-03  | 0-05  | 0-06  | 0-07  | 0-06  | 0-06  | 0-04  | 0-02  |
|         | Cancer                                     | 0-00 | 0-00 | 0-00 | 0-00  | 0-00  | 0-00  | 0-00  | 0-00  | 0-01  | 0-01  | 0-03  | 0-06  | 0-09  | 0-11  | 0-10  | 0-07  |
|         | Cardiovascular diseases                    | 0-00 | 0-00 | 0-00 | 0-00  | 0-00  | 0-00  | 0-00  | 0-01  | 0-02  | 0-04  | 0-08  | 0-13  | 0-18  | 0-23  | 0-25  | 0-25  |
|         | Cerebrovascular diseases                   | 0-00 | 0-00 | 0-00 | 0-00  | 0-00  | 0-00  | 0-00  | 0-00  | 0-01  | 0-01  | 0-02  | 0-04  | 0-06  | 0-08  | 0-10  | 0-11  |
|         | Congenital malformations                   | 0-02 | 0-00 | 0-00 | 0-00  | 0-00  | 0-00  | 0-00  | 0-00  | 0-00  | 0-00  | 0-00  | 0-00  | 0-00  | 0-00  | 0-00  | 0-00  |
|         | Diseases of the digestive system           | 0-00 | 0-00 | 0-00 | 0-00  | 0-00  | 0-00  | 0-00  | 0-00  | 0-01  | 0-01  | 0-01  | 0-01  | 0-01  | 0-01  | 0-01  | 0-01  |
|         | Diseases of the genitourinary system       | 0-00 | 0-00 | 0-00 | 0-00  | 0-00  | 0-00  | 0-00  | 0-00  | 0-00  | 0-00  | 0-00  | 0-00  | 0-00  | 0-00  | 0-00  | 0-00  |
|         | Diseases of the nervous system             | 0-00 | 0-00 | 0-00 | 0-00  | 0-00  | 0-00  | 0-00  | 0-00  | 0-00  | 0-00  | 0-00  | 0-00  | 0-00  | 0-00  | 0-00  | 0-00  |
|         | Diseases of the respiratory system         | 0-03 | 0-00 | 0-00 | 0-00  | 0-00  | 0-00  | 0-00  | 0-01  | 0-01  | 0-01  | 0-02  | 0-02  | 0-02  | 0-02  | 0-02  | 0-01  |
|         | Endocrine and metabolic diseases           | 0-00 | 0-00 | 0-00 | 0-00  | 0-00  | 0-00  | 0-00  | 0-00  | 0-00  | 0-00  | 0-00  | 0-00  | 0-01  | 0-01  | 0-01  | 0-01  |
|         | Infectious diseases                        | 0-00 | 0-00 | 0-00 | 0-00  | 0-00  | 0-00  | 0-01  | 0-01  | 0-01  | 0-01  | 0-01  | 0-01  | 0-01  | 0-01  | 0-00  | 0-00  |
|         | Injuries                                   | 0-01 | 0-01 | 0-01 | 0-02  | 0-05  | 0-07  | 0-07  | 0-07  | 0-08  | 0-08  | 0-09  | 0-09  | 0-08  | 0-06  | 0-04  | 0-02  |
|         | Nonavoidable deaths                        | 0-01 | 0-00 | 0-00 | 0-00  | 0-00  | 0-00  | 0-00  | 0-00  | 0-00  | 0-00  | 0-01  | 0-01  | 0-01  | 0-01  | 0-01  | 0-00  |
|         | Pregnancy, childbirth and perinatal period | 0-04 | 0-00 | 0-00 | 0-00  | 0-00  | 0-00  | 0-00  | 0-00  | 0-00  | 0-00  | 0-00  | 0-00  | 0-00  | 0-00  | 0-00  | 0-00  |

**Supplementary Table 8: The average contribution of cause groups to the estimated gains in female life expectancy by new member state if they were assigned average avoidable mortality rates observed across the established member states, 2005-2019**

| Country                                    | Cause Group                                  | 0-1  | 1-4  | 5-9  | 10-14 | 15-19 | 20-24 | 25-29 | 30-34 | 35-39 | 40-44 | 45-49 | 50-54 | 55-59 | 60-64 | 65-69 | 70-74 |       |
|--------------------------------------------|----------------------------------------------|------|------|------|-------|-------|-------|-------|-------|-------|-------|-------|-------|-------|-------|-------|-------|-------|
| Bulgaria                                   | Adverse effects of medical and surgical care | 0.00 | 0.00 | 0.00 | 0.00  | 0.00  | 0.00  | 0.00  | 0.00  | 0.00  | 0.00  | 0.00  | 0.00  | 0.00  | 0.00  | 0.00  | 0.00  |       |
|                                            | Alcohol- related and drug related deaths     | 0.00 | 0.00 | 0.00 | 0.00  | 0.00  | 0.00  | 0.00  | 0.00  | 0.00  | 0.00  | 0.00  | -0.01 | 0.00  | 0.00  | 0.00  | 0.00  |       |
|                                            | Cancer                                       | 0.00 | 0.00 | 0.00 | 0.00  | 0.00  | 0.00  | 0.00  | 0.00  | 0.01  | 0.02  | 0.03  | 0.03  | 0.04  | 0.03  | 0.01  | 0.00  | -0.01 |
|                                            | Cardiovascular diseases                      | 0.00 | 0.00 | 0.00 | 0.00  | 0.00  | 0.00  | 0.00  | 0.00  | 0.01  | 0.02  | 0.04  | 0.06  | 0.08  | 0.12  | 0.16  | 0.21  |       |
|                                            | Cerebrovascular diseases                     | 0.01 | 0.00 | 0.00 | 0.00  | 0.00  | 0.00  | 0.00  | 0.00  | 0.01  | 0.01  | 0.03  | 0.04  | 0.07  | 0.10  | 0.16  | 0.23  |       |
|                                            | Congenital malformations                     | 0.03 | 0.00 | 0.00 | 0.00  | 0.00  | 0.00  | 0.00  | 0.00  | 0.00  | 0.00  | 0.00  | 0.00  | 0.00  | 0.00  | 0.00  | 0.00  | 0.00  |
|                                            | Diseases of the digestive system             | 0.00 | 0.00 | 0.00 | 0.00  | 0.00  | 0.00  | 0.00  | 0.00  | 0.00  | 0.00  | 0.00  | 0.00  | 0.00  | 0.00  | 0.00  | 0.00  | 0.00  |
|                                            | Diseases of the genitourinary system         | 0.00 | 0.00 | 0.00 | 0.00  | 0.00  | 0.00  | 0.00  | 0.00  | 0.00  | 0.00  | 0.00  | 0.01  | 0.01  | 0.01  | 0.01  | 0.01  | 0.01  |
|                                            | Diseases of the nervous system               | 0.00 | 0.00 | 0.00 | 0.00  | 0.00  | 0.00  | 0.00  | 0.00  | 0.00  | 0.00  | 0.00  | 0.00  | 0.00  | 0.00  | 0.00  | 0.00  | 0.00  |
|                                            | Diseases of the respiratory system           | 0.07 | 0.02 | 0.01 | 0.01  | 0.01  | 0.00  | 0.00  | 0.00  | 0.00  | 0.01  | 0.00  | 0.00  | 0.00  | 0.00  | -0.01 | -0.01 | -0.01 |
|                                            | Endocrine and metabolic diseases             | 0.00 | 0.00 | 0.00 | 0.00  | 0.00  | 0.00  | 0.00  | 0.00  | 0.00  | 0.00  | 0.00  | 0.01  | 0.01  | 0.01  | 0.02  | 0.02  |       |
|                                            | Infectious diseases                          | 0.01 | 0.00 | 0.00 | 0.00  | 0.00  | 0.00  | 0.00  | 0.00  | 0.00  | 0.00  | 0.00  | 0.00  | 0.00  | 0.00  | 0.00  | 0.00  | 0.00  |
|                                            | Injuries                                     | 0.01 | 0.01 | 0.01 | 0.01  | 0.02  | 0.01  | 0.00  | 0.01  | 0.01  | 0.01  | 0.01  | 0.01  | 0.01  | 0.00  | 0.00  | 0.00  | 0.00  |
|                                            | Nonavoidable deaths                          | 0.00 | 0.00 | 0.00 | 0.00  | 0.00  | 0.00  | 0.00  | 0.00  | 0.00  | 0.00  | 0.00  | 0.00  | 0.00  | 0.00  | 0.00  | 0.00  | 0.00  |
| Pregnancy, childbirth and perinatal period | 0.11                                         | 0.00 | 0.00 | 0.00 | 0.00  | 0.00  | 0.00  | 0.00  | 0.00  | 0.00  | 0.00  | 0.00  | 0.00  | 0.00  | 0.00  | 0.00  | 0.00  |       |
| Croatia                                    | Adverse effects of medical and surgical care | 0.00 | 0.00 | 0.00 | 0.00  | 0.00  | 0.00  | 0.00  | 0.00  | 0.00  | 0.00  | 0.00  | 0.00  | 0.00  | 0.00  | 0.00  | 0.00  |       |
|                                            | Alcohol- related and drug related deaths     | 0.00 | 0.00 | 0.00 | 0.00  | 0.00  | 0.00  | 0.00  | 0.00  | 0.00  | -0.01 | 0.00  | 0.00  | 0.00  | 0.01  | 0.01  | 0.01  |       |
|                                            | Cancer                                       | 0.00 | 0.00 | 0.00 | 0.00  | 0.00  | 0.00  | 0.00  | 0.00  | 0.01  | 0.01  | 0.02  | 0.03  | 0.04  | 0.04  | 0.04  | 0.04  |       |
|                                            | Cardiovascular diseases                      | 0.00 | 0.00 | 0.00 | 0.00  | 0.00  | 0.00  | 0.00  | 0.00  | 0.00  | 0.00  | 0.01  | 0.02  | 0.04  | 0.06  | 0.10  | 0.16  |       |
|                                            | Cerebrovascular diseases                     | 0.00 | 0.00 | 0.00 | 0.00  | 0.00  | 0.00  | 0.00  | 0.00  | 0.00  | 0.01  | 0.01  | 0.02  | 0.03  | 0.05  | 0.08  | 0.14  |       |
|                                            | Congenital malformations                     | 0.01 | 0.00 | 0.00 | 0.00  | 0.00  | 0.00  | 0.00  | 0.00  | 0.00  | 0.00  | 0.00  | 0.00  | 0.00  | 0.00  | 0.00  | 0.00  |       |

| Country             | Cause Group                                  | 0-1   | 1-4  | 5-9  | 10-14 | 15-19 | 20-24 | 25-29 | 30-34 | 35-39 | 40-44 | 45-49 | 50-54 | 55-59 | 60-64 | 65-69 | 70-74 |       |
|---------------------|----------------------------------------------|-------|------|------|-------|-------|-------|-------|-------|-------|-------|-------|-------|-------|-------|-------|-------|-------|
| Cyprus              | Diseases of the digestive system             | 0.00  | 0.00 | 0.00 | 0.00  | 0.00  | 0.00  | 0.00  | 0.00  | 0.00  | 0.00  | 0.00  | 0.00  | 0.00  | 0.00  | 0.00  | 0.00  |       |
|                     | Diseases of the genitourinary system         | 0.00  | 0.00 | 0.00 | 0.00  | 0.00  | 0.00  | 0.00  | 0.00  | 0.00  | 0.00  | 0.00  | 0.00  | 0.00  | 0.00  | 0.00  | 0.00  |       |
|                     | Diseases of the nervous system               | 0.00  | 0.00 | 0.00 | 0.00  | 0.00  | 0.00  | 0.00  | 0.00  | 0.00  | 0.00  | 0.00  | 0.00  | 0.00  | 0.00  | 0.00  | 0.00  |       |
|                     | Diseases of the respiratory system           | 0.00  | 0.00 | 0.00 | 0.00  | 0.00  | 0.00  | 0.00  | 0.00  | 0.00  | 0.00  | 0.00  | 0.00  | 0.00  | 0.00  | -0.01 | -0.01 | -0.01 |
|                     | Endocrine and metabolic diseases             | 0.00  | 0.00 | 0.00 | 0.00  | 0.00  | 0.00  | 0.00  | 0.00  | 0.00  | 0.00  | 0.00  | 0.00  | 0.00  | 0.00  | 0.01  | 0.02  | 0.03  |
|                     | Infectious diseases                          | 0.00  | 0.00 | 0.00 | 0.00  | 0.00  | 0.00  | 0.00  | 0.00  | 0.00  | 0.00  | 0.00  | 0.00  | 0.00  | 0.00  | 0.00  | 0.00  | 0.00  |
|                     | Injuries                                     | 0.00  | 0.00 | 0.01 | 0.00  | 0.01  | 0.01  | 0.00  | 0.00  | 0.00  | 0.01  | 0.00  | 0.01  | 0.01  | 0.01  | 0.01  | 0.01  | 0.02  |
|                     | Nonavoidable deaths                          | 0.00  | 0.00 | 0.00 | 0.00  | 0.00  | 0.00  | 0.00  | 0.00  | 0.00  | 0.00  | 0.00  | 0.00  | 0.00  | 0.00  | 0.00  | 0.00  | 0.00  |
|                     | Pregnancy, childbirth and perinatal period   | 0.05  | 0.00 | 0.00 | 0.00  | 0.00  | 0.00  | 0.00  | 0.00  | 0.00  | 0.00  | 0.00  | 0.00  | 0.00  | 0.00  | 0.00  | 0.00  | 0.00  |
|                     | Adverse effects of medical and surgical care | 0.00  | 0.00 | 0.00 | 0.00  | 0.00  | 0.00  | 0.00  | 0.00  | 0.00  | 0.00  | 0.00  | 0.00  | 0.00  | 0.00  | 0.00  | 0.00  | 0.00  |
|                     | Alcohol- related and drug related deaths     | 0.00  | 0.00 | 0.00 | 0.00  | 0.00  | 0.00  | 0.00  | 0.00  | -0.01 | -0.01 | -0.01 | -0.02 | -0.02 | -0.02 | -0.02 | -0.01 | -0.01 |
|                     | Cancer                                       | 0.00  | 0.00 | 0.00 | 0.00  | 0.00  | 0.00  | 0.00  | 0.00  | 0.00  | -0.01 | -0.01 | -0.03 | -0.04 | -0.04 | -0.06 | -0.07 | -0.07 |
|                     | Cardiovascular diseases                      | 0.00  | 0.00 | 0.00 | 0.00  | 0.00  | 0.00  | 0.00  | 0.00  | 0.00  | 0.00  | 0.01  | 0.00  | 0.01  | 0.00  | 0.00  | 0.01  | -0.01 |
|                     | Cerebrovascular diseases                     | 0.00  | 0.00 | 0.00 | 0.00  | 0.00  | 0.00  | 0.00  | 0.00  | 0.00  | 0.00  | 0.00  | 0.00  | 0.00  | 0.00  | 0.00  | -0.01 | 0.00  |
|                     | Congenital malformations                     | -0.01 | 0.00 | 0.00 | 0.00  | 0.00  | 0.00  | 0.00  | 0.00  | 0.00  | 0.00  | 0.00  | 0.00  | 0.00  | 0.00  | 0.00  | 0.00  | 0.00  |
|                     | Diseases of the digestive system             | 0.00  | 0.00 | 0.00 | 0.00  | 0.00  | 0.00  | 0.00  | 0.00  | 0.00  | 0.00  | 0.00  | 0.00  | 0.00  | 0.00  | 0.00  | 0.00  | 0.00  |
|                     | Diseases of the genitourinary system         | 0.00  | 0.00 | 0.00 | 0.00  | 0.00  | 0.00  | 0.00  | 0.00  | 0.00  | 0.00  | 0.00  | 0.00  | 0.00  | 0.00  | 0.00  | 0.00  | 0.00  |
|                     | Diseases of the nervous system               | 0.00  | 0.00 | 0.00 | 0.00  | 0.00  | 0.00  | 0.00  | 0.00  | 0.00  | 0.00  | 0.00  | 0.00  | 0.00  | 0.00  | 0.00  | 0.00  | 0.00  |
|                     | Diseases of the respiratory system           | 0.00  | 0.00 | 0.00 | 0.00  | 0.00  | 0.00  | 0.00  | 0.00  | 0.00  | 0.00  | 0.00  | 0.00  | 0.00  | 0.00  | -0.01 | -0.02 | -0.03 |
|                     | Endocrine and metabolic diseases             | 0.00  | 0.00 | 0.00 | 0.00  | 0.00  | 0.00  | 0.00  | 0.00  | 0.00  | 0.00  | 0.00  | 0.00  | 0.00  | 0.00  | 0.01  | 0.02  | 0.06  |
| Infectious diseases | 0.00                                         | 0.00  | 0.00 | 0.00 | 0.00  | 0.00  | 0.00  | 0.00  | 0.00  | 0.00  | 0.00  | 0.00  | 0.00  | 0.00  | 0.00  | 0.00  | 0.00  |       |
| Injuries            | 0.00                                         | 0.01  | 0.01 | 0.01 | 0.00  | 0.00  | 0.00  | 0.01  | 0.01  | 0.01  | 0.00  | 0.00  | -0.01 | 0.00  | 0.00  | 0.00  | 0.00  |       |

| Country        | Cause Group                                  | 0-1   | 1-4  | 5-9  | 10-14 | 15-19 | 20-24 | 25-29 | 30-34 | 35-39 | 40-44 | 45-49 | 50-54 | 55-59 | 60-64 | 65-69 | 70-74 |      |
|----------------|----------------------------------------------|-------|------|------|-------|-------|-------|-------|-------|-------|-------|-------|-------|-------|-------|-------|-------|------|
| Czech Republic | Nonavoidable deaths                          | 0.05  | 0.01 | 0.00 | 0.01  | 0.01  | 0.02  | 0.01  | 0.01  | 0.02  | 0.02  | 0.07  | 0.07  | 0.08  | 0.10  | 0.10  | 0.07  |      |
|                | Pregnancy, childbirth and perinatal period   | -0.03 | 0.00 | 0.00 | 0.00  | 0.00  | 0.00  | 0.00  | 0.00  | 0.00  | 0.00  | 0.00  | 0.00  | 0.00  | 0.00  | 0.00  | 0.00  |      |
|                | Adverse effects of medical and surgical care | 0.00  | 0.00 | 0.00 | 0.00  | 0.00  | 0.00  | 0.00  | 0.00  | 0.00  | 0.00  | 0.00  | 0.00  | 0.00  | 0.00  | 0.00  | 0.00  | 0.00 |
|                | Alcohol- related and drug related deaths     | 0.00  | 0.00 | 0.00 | 0.00  | 0.00  | 0.00  | 0.00  | 0.00  | 0.00  | 0.00  | 0.01  | 0.01  | 0.02  | 0.02  | 0.01  | 0.00  | 0.00 |
|                | Cancer                                       | 0.00  | 0.00 | 0.00 | 0.00  | 0.00  | 0.00  | 0.00  | 0.00  | 0.00  | 0.00  | 0.00  | -0.01 | -0.01 | 0.00  | 0.03  | 0.04  | 0.03 |
|                | Cardiovascular diseases                      | 0.00  | 0.00 | 0.00 | 0.00  | 0.00  | 0.00  | 0.00  | 0.00  | 0.00  | 0.00  | 0.01  | 0.01  | 0.02  | 0.04  | 0.08  | 0.12  | 0.19 |
|                | Cerebrovascular diseases                     | 0.00  | 0.00 | 0.00 | 0.00  | 0.00  | 0.00  | 0.00  | 0.00  | 0.00  | 0.00  | 0.00  | 0.00  | 0.00  | 0.01  | 0.02  | 0.03  | 0.05 |
|                | Congenital malformations                     | -0.01 | 0.00 | 0.00 | 0.00  | 0.00  | 0.00  | 0.00  | 0.00  | 0.00  | 0.00  | 0.00  | 0.00  | 0.00  | 0.00  | 0.00  | 0.00  | 0.00 |
|                | Diseases of the digestive system             | 0.00  | 0.00 | 0.00 | 0.00  | 0.00  | 0.00  | 0.00  | 0.00  | 0.00  | 0.00  | 0.00  | 0.00  | 0.00  | 0.00  | 0.00  | 0.01  | 0.01 |
|                | Diseases of the genitourinary system         | 0.00  | 0.00 | 0.00 | 0.00  | 0.00  | 0.00  | 0.00  | 0.00  | 0.00  | 0.00  | 0.00  | 0.00  | 0.00  | 0.00  | 0.00  | 0.00  | 0.00 |
|                | Diseases of the nervous system               | 0.00  | 0.00 | 0.00 | 0.00  | 0.00  | 0.00  | 0.00  | 0.00  | 0.00  | 0.00  | 0.00  | 0.00  | 0.00  | 0.00  | 0.00  | 0.00  | 0.00 |
|                | Diseases of the respiratory system           | 0.00  | 0.00 | 0.00 | 0.00  | 0.00  | 0.00  | 0.00  | 0.00  | 0.00  | 0.00  | 0.00  | 0.00  | 0.00  | 0.00  | 0.01  | 0.01  | 0.01 |
|                | Endocrine and metabolic diseases             | 0.00  | 0.00 | 0.00 | 0.00  | 0.00  | 0.00  | 0.00  | 0.00  | 0.00  | 0.00  | 0.00  | 0.00  | 0.00  | 0.00  | 0.01  | 0.01  | 0.02 |
|                | Infectious diseases                          | 0.00  | 0.00 | 0.00 | 0.00  | 0.00  | 0.00  | 0.00  | 0.00  | 0.00  | 0.00  | 0.00  | 0.00  | 0.00  | 0.00  | 0.00  | 0.00  | 0.00 |
|                | Injuries                                     | 0.01  | 0.00 | 0.00 | 0.00  | 0.01  | 0.01  | 0.01  | 0.01  | 0.01  | 0.01  | 0.01  | 0.01  | 0.01  | 0.01  | 0.01  | 0.01  | 0.01 |
| Estonia        | Nonavoidable deaths                          | 0.04  | 0.00 | 0.00 | 0.00  | 0.00  | 0.00  | 0.00  | 0.00  | 0.00  | 0.00  | 0.00  | 0.00  | 0.00  | 0.00  | 0.00  | 0.00  |      |
|                | Pregnancy, childbirth and perinatal period   | -0.03 | 0.00 | 0.00 | 0.00  | 0.00  | 0.00  | 0.00  | 0.00  | 0.00  | 0.00  | 0.00  | 0.00  | 0.00  | 0.00  | 0.00  | 0.00  |      |
|                | Adverse effects of medical and surgical care | 0.00  | 0.00 | 0.00 | 0.00  | 0.00  | 0.00  | 0.00  | 0.00  | 0.00  | 0.00  | 0.00  | 0.00  | 0.00  | 0.00  | 0.00  | 0.00  |      |
|                | Alcohol- related and drug related deaths     | 0.00  | 0.00 | 0.00 | 0.00  | 0.01  | 0.02  | 0.03  | 0.04  | 0.03  | 0.04  | 0.06  | 0.07  | 0.07  | 0.05  | 0.03  | 0.01  |      |
|                | Cancer                                       | 0.00  | 0.00 | 0.00 | 0.00  | 0.00  | 0.00  | 0.00  | 0.00  | 0.01  | 0.01  | 0.01  | 0.01  | 0.01  | 0.03  | 0.01  | 0.02  |      |
|                | Cerebrovascular diseases                     | 0.00  | 0.00 | 0.00 | 0.00  | 0.00  | 0.00  | 0.00  | 0.00  | 0.00  | 0.01  | 0.02  | 0.04  | 0.08  | 0.13  | 0.20  | 0.31  |      |

| Country                          | Cause Group                                  | 0-1   | 1-4  | 5-9  | 10-14 | 15-19 | 20-24 | 25-29 | 30-34 | 35-39 | 40-44 | 45-49 | 50-54 | 55-59 | 60-64 | 65-69 | 70-74 |       |
|----------------------------------|----------------------------------------------|-------|------|------|-------|-------|-------|-------|-------|-------|-------|-------|-------|-------|-------|-------|-------|-------|
| Hungary                          | Congenital malformations                     | 0.00  | 0.00 | 0.00 | 0.00  | 0.00  | 0.00  | 0.00  | 0.00  | 0.00  | 0.00  | 0.00  | 0.00  | 0.00  | 0.00  | 0.00  | 0.00  |       |
|                                  | Diseases of the digestive system             | 0.00  | 0.00 | 0.00 | 0.00  | 0.00  | 0.00  | 0.00  | 0.00  | 0.00  | 0.00  | 0.00  | 0.00  | 0.00  | 0.00  | 0.01  | 0.00  | 0.00  |
|                                  | Diseases of the genitourinary system         | 0.00  | 0.00 | 0.00 | 0.00  | 0.00  | 0.00  | 0.00  | 0.00  | 0.00  | 0.00  | 0.00  | 0.00  | 0.00  | 0.00  | 0.00  | 0.00  | -0.01 |
|                                  | Diseases of the nervous system               | 0.00  | 0.00 | 0.00 | 0.00  | 0.00  | 0.00  | 0.00  | 0.00  | 0.00  | 0.00  | 0.00  | 0.00  | 0.00  | 0.00  | 0.00  | 0.00  | 0.00  |
|                                  | Diseases of the respiratory system           | 0.00  | 0.00 | 0.00 | 0.00  | 0.00  | 0.00  | 0.00  | 0.00  | 0.00  | 0.01  | 0.00  | 0.00  | 0.00  | 0.00  | -0.01 | -0.02 | -0.03 |
|                                  | Endocrine and metabolic diseases             | 0.00  | 0.00 | 0.00 | 0.00  | 0.00  | 0.00  | 0.00  | 0.00  | 0.00  | 0.00  | 0.00  | 0.00  | 0.00  | 0.00  | 0.00  | 0.01  | 0.00  |
|                                  | Infectious diseases                          | 0.00  | 0.00 | 0.00 | 0.00  | 0.00  | 0.01  | 0.02  | 0.01  | 0.01  | 0.01  | 0.01  | 0.00  | 0.00  | 0.00  | 0.00  | -0.01 | -0.01 |
|                                  | Injuries                                     | 0.02  | 0.02 | 0.01 | 0.02  | 0.03  | 0.02  | 0.01  | 0.02  | 0.02  | 0.02  | 0.02  | 0.02  | 0.03  | 0.03  | 0.02  | 0.01  | 0.01  |
|                                  | Nonavoidable deaths                          | 0.02  | 0.00 | 0.00 | 0.00  | 0.00  | 0.00  | 0.00  | 0.00  | 0.00  | 0.00  | 0.00  | 0.00  | 0.00  | 0.00  | 0.00  | 0.00  | 0.00  |
|                                  | Pregnancy, childbirth and perinatal period   | -0.03 | 0.00 | 0.00 | 0.00  | 0.00  | 0.00  | 0.00  | 0.00  | 0.00  | 0.00  | 0.00  | 0.00  | 0.00  | 0.00  | 0.00  | 0.00  | 0.00  |
|                                  | Adverse effects of medical and surgical care | 0.00  | 0.00 | 0.00 | 0.00  | 0.00  | 0.00  | 0.00  | 0.00  | 0.00  | 0.00  | 0.00  | 0.00  | 0.00  | 0.00  | 0.00  | 0.00  | 0.00  |
|                                  | Alcohol- related and drug related deaths     | 0.00  | 0.00 | 0.00 | 0.00  | 0.00  | 0.00  | 0.00  | 0.00  | 0.00  | 0.01  | 0.03  | 0.05  | 0.05  | 0.04  | 0.03  | 0.03  | 0.01  |
|                                  | Cancer                                       | 0.00  | 0.00 | 0.00 | 0.00  | 0.00  | 0.00  | 0.00  | 0.00  | 0.01  | 0.02  | 0.03  | 0.07  | 0.12  | 0.15  | 0.15  | 0.12  | 0.09  |
|                                  | Cardiovascular diseases                      | 0.00  | 0.00 | 0.00 | 0.00  | 0.00  | 0.00  | 0.00  | 0.00  | 0.01  | 0.02  | 0.04  | 0.07  | 0.11  | 0.16  | 0.22  | 0.30  | 0.30  |
|                                  | Cerebrovascular diseases                     | 0.00  | 0.00 | 0.00 | 0.00  | 0.00  | 0.00  | 0.00  | 0.00  | 0.00  | 0.01  | 0.02  | 0.02  | 0.03  | 0.05  | 0.06  | 0.06  | 0.08  |
|                                  | Congenital malformations                     | 0.02  | 0.00 | 0.00 | 0.00  | 0.00  | 0.00  | 0.00  | 0.00  | 0.00  | 0.00  | 0.00  | 0.00  | 0.00  | 0.00  | 0.00  | 0.00  | 0.00  |
|                                  | Diseases of the digestive system             | 0.00  | 0.00 | 0.00 | 0.00  | 0.00  | 0.00  | 0.00  | 0.00  | 0.00  | 0.00  | 0.00  | 0.00  | 0.01  | 0.01  | 0.01  | 0.01  | 0.01  |
|                                  | Diseases of the genitourinary system         | 0.00  | 0.00 | 0.00 | 0.00  | 0.00  | 0.00  | 0.00  | 0.00  | 0.00  | 0.00  | 0.00  | 0.00  | 0.00  | 0.00  | 0.00  | 0.00  | 0.00  |
|                                  | Diseases of the nervous system               | 0.00  | 0.00 | 0.00 | 0.00  | 0.00  | 0.00  | 0.00  | 0.00  | 0.00  | 0.00  | 0.00  | 0.00  | 0.00  | 0.00  | 0.00  | 0.00  | 0.00  |
|                                  | Diseases of the respiratory system           | 0.00  | 0.00 | 0.00 | 0.00  | 0.00  | 0.00  | 0.00  | 0.00  | 0.00  | 0.00  | 0.01  | 0.01  | 0.03  | 0.03  | 0.03  | 0.03  | 0.02  |
| Endocrine and metabolic diseases | 0.00                                         | 0.00  | 0.00 | 0.00 | 0.00  | 0.00  | 0.00  | 0.00  | 0.00  | 0.00  | 0.00  | 0.00  | 0.01  | 0.01  | 0.02  | 0.02  | 0.03  |       |
| Infectious diseases              | 0.00                                         | 0.00  | 0.00 | 0.00 | 0.00  | 0.00  | 0.00  | 0.00  | 0.00  | 0.00  | 0.00  | 0.00  | 0.00  | 0.00  | 0.00  | 0.00  | -0.01 |       |

| Country             | Cause Group                                  | 0-1  | 1-4  | 5-9  | 10-14 | 15-19 | 20-24 | 25-29 | 30-34 | 35-39 | 40-44 | 45-49 | 50-54 | 55-59 | 60-64 | 65-69 | 70-74 |       |
|---------------------|----------------------------------------------|------|------|------|-------|-------|-------|-------|-------|-------|-------|-------|-------|-------|-------|-------|-------|-------|
| Latvia              | Injuries                                     | 0.01 | 0.00 | 0.00 | 0.00  | 0.01  | 0.00  | 0.00  | 0.01  | 0.01  | 0.01  | 0.02  | 0.02  | 0.02  | 0.01  | 0.01  | 0.01  |       |
|                     | Nonavoidable deaths                          | 0.00 | 0.00 | 0.00 | 0.00  | 0.00  | 0.00  | 0.00  | 0.00  | 0.00  | 0.00  | 0.00  | 0.00  | 0.00  | 0.00  | 0.00  | 0.00  | 0.00  |
|                     | Pregnancy, childbirth and perinatal period   | 0.07 | 0.00 | 0.00 | 0.00  | 0.00  | 0.00  | 0.00  | 0.00  | 0.00  | 0.00  | 0.00  | 0.00  | 0.00  | 0.00  | 0.00  | 0.00  | 0.00  |
|                     | Adverse effects of medical and surgical care | 0.00 | 0.00 | 0.00 | 0.00  | 0.00  | 0.00  | 0.00  | 0.00  | 0.00  | 0.00  | 0.00  | 0.00  | 0.00  | 0.00  | 0.00  | 0.00  | 0.00  |
|                     | Alcohol- related and drug related deaths     | 0.00 | 0.00 | 0.00 | 0.00  | 0.00  | 0.00  | 0.00  | 0.01  | 0.02  | 0.04  | 0.05  | 0.06  | 0.06  | 0.05  | 0.04  | 0.02  | 0.01  |
|                     | Cancer                                       | 0.00 | 0.00 | 0.00 | 0.00  | 0.00  | 0.00  | 0.00  | 0.01  | 0.01  | 0.02  | 0.03  | 0.03  | 0.03  | 0.04  | 0.03  | 0.02  | 0.02  |
|                     | Cardiovascular diseases                      | 0.00 | 0.00 | 0.00 | 0.00  | 0.00  | 0.00  | 0.00  | 0.00  | 0.01  | 0.02  | 0.03  | 0.07  | 0.12  | 0.18  | 0.25  | 0.31  |       |
|                     | Cerebrovascular diseases                     | 0.00 | 0.00 | 0.00 | 0.00  | 0.00  | 0.00  | 0.00  | 0.00  | 0.01  | 0.01  | 0.02  | 0.04  | 0.06  | 0.10  | 0.14  | 0.20  |       |
|                     | Congenital malformations                     | 0.01 | 0.00 | 0.00 | 0.00  | 0.00  | 0.00  | 0.00  | 0.00  | 0.00  | 0.00  | 0.00  | 0.00  | 0.00  | 0.00  | 0.00  | 0.00  | 0.00  |
|                     | Diseases of the digestive system             | 0.00 | 0.00 | 0.00 | 0.00  | 0.00  | 0.00  | 0.00  | 0.00  | 0.00  | 0.00  | 0.01  | 0.00  | 0.01  | 0.01  | 0.01  | 0.01  | 0.01  |
|                     | Diseases of the genitourinary system         | 0.00 | 0.00 | 0.00 | 0.00  | 0.00  | 0.00  | 0.00  | 0.00  | 0.00  | 0.00  | 0.00  | 0.00  | 0.00  | 0.00  | 0.00  | 0.00  | 0.00  |
|                     | Diseases of the nervous system               | 0.00 | 0.00 | 0.00 | 0.00  | 0.00  | 0.00  | 0.00  | 0.00  | 0.00  | 0.00  | 0.00  | 0.00  | 0.00  | 0.00  | 0.00  | 0.00  | 0.00  |
|                     | Diseases of the respiratory system           | 0.00 | 0.00 | 0.00 | 0.00  | 0.00  | 0.00  | 0.00  | 0.01  | 0.00  | 0.01  | 0.01  | 0.01  | 0.01  | 0.00  | 0.00  | -0.02 | -0.03 |
|                     | Endocrine and metabolic diseases             | 0.00 | 0.00 | 0.00 | 0.00  | 0.00  | 0.00  | 0.00  | 0.00  | 0.00  | 0.00  | 0.00  | 0.01  | 0.01  | 0.01  | 0.02  | 0.02  |       |
| Infectious diseases | 0.00                                         | 0.00 | 0.00 | 0.00 | 0.00  | 0.00  | 0.00  | 0.01  | 0.02  | 0.02  | 0.01  | 0.01  | 0.01  | 0.01  | 0.00  | 0.00  | 0.00  |       |
| Lithuania           | Injuries                                     | 0.01 | 0.02 | 0.02 | 0.02  | 0.03  | 0.02  | 0.02  | 0.03  | 0.04  | 0.04  | 0.04  | 0.04  | 0.04  | 0.03  | 0.02  | 0.01  |       |
|                     | Nonavoidable deaths                          | 0.00 | 0.00 | 0.00 | 0.00  | 0.00  | 0.00  | 0.00  | 0.00  | 0.00  | 0.00  | 0.00  | 0.00  | 0.00  | 0.00  | 0.00  | 0.00  |       |
|                     | Pregnancy, childbirth and perinatal period   | 0.08 | 0.00 | 0.00 | 0.00  | 0.00  | 0.00  | 0.00  | 0.00  | 0.00  | 0.00  | 0.00  | 0.00  | 0.00  | 0.00  | 0.00  | 0.00  |       |
|                     | Adverse effects of medical and surgical care | 0.00 | 0.00 | 0.00 | 0.00  | 0.00  | 0.00  | 0.00  | 0.00  | 0.00  | 0.00  | 0.00  | 0.00  | 0.00  | 0.00  | 0.00  | 0.00  |       |
|                     | Alcohol- related and drug related deaths     | 0.00 | 0.00 | 0.00 | 0.00  | 0.00  | 0.00  | 0.01  | 0.03  | 0.04  | 0.04  | 0.05  | 0.06  | 0.06  | 0.05  | 0.02  | 0.00  |       |
|                     | Cancer                                       | 0.00 | 0.00 | 0.00 | 0.00  | 0.00  | 0.00  | 0.01  | 0.01  | 0.03  | 0.03  | 0.03  | 0.03  | 0.03  | 0.03  | 0.01  | 0.00  | -0.01 |
|                     | Cardiovascular diseases                      | 0.00 | 0.00 | 0.00 | 0.00  | 0.00  | 0.00  | 0.00  | 0.00  | 0.01  | 0.02  | 0.03  | 0.06  | 0.11  | 0.17  | 0.24  | 0.32  |       |

| Country                            | Cause Group                                  | 0-1  | 1-4  | 5-9  | 10-14 | 15-19 | 20-24 | 25-29 | 30-34 | 35-39 | 40-44 | 45-49 | 50-54 | 55-59 | 60-64 | 65-69 | 70-74 |       |
|------------------------------------|----------------------------------------------|------|------|------|-------|-------|-------|-------|-------|-------|-------|-------|-------|-------|-------|-------|-------|-------|
| Malta                              | Cerebrovascular diseases                     | 0.00 | 0.00 | 0.00 | 0.00  | 0.00  | 0.00  | 0.00  | 0.00  | 0.01  | 0.01  | 0.02  | 0.03  | 0.04  | 0.07  | 0.10  | 0.15  |       |
|                                    | Congenital malformations                     | 0.02 | 0.00 | 0.00 | 0.00  | 0.00  | 0.00  | 0.00  | 0.00  | 0.00  | 0.00  | 0.00  | 0.00  | 0.00  | 0.00  | 0.00  | 0.00  | 0.00  |
|                                    | Diseases of the digestive system             | 0.00 | 0.00 | 0.00 | 0.00  | 0.00  | 0.00  | 0.00  | 0.00  | 0.00  | 0.00  | 0.01  | 0.01  | 0.01  | 0.01  | 0.01  | 0.01  | 0.01  |
|                                    | Diseases of the genitourinary system         | 0.00 | 0.00 | 0.00 | 0.00  | 0.00  | 0.00  | 0.00  | 0.00  | 0.00  | 0.00  | 0.00  | 0.00  | 0.00  | 0.00  | 0.00  | 0.00  | 0.00  |
|                                    | Diseases of the nervous system               | 0.00 | 0.00 | 0.00 | 0.00  | 0.00  | 0.00  | 0.00  | 0.00  | 0.00  | 0.00  | 0.00  | 0.00  | 0.00  | 0.00  | 0.00  | 0.00  | 0.00  |
|                                    | Diseases of the respiratory system           | 0.01 | 0.00 | 0.00 | 0.00  | 0.00  | 0.00  | 0.00  | 0.00  | 0.01  | 0.01  | 0.01  | 0.01  | 0.00  | 0.00  | -0.01 | -0.02 | -0.03 |
|                                    | Endocrine and metabolic diseases             | 0.00 | 0.00 | 0.00 | 0.00  | 0.00  | 0.00  | 0.00  | 0.00  | 0.00  | 0.00  | 0.00  | 0.00  | 0.00  | 0.00  | 0.00  | 0.01  | 0.00  |
|                                    | Infectious diseases                          | 0.01 | 0.00 | 0.00 | 0.00  | 0.00  | 0.00  | 0.01  | 0.01  | 0.01  | 0.01  | 0.01  | 0.01  | 0.01  | 0.01  | 0.01  | 0.01  | 0.00  |
|                                    | Injuries                                     | 0.02 | 0.01 | 0.02 | 0.02  | 0.03  | 0.03  | 0.03  | 0.04  | 0.05  | 0.06  | 0.06  | 0.07  | 0.06  | 0.06  | 0.05  | 0.03  | 0.02  |
|                                    | Nonavoidable deaths                          | 0.01 | 0.00 | 0.00 | 0.00  | 0.00  | 0.00  | 0.00  | 0.00  | 0.00  | 0.00  | 0.00  | 0.00  | 0.00  | 0.00  | 0.00  | 0.00  | 0.00  |
|                                    | Pregnancy, childbirth and perinatal period   | 0.00 | 0.00 | 0.00 | 0.00  | 0.00  | 0.00  | 0.00  | 0.00  | 0.00  | 0.00  | 0.00  | 0.00  | 0.00  | 0.00  | 0.00  | 0.00  | 0.00  |
|                                    | Adverse effects of medical and surgical care | 0.00 | 0.00 | 0.00 | 0.00  | 0.00  | 0.00  | 0.00  | 0.00  | 0.00  | 0.00  | 0.00  | 0.00  | 0.00  | 0.00  | 0.00  | 0.00  | 0.00  |
|                                    | Alcohol- related and drug related deaths     | 0.00 | 0.00 | 0.00 | 0.00  | 0.00  | 0.00  | 0.00  | 0.00  | 0.00  | -0.01 | -0.02 | -0.02 | -0.02 | -0.02 | -0.01 | -0.02 | -0.01 |
|                                    | Cancer                                       | 0.00 | 0.00 | 0.00 | 0.00  | 0.00  | 0.00  | 0.00  | 0.00  | 0.00  | 0.00  | -0.01 | -0.01 | -0.02 | -0.01 | -0.01 | -0.02 | -0.02 |
|                                    | Cardiovascular diseases                      | 0.00 | 0.00 | 0.00 | 0.00  | 0.00  | 0.00  | 0.00  | 0.00  | 0.00  | 0.00  | 0.00  | 0.01  | 0.01  | 0.02  | 0.04  | 0.05  | 0.09  |
|                                    | Cerebrovascular diseases                     | 0.00 | 0.00 | 0.00 | 0.01  | 0.00  | 0.00  | 0.00  | 0.00  | 0.00  | 0.00  | 0.00  | 0.00  | 0.00  | 0.00  | 0.01  | 0.01  | 0.03  |
|                                    | Congenital malformations                     | 0.05 | 0.00 | 0.00 | 0.00  | 0.00  | 0.00  | 0.00  | 0.00  | 0.00  | 0.00  | 0.00  | 0.00  | 0.00  | 0.00  | 0.00  | 0.00  | 0.00  |
|                                    | Diseases of the digestive system             | 0.00 | 0.00 | 0.00 | 0.00  | 0.00  | 0.00  | 0.00  | 0.00  | 0.00  | 0.00  | 0.00  | 0.00  | 0.00  | 0.00  | 0.00  | 0.00  | 0.00  |
|                                    | Diseases of the genitourinary system         | 0.00 | 0.00 | 0.00 | 0.00  | 0.00  | 0.00  | 0.00  | 0.00  | 0.00  | 0.00  | 0.00  | 0.00  | 0.00  | 0.00  | 0.00  | 0.01  | 0.00  |
|                                    | Diseases of the nervous system               | 0.00 | 0.00 | 0.00 | 0.00  | 0.00  | 0.00  | 0.00  | 0.00  | 0.00  | 0.00  | 0.00  | 0.00  | 0.00  | 0.00  | 0.00  | 0.00  | 0.00  |
| Diseases of the respiratory system | 0.01                                         | 0.00 | 0.00 | 0.00 | 0.00  | 0.00  | 0.00  | 0.00  | 0.00  | 0.00  | 0.00  | 0.00  | 0.00  | -0.01 | -0.01 | -0.02 | -0.02 |       |
| Endocrine and metabolic diseases   | 0.00                                         | 0.00 | 0.00 | 0.00 | 0.00  | 0.00  | 0.00  | 0.00  | 0.00  | 0.00  | 0.00  | 0.01  | 0.00  | 0.01  | 0.01  | 0.02  | 0.02  |       |

| Country                                      | Cause Group                                  | 0-1                 | 1-4  | 5-9  | 10-14 | 15-19 | 20-24 | 25-29 | 30-34 | 35-39 | 40-44 | 45-49 | 50-54 | 55-59 | 60-64 | 65-69 | 70-74 |
|----------------------------------------------|----------------------------------------------|---------------------|------|------|-------|-------|-------|-------|-------|-------|-------|-------|-------|-------|-------|-------|-------|
| Poland                                       | Infectious diseases                          | 0.01                | 0.01 | 0.00 | 0.00  | 0.00  | 0.00  | 0.00  | 0.00  | 0.00  | 0.00  | 0.00  | 0.00  | -0.01 | -0.01 | 0.00  | -0.01 |
|                                              | Injuries                                     | 0.00                | 0.00 | 0.00 | 0.01  | 0.00  | -0.01 | -0.01 | -0.01 | 0.00  | -0.01 | -0.01 | -0.01 | -0.01 | -0.01 | 0.00  | 0.00  |
|                                              | Nonavoidable deaths                          | 0.00                | 0.01 | 0.01 | 0.01  | 0.01  | 0.02  | 0.02  | 0.02  | 0.04  | 0.05  | 0.04  | 0.05  | 0.05  | 0.02  | 0.01  | 0.00  |
|                                              | Pregnancy, childbirth and perinatal period   | 0.09                | 0.00 | 0.00 | 0.00  | 0.00  | 0.00  | 0.00  | 0.00  | 0.00  | 0.00  | 0.00  | 0.00  | 0.00  | 0.00  | 0.00  | 0.00  |
|                                              | Adverse effects of medical and surgical care | 0.00                | 0.00 | 0.00 | 0.00  | 0.00  | 0.00  | 0.00  | 0.00  | 0.00  | 0.00  | 0.00  | 0.00  | 0.00  | 0.00  | 0.00  | 0.00  |
|                                              | Alcohol- related and drug related deaths     | 0.00                | 0.00 | 0.00 | 0.00  | 0.00  | 0.00  | 0.00  | 0.00  | 0.00  | 0.00  | 0.01  | 0.01  | 0.01  | 0.01  | 0.01  | 0.00  |
|                                              | Cancer                                       | 0.00                | 0.00 | 0.00 | 0.00  | 0.00  | 0.00  | 0.00  | 0.00  | 0.00  | 0.00  | 0.01  | 0.02  | 0.04  | 0.07  | 0.08  | 0.07  |
|                                              | Cardiovascular diseases                      | 0.00                | 0.00 | 0.00 | 0.00  | 0.00  | 0.00  | 0.00  | 0.00  | 0.00  | 0.00  | 0.00  | 0.01  | 0.02  | 0.03  | 0.05  | 0.08  |
|                                              | Cerebrovascular diseases                     | 0.00                | 0.00 | 0.00 | 0.00  | 0.00  | 0.00  | 0.00  | 0.00  | 0.00  | 0.00  | 0.01  | 0.01  | 0.02  | 0.02  | 0.04  | 0.05  |
|                                              | Congenital malformations                     | 0.03                | 0.01 | 0.00 | 0.00  | 0.00  | 0.00  | 0.00  | 0.00  | 0.00  | 0.00  | 0.00  | 0.00  | 0.00  | 0.00  | 0.00  | 0.00  |
|                                              | Diseases of the digestive system             | 0.00                | 0.00 | 0.00 | 0.00  | 0.00  | 0.00  | 0.00  | 0.00  | 0.00  | 0.00  | 0.00  | 0.00  | 0.00  | 0.01  | 0.01  | 0.01  |
|                                              | Diseases of the genitourinary system         | 0.00                | 0.00 | 0.00 | 0.00  | 0.00  | 0.00  | 0.00  | 0.00  | 0.00  | 0.00  | 0.00  | 0.00  | 0.00  | 0.00  | 0.00  | 0.00  |
|                                              | Diseases of the nervous system               | 0.00                | 0.00 | 0.00 | 0.00  | 0.00  | 0.00  | 0.00  | 0.00  | 0.00  | 0.00  | 0.00  | 0.00  | 0.00  | 0.00  | 0.00  | 0.00  |
|                                              | Diseases of the respiratory system           | 0.01                | 0.00 | 0.00 | 0.00  | 0.00  | 0.00  | 0.00  | 0.00  | 0.00  | 0.00  | 0.00  | 0.00  | 0.00  | 0.00  | 0.00  | 0.00  |
|                                              | Endocrine and metabolic diseases             | 0.00                | 0.00 | 0.00 | 0.00  | 0.00  | 0.00  | 0.00  | 0.00  | 0.00  | 0.00  | 0.00  | 0.00  | 0.00  | 0.00  | 0.01  | 0.01  |
|                                              | Romania                                      | Infectious diseases | 0.00 | 0.00 | 0.00  | 0.00  | 0.00  | 0.00  | 0.00  | 0.00  | 0.00  | 0.00  | 0.00  | 0.00  | 0.00  | 0.00  | 0.00  |
| Injuries                                     |                                              | 0.00                | 0.00 | 0.00 | 0.01  | 0.02  | 0.01  | 0.00  | 0.01  | 0.01  | 0.01  | 0.01  | 0.01  | 0.01  | 0.01  | 0.00  | 0.00  |
| Nonavoidable deaths                          |                                              | 0.00                | 0.00 | 0.00 | 0.00  | 0.00  | 0.00  | 0.00  | 0.00  | 0.00  | 0.00  | 0.00  | 0.00  | 0.00  | 0.00  | 0.00  | 0.00  |
| Pregnancy, childbirth and perinatal period   |                                              | 0.05                | 0.00 | 0.00 | 0.00  | 0.00  | 0.00  | 0.00  | 0.00  | 0.00  | 0.00  | 0.00  | 0.00  | 0.00  | 0.00  | 0.00  | 0.00  |
| Adverse effects of medical and surgical care |                                              | 0.00                | 0.00 | 0.00 | 0.00  | 0.00  | 0.00  | 0.00  | 0.00  | 0.00  | 0.00  | 0.00  | 0.00  | 0.00  | 0.00  | 0.00  | 0.00  |
| Alcohol- related and drug related deaths     |                                              | 0.00                | 0.00 | 0.00 | 0.00  | 0.00  | 0.00  | 0.00  | 0.00  | 0.00  | 0.00  | 0.01  | 0.02  | 0.04  | 0.05  | 0.05  | 0.05  |
| Cancer                                       |                                              | 0.00                | 0.00 | 0.00 | 0.00  | 0.00  | 0.00  | 0.00  | 0.00  | 0.01  | 0.02  | 0.03  | 0.05  | 0.05  | 0.05  | 0.03  | 0.02  |



| Country                              | Cause Group                                  | 0-1  | 1-4  | 5-9  | 10-14 | 15-19 | 20-24 | 25-29 | 30-34 | 35-39 | 40-44 | 45-49 | 50-54 | 55-59 | 60-64 | 65-69 | 70-74 |      |
|--------------------------------------|----------------------------------------------|------|------|------|-------|-------|-------|-------|-------|-------|-------|-------|-------|-------|-------|-------|-------|------|
| Slovakia                             | Cardiovascular diseases                      | 0.00 | 0.00 | 0.00 | 0.00  | 0.00  | 0.00  | 0.00  | 0.01  | 0.01  | 0.02  | 0.04  | 0.07  | 0.11  | 0.17  | 0.24  | 0.35  |      |
|                                      | Cerebrovascular diseases                     | 0.00 | 0.00 | 0.00 | 0.00  | 0.00  | 0.00  | 0.00  | 0.00  | 0.01  | 0.01  | 0.02  | 0.04  | 0.07  | 0.11  | 0.16  | 0.24  |      |
|                                      | Congenital malformations                     | 0.06 | 0.01 | 0.00 | 0.00  | 0.00  | 0.00  | 0.00  | 0.00  | 0.00  | 0.00  | 0.00  | 0.00  | 0.00  | 0.00  | 0.00  | 0.00  | 0.00 |
|                                      | Diseases of the digestive system             | 0.00 | 0.00 | 0.00 | 0.00  | 0.00  | 0.00  | 0.00  | 0.00  | 0.00  | 0.00  | 0.00  | 0.00  | 0.00  | 0.00  | 0.00  | 0.00  | 0.00 |
|                                      | Diseases of the genitourinary system         | 0.00 | 0.00 | 0.00 | 0.00  | 0.00  | 0.00  | 0.00  | 0.00  | 0.00  | 0.00  | 0.00  | 0.01  | 0.01  | 0.01  | 0.01  | 0.01  |      |
|                                      | Diseases of the nervous system               | 0.00 | 0.00 | 0.00 | 0.00  | 0.00  | 0.00  | 0.00  | 0.00  | 0.00  | 0.00  | 0.00  | 0.00  | 0.00  | 0.00  | 0.00  | 0.00  | 0.00 |
|                                      | Diseases of the respiratory system           | 0.18 | 0.03 | 0.01 | 0.01  | 0.01  | 0.01  | 0.01  | 0.01  | 0.01  | 0.01  | 0.01  | 0.01  | 0.01  | 0.01  | 0.01  | 0.01  | 0.00 |
|                                      | Endocrine and metabolic diseases             | 0.00 | 0.00 | 0.00 | 0.00  | 0.00  | 0.00  | 0.00  | 0.00  | 0.00  | 0.00  | 0.00  | 0.00  | 0.00  | 0.00  | 0.01  | 0.01  | 0.00 |
|                                      | Infectious diseases                          | 0.01 | 0.00 | 0.00 | 0.00  | 0.01  | 0.01  | 0.01  | 0.01  | 0.00  | 0.00  | 0.00  | 0.00  | 0.00  | 0.00  | 0.00  | 0.00  | 0.00 |
|                                      | Injuries                                     | 0.02 | 0.03 | 0.02 | 0.02  | 0.02  | 0.01  | 0.01  | 0.01  | 0.01  | 0.01  | 0.01  | 0.02  | 0.02  | 0.01  | 0.01  | 0.01  | 0.01 |
|                                      | Nonavoidable deaths                          | 0.00 | 0.00 | 0.00 | 0.00  | 0.00  | 0.00  | 0.00  | 0.00  | 0.00  | 0.00  | 0.00  | 0.00  | 0.00  | 0.00  | 0.00  | 0.00  | 0.00 |
|                                      | Pregnancy, childbirth and perinatal period   | 0.10 | 0.00 | 0.00 | 0.00  | 0.00  | 0.00  | 0.00  | 0.00  | 0.00  | 0.00  | 0.00  | 0.00  | 0.00  | 0.00  | 0.00  | 0.00  | 0.00 |
|                                      | Adverse effects of medical and surgical care | 0.00 | 0.00 | 0.00 | 0.00  | 0.00  | 0.00  | 0.00  | 0.00  | 0.00  | 0.00  | 0.00  | 0.00  | 0.00  | 0.00  | 0.00  | 0.00  | 0.00 |
|                                      | Alcohol- related and drug related deaths     | 0.00 | 0.00 | 0.00 | 0.00  | 0.00  | 0.00  | 0.00  | 0.00  | 0.00  | 0.01  | 0.02  | 0.03  | 0.03  | 0.03  | 0.01  | 0.01  |      |
|                                      | Cancer                                       | 0.00 | 0.00 | 0.00 | 0.00  | 0.00  | 0.00  | 0.00  | 0.00  | 0.01  | 0.01  | 0.01  | 0.02  | 0.02  | 0.03  | 0.04  | 0.03  |      |
|                                      | Cardiovascular diseases                      | 0.00 | 0.00 | 0.00 | 0.00  | 0.00  | 0.00  | 0.00  | 0.00  | 0.00  | 0.01  | 0.02  | 0.04  | 0.07  | 0.13  | 0.20  | 0.32  |      |
|                                      | Cerebrovascular diseases                     | 0.00 | 0.00 | 0.00 | 0.00  | 0.00  | 0.00  | 0.00  | 0.00  | 0.00  | 0.00  | 0.01  | 0.01  | 0.02  | 0.04  | 0.06  | 0.09  |      |
|                                      | Congenital malformations                     | 0.02 | 0.00 | 0.00 | 0.00  | 0.00  | 0.00  | 0.00  | 0.00  | 0.00  | 0.00  | 0.00  | 0.00  | 0.00  | 0.00  | 0.00  | 0.00  |      |
|                                      | Diseases of the digestive system             | 0.00 | 0.00 | 0.00 | 0.00  | 0.00  | 0.00  | 0.00  | 0.00  | 0.00  | 0.00  | 0.00  | 0.00  | 0.01  | 0.01  | 0.01  | 0.01  |      |
| Diseases of the genitourinary system | 0.00                                         | 0.00 | 0.00 | 0.00 | 0.00  | 0.00  | 0.00  | 0.00  | 0.00  | 0.00  | 0.00  | 0.00  | 0.00  | 0.01  | 0.01  | 0.01  |       |      |
| Diseases of the nervous system       | 0.00                                         | 0.00 | 0.00 | 0.00 | 0.00  | 0.00  | 0.00  | 0.00  | 0.00  | 0.00  | 0.00  | 0.00  | 0.00  | 0.00  | 0.00  | 0.00  |       |      |
| Diseases of the respiratory system   | 0.03                                         | 0.01 | 0.00 | 0.00 | 0.00  | 0.00  | 0.00  | 0.00  | 0.00  | 0.01  | 0.01  | 0.01  | 0.01  | 0.00  | 0.00  | 0.00  |       |      |

| Country                                    | Cause Group                                  | 0-1   | 1-4  | 5-9  | 10-14 | 15-19 | 20-24 | 25-29 | 30-34 | 35-39 | 40-44 | 45-49 | 50-54 | 55-59 | 60-64 | 65-69 | 70-74 |       |
|--------------------------------------------|----------------------------------------------|-------|------|------|-------|-------|-------|-------|-------|-------|-------|-------|-------|-------|-------|-------|-------|-------|
| Slovenia                                   | Endocrine and metabolic diseases             | 0-00  | 0-00 | 0-00 | 0-00  | 0-00  | 0-00  | 0-00  | 0-00  | 0-00  | 0-00  | 0-00  | 0-00  | 0-00  | 0-01  | 0-01  | 0-01  |       |
|                                            | Infectious diseases                          | 0-00  | 0-00 | 0-00 | 0-00  | 0-00  | 0-00  | 0-00  | 0-00  | 0-00  | 0-00  | 0-00  | 0-00  | 0-00  | 0-00  | 0-00  | 0-00  | 0-00  |
|                                            | Injuries                                     | 0-01  | 0-00 | 0-01 | 0-01  | 0-01  | 0-00  | 0-00  | 0-00  | 0-01  | 0-01  | 0-01  | 0-01  | 0-01  | 0-01  | 0-01  | 0-01  | 0-01  |
|                                            | Nonavoidable deaths                          | 0-00  | 0-00 | 0-00 | 0-00  | 0-00  | 0-00  | 0-00  | 0-00  | 0-00  | 0-00  | 0-00  | 0-00  | 0-00  | 0-00  | 0-00  | 0-00  | 0-00  |
|                                            | Pregnancy, childbirth and perinatal period   | 0-03  | 0-00 | 0-00 | 0-00  | 0-00  | 0-00  | 0-00  | 0-00  | 0-00  | 0-00  | 0-00  | 0-00  | 0-00  | 0-00  | 0-00  | 0-00  | 0-00  |
|                                            | Adverse effects of medical and surgical care | 0-00  | 0-00 | 0-00 | 0-00  | 0-00  | 0-00  | 0-00  | 0-00  | 0-00  | 0-00  | 0-00  | 0-00  | 0-00  | 0-00  | 0-00  | 0-01  | 0-01  |
|                                            | Alcohol- related and drug related deaths     | 0-00  | 0-00 | 0-00 | 0-00  | 0-00  | 0-00  | 0-00  | 0-00  | 0-00  | 0-00  | 0-00  | 0-00  | 0-01  | 0-02  | 0-03  | 0-03  | 0-04  |
|                                            | Cancer                                       | 0-00  | 0-00 | 0-00 | 0-00  | 0-00  | 0-00  | 0-00  | 0-00  | 0-00  | 0-00  | 0-00  | 0-00  | 0-02  | 0-03  | 0-03  | 0-03  | 0-03  |
|                                            | Cardiovascular diseases                      | 0-00  | 0-00 | 0-00 | 0-00  | 0-00  | 0-00  | 0-00  | 0-00  | 0-00  | 0-00  | 0-00  | 0-00  | 0-00  | 0-00  | 0-00  | 0-00  | 0-02  |
|                                            | Cerebrovascular diseases                     | 0-00  | 0-00 | 0-00 | 0-00  | 0-00  | 0-00  | 0-00  | 0-00  | 0-00  | 0-00  | 0-00  | 0-00  | 0-00  | 0-00  | 0-01  | 0-02  | 0-03  |
|                                            | Congenital malformations                     | -0-01 | 0-00 | 0-00 | 0-00  | 0-00  | 0-00  | 0-00  | 0-00  | 0-00  | 0-00  | 0-00  | 0-00  | 0-00  | 0-00  | 0-00  | 0-00  | 0-00  |
|                                            | Diseases of the digestive system             | 0-00  | 0-00 | 0-00 | 0-00  | 0-00  | 0-00  | 0-00  | 0-00  | 0-00  | 0-00  | 0-00  | 0-00  | 0-00  | 0-00  | 0-00  | 0-00  | 0-00  |
|                                            | Diseases of the genitourinary system         | 0-00  | 0-00 | 0-00 | 0-00  | 0-00  | 0-00  | 0-00  | 0-00  | 0-00  | 0-00  | 0-00  | 0-00  | 0-00  | 0-00  | 0-00  | 0-00  | 0-00  |
|                                            | Diseases of the nervous system               | 0-00  | 0-00 | 0-00 | 0-00  | 0-00  | 0-00  | 0-00  | 0-00  | 0-00  | 0-00  | 0-00  | 0-00  | 0-00  | 0-00  | 0-00  | 0-00  | 0-00  |
|                                            | Diseases of the respiratory system           | 0-00  | 0-00 | 0-00 | 0-00  | 0-00  | 0-00  | 0-00  | 0-00  | 0-00  | 0-00  | 0-00  | 0-00  | -0-01 | -0-01 | -0-02 | -0-03 | -0-03 |
|                                            | Endocrine and metabolic diseases             | 0-00  | 0-00 | 0-00 | 0-00  | 0-00  | 0-00  | 0-00  | 0-00  | 0-00  | 0-00  | 0-00  | 0-00  | 0-00  | 0-00  | 0-00  | 0-00  | 0-00  |
|                                            | Infectious diseases                          | 0-00  | 0-00 | 0-00 | 0-00  | 0-00  | 0-00  | 0-00  | 0-00  | 0-00  | 0-00  | 0-00  | 0-00  | 0-00  | 0-00  | -0-01 | -0-01 | -0-01 |
|                                            | Injuries                                     | 0-00  | 0-01 | 0-00 | 0-00  | 0-01  | 0-01  | 0-00  | 0-00  | 0-00  | 0-00  | 0-01  | 0-01  | 0-01  | 0-01  | 0-01  | 0-01  | 0-02  |
|                                            | Nonavoidable deaths                          | 0-05  | 0-00 | 0-00 | 0-00  | 0-00  | 0-01  | 0-01  | 0-01  | 0-01  | 0-01  | 0-01  | 0-01  | 0-00  | 0-00  | 0-00  | 0-00  | 0-00  |
| Pregnancy, childbirth and perinatal period | -0-03                                        | 0-00  | 0-00 | 0-00 | 0-00  | 0-00  | 0-00  | 0-00  | 0-00  | 0-00  | 0-00  | 0-00  | 0-00  | 0-00  | 0-00  | 0-00  | 0-00  |       |
| New member states                          | Adverse effects of medical and surgical care | 0-00  | 0-00 | 0-00 | 0-00  | 0-00  | 0-00  | 0-00  | 0-00  | 0-00  | 0-00  | 0-00  | 0-00  | 0-00  | 0-00  | 0-00  | 0-00  |       |
|                                            | Alcohol- related and drug related deaths     | 0-00  | 0-00 | 0-00 | 0-00  | 0-00  | 0-00  | 0-00  | 0-00  | 0-01  | 0-01  | 0-02  | 0-02  | 0-02  | 0-02  | 0-01  | 0-01  |       |

| Country | Cause Group                                | 0-1  | 1-4  | 5-9  | 10-14 | 15-19 | 20-24 | 25-29 | 30-34 | 35-39 | 40-44 | 45-49 | 50-54 | 55-59 | 60-64 | 65-69 | 70-74 |
|---------|--------------------------------------------|------|------|------|-------|-------|-------|-------|-------|-------|-------|-------|-------|-------|-------|-------|-------|
|         | Cancer                                     | 0.00 | 0.00 | 0.00 | 0.00  | 0.00  | 0.00  | 0.00  | 0.00  | 0.01  | 0.01  | 0.02  | 0.02  | 0.03  | 0.03  | 0.02  | 0.02  |
|         | Cardiovascular diseases                    | 0.00 | 0.00 | 0.00 | 0.00  | 0.00  | 0.00  | 0.00  | 0.00  | 0.00  | 0.01  | 0.02  | 0.04  | 0.06  | 0.10  | 0.14  | 0.21  |
|         | Cerebrovascular diseases                   | 0.00 | 0.00 | 0.00 | 0.00  | 0.00  | 0.00  | 0.00  | 0.00  | 0.00  | 0.01  | 0.01  | 0.02  | 0.03  | 0.05  | 0.07  | 0.11  |
|         | Congenital malformations                   | 0.02 | 0.00 | 0.00 | 0.00  | 0.00  | 0.00  | 0.00  | 0.00  | 0.00  | 0.00  | 0.00  | 0.00  | 0.00  | 0.00  | 0.00  | 0.00  |
|         | Diseases of the digestive system           | 0.00 | 0.00 | 0.00 | 0.00  | 0.00  | 0.00  | 0.00  | 0.00  | 0.00  | 0.00  | 0.00  | 0.00  | 0.00  | 0.00  | 0.00  | 0.00  |
|         | Diseases of the genitourinary system       | 0.00 | 0.00 | 0.00 | 0.00  | 0.00  | 0.00  | 0.00  | 0.00  | 0.00  | 0.00  | 0.00  | 0.00  | 0.00  | 0.00  | 0.00  | 0.00  |
|         | Diseases of the nervous system             | 0.00 | 0.00 | 0.00 | 0.00  | 0.00  | 0.00  | 0.00  | 0.00  | 0.00  | 0.00  | 0.00  | 0.00  | 0.00  | 0.00  | 0.00  | 0.00  |
|         | Diseases of the respiratory system         | 0.03 | 0.00 | 0.00 | 0.00  | 0.00  | 0.00  | 0.00  | 0.00  | 0.00  | 0.00  | 0.00  | 0.00  | 0.00  | 0.00  | -0.01 | -0.01 |
|         | Endocrine and metabolic diseases           | 0.00 | 0.00 | 0.00 | 0.00  | 0.00  | 0.00  | 0.00  | 0.00  | 0.00  | 0.00  | 0.00  | 0.00  | 0.00  | 0.01  | 0.01  | 0.02  |
|         | Infectious diseases                        | 0.00 | 0.00 | 0.00 | 0.00  | 0.00  | 0.00  | 0.00  | 0.00  | 0.00  | 0.00  | 0.00  | 0.00  | 0.00  | 0.00  | 0.00  | 0.00  |
|         | Injuries                                   | 0.01 | 0.01 | 0.01 | 0.01  | 0.01  | 0.01  | 0.01  | 0.01  | 0.01  | 0.02  | 0.02  | 0.02  | 0.02  | 0.01  | 0.01  | 0.01  |
|         | Nonavoidable deaths                        | 0.01 | 0.00 | 0.00 | 0.00  | 0.00  | 0.00  | 0.00  | 0.00  | 0.01  | 0.01  | 0.01  | 0.01  | 0.01  | 0.01  | 0.01  | 0.01  |
|         | Pregnancy, childbirth and perinatal period | 0.03 | 0.00 | 0.00 | 0.00  | 0.00  | 0.00  | 0.00  | 0.00  | 0.00  | 0.00  | 0.00  | 0.00  | 0.00  | 0.00  | 0.00  | 0.00  |
